# Supplementary material for: Metal-free regioselective nitration of quinoxalin-2(1H)-ones with tert-butyl nitrite
Source: Royal Society of Chemistry journal article supplement (doi:10.1039/d1ob02015c), 2021-01-01

## Supplementary Information

### Metal-free regioselective nitration of quinoxalin-2(1H)-ones with *tert*-butyl nitrite

Yi-Na Li,<sup>†a</sup> Xue-Lin Li,<sup>†b</sup> Jin-Bo Wu,<sup>a</sup> Hong Jiang,<sup>a</sup> Yunmei Liu,<sup>a</sup> Yu Guo,<sup>\*a</sup> Yao-Fu Zeng<sup>\*a</sup> and Zhen Wang<sup>\*a</sup>

<sup>a</sup> School of Pharmaceutical Science, Hunan Provincial Key Laboratory of Tumor Microenvironment Responsive Drug Research, Hengyang Medical School, University of South China, Hengyang, Hunan, 421001, China. E-mail: zengyf@usc.edu.cn

<sup>b</sup> The First Affiliated Hospital, Hengyang Medical School, University of South China, Hengyang, Hunan, 421001, China.

<sup>†</sup> These authors contributed equally to this work.

### Table of Contents

|                                                                                          |    |
|------------------------------------------------------------------------------------------|----|
| 1. General information .....                                                             | 2  |
| 2. General procedure for the coupling of quinoxalin-2(1H)-ones with <i>t</i> -BuONO..... | 2  |
| 3. Synthesis of 7-amino-1-methylquinoxalin-2(1H)-one.....                                | 2  |
| 4. Control experiments.....                                                              | 3  |
| 5. Validation of the structures of compounds <b>2u</b> and <b>2v</b> .....               | 3  |
| 6. Single crystal X-ray structure of compound <b>2aa</b> .....                           | 5  |
| 7. Characterization data of products.....                                                | 14 |
| 8. NMR spectra of products.....                                                          | 22 |

## 1. General information

All reagents were obtained commercially and used without further purification. Column chromatography was performed on silica gel (200-300 mesh). The reported yields are the actual isolated yields of pure products.  $^1\text{H}$  NMR spectra were obtained in  $\text{CDCl}_3$  or  $\text{DMSO}-d_6$  at 400 MHz (Bruker AVANCE III 400) or 500 MHz (Bruker Ascend 500).  $^{13}\text{C}$  NMR spectra were obtained at 101 MHz or 126 MHz. The chemical shifts ( $\delta$ ) were expressed in ppm and coupling constants (J) were in Hz. High-resolution mass spectra (HRMS) were obtained on a mass spectrometer by the ESI method.

## 2. General procedure for the coupling of quinoxalin-2(1H)-ones with *t*-BuONO

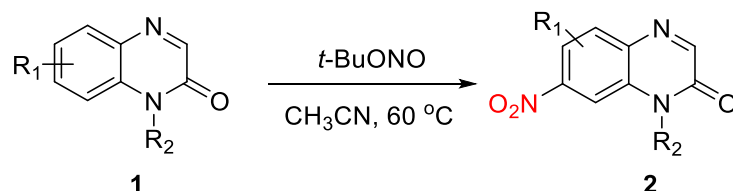

In a 10 mL reaction tube with magnetic stir bar, *t*-BuONO (1.2 mmol) was added to the solution of quinoxalin-2(1H)-ones **1** (0.4 mmol) in MeCN (4.0 mL). The mixture was stirred at 60 °C for 6-24 h. Upon completion as indicated by TLC, the solution was concentrated under reduced pressure. The residue was purified by flash column chromatography over silica gel using a mixture of petroleum ether and ethyl acetate as eluent to give the desired product **2**.

## 3. Synthesis of 7-amino-1-methylquinoxalin-2(1H)-one

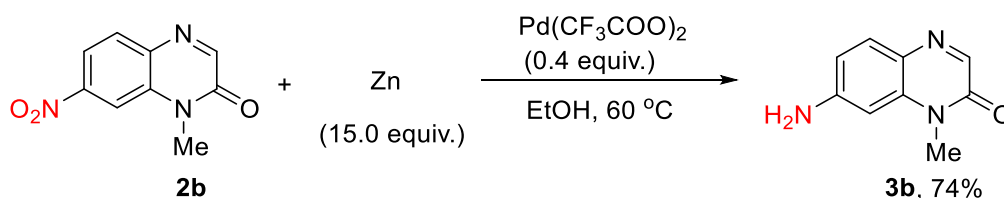

To a stirred mixture of the 1-methyl-7-nitroquinoxalin-2(1H)-one **2b** (0.1 mmol) in EtOH (2.0 mL) was added Zn (1.5 mmol, 15.0 equiv) and  $\text{Pd}(\text{CF}_3\text{COO})_2$  (0.04 mmol, 0.4 equiv). The mixture was stirred at 60 °C. Upon completion as monitored by TLC, the mixture was filtered and evaporated under reduced pressure. The residue was

purified by flash column chromatography over silica gel using petroleum ether/ethyl acetate as eluent to afford the desired product **3b**.

#### 4. Control experiments

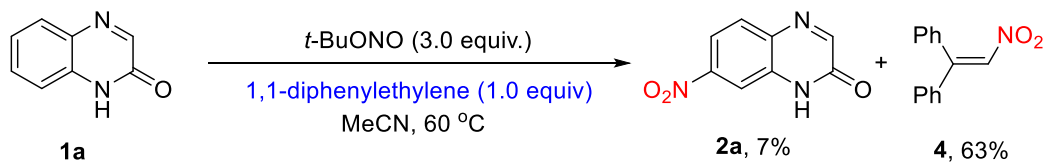

In a 10 mL reaction tube with magnetic stir bar, *t*-BuONO (1.2 mmol) was added to the solution of quinoxalin-2(1H)-ones **1a** (0.4 mmol) and 1,1-diphenylethylene (0.4 mmol) in MeCN (4.0 mL). The mixture was stirred at 60 °C for 6 h. Then the reaction mixture was concentrated under reduced pressure and purified by flash column chromatography over silica gel using a mixture of petroleum ether and ethyl acetate as eluent.

#### 5. Validation of the structures of compounds **2u** and **2v**

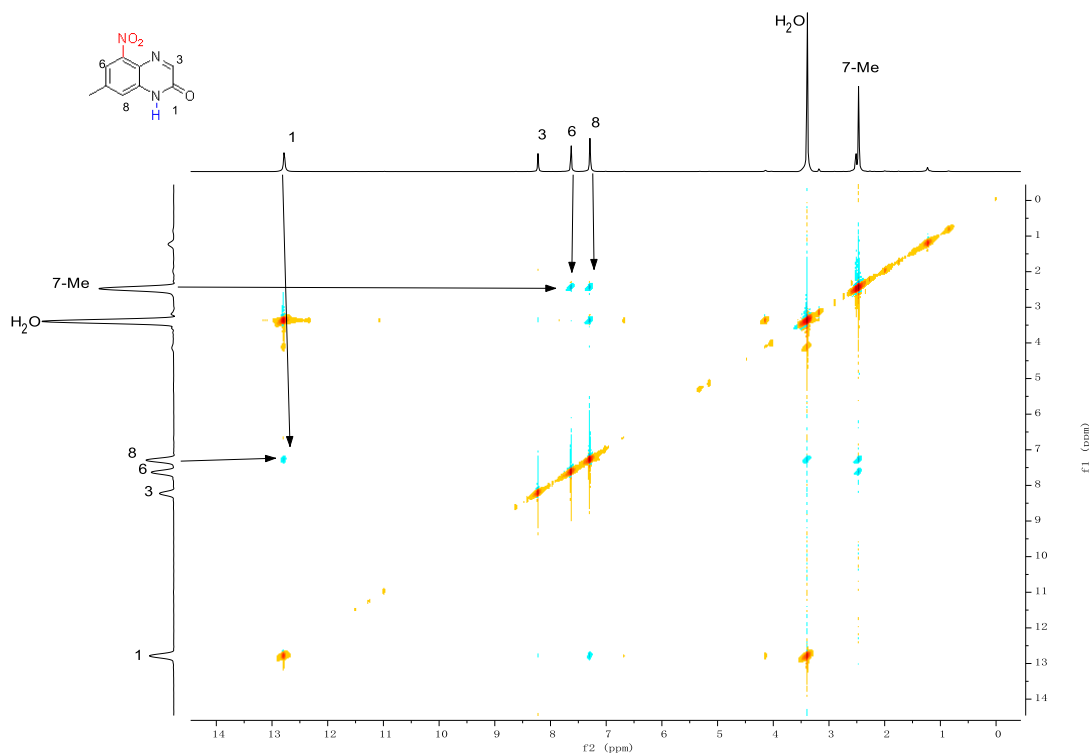

NOESY NMR spectrum of **2u** in DMSO-*d*<sub>6</sub>.

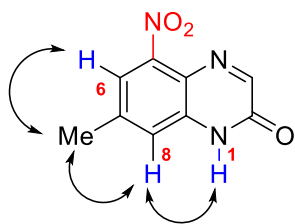

From the NOESY NMR spectrum of **2u**, correlation peaks between 7-Me ( $\delta_{\text{H}}$  2.45, s) and 6-H ( $\delta_{\text{H}}$  7.61, s), 7-Me ( $\delta_{\text{H}}$  2.45, s) and 8-H ( $\delta_{\text{H}}$  7.28, s), 8-H ( $\delta_{\text{H}}$  7.28, s) and N-H ( $\delta_{\text{H}}$  12.67, s) were observed, which gave evidence

that the nitro group was located at C5 position of phenyl ring.

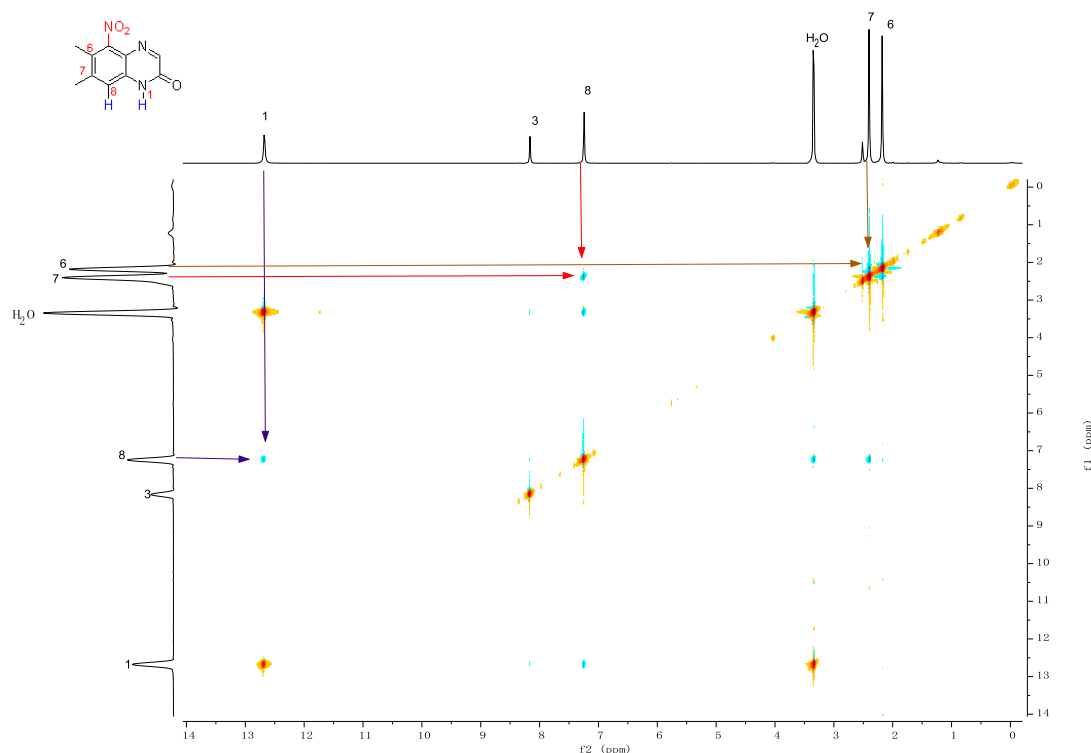

NOESY NMR spectrum of **2v** in DMSO-*d*<sub>6</sub>.

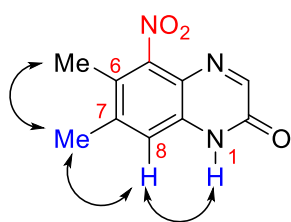

From the NOESY NMR spectrum of **2v**, correlation peaks between 7-Me ( $\delta_{\text{H}}$  2.39, s) and 6-Me ( $\delta_{\text{H}}$  2.17, s), 7-Me ( $\delta_{\text{H}}$  2.39, s) and 8-H ( $\delta_{\text{H}}$  7.24, s), 8-H ( $\delta_{\text{H}}$  7.24, s) and N-H ( $\delta_{\text{H}}$  12.69, s) were observed, which gave evidence that the

nitro group was located at C5 position of phenyl ring.

## 6. Single crystal X-ray structure of compound **2aa**

X-ray crystallographic data for compound **2aa** (CCDC: 2120757)

**Crystal Data** for  $C_{17}H_{14}BrN_3O_3$  ( $M = 388.22$  g/mol): monoclinic, space group  $P2_1/c$  (no. 14),  $a = 21.4559(18)$  Å,  $b = 8.8913(8)$  Å,  $c = 17.8312(16)$  Å,  $\beta = 102.210(9)^\circ$ ,  $V = 3324.7(5)$  Å<sup>3</sup>,  $Z = 8$ ,  $T = 292.99(10)$  K,  $\mu(\text{Mo K}\alpha) = 2.493$  mm<sup>-1</sup>,  $D_{\text{calc}} = 1.551$  g/cm<sup>3</sup>, 17453 reflections measured ( $4.668^\circ \leq 2\Theta \leq 50^\circ$ ), 5861 unique ( $R_{\text{int}} = 0.0614$ ,  $R_{\text{sigma}} = 0.0952$ ) which were used in all calculations. The final  $R_1$  was 0.0554 ( $I > 2\sigma(I)$ ) and  $wR_2$  was 0.1249 (all data).

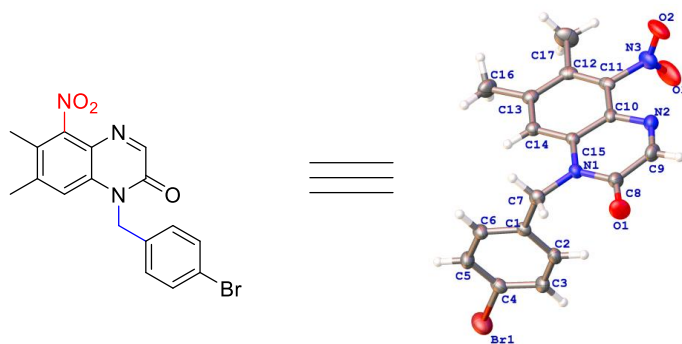

**Table 1 Crystal data and structure refinement for 2aa.**

|                                               |                                                               |
|-----------------------------------------------|---------------------------------------------------------------|
| Identification code                           | <b>2aa</b>                                                    |
| Empirical formula                             | $C_{17}H_{14}BrN_3O_3$                                        |
| Formula weight                                | 388.22                                                        |
| Temperature/K                                 | 292.99(10)                                                    |
| Crystal system                                | monoclinic                                                    |
| Space group                                   | $P2_1/c$                                                      |
| $a/\text{\AA}$                                | 21.4559(18)                                                   |
| $b/\text{\AA}$                                | 8.8913(8)                                                     |
| $c/\text{\AA}$                                | 17.8312(16)                                                   |
| $\alpha/^\circ$                               | 90                                                            |
| $\beta/^\circ$                                | 102.210(9)                                                    |
| $\gamma/^\circ$                               | 90                                                            |
| Volume/ $\text{\AA}^3$                        | 3324.7(5)                                                     |
| Z                                             | 8                                                             |
| $\rho_{\text{calc}}/\text{g/cm}^3$            | 1.551                                                         |
| $\mu/\text{mm}^{-1}$                          | 2.493                                                         |
| F(000)                                        | 1568.0                                                        |
| Crystal size/ $\text{mm}^3$                   | $0.14 \times 0.12 \times 0.11$                                |
| Radiation                                     | Mo $K\alpha$ ( $\lambda = 0.71073$ )                          |
| $2\theta$ range for data collection/ $^\circ$ | 4.668 to 50                                                   |
| Index ranges                                  | $-25 \leq h \leq 23, -9 \leq k \leq 10, -19 \leq l \leq 21$   |
| Reflections collected                         | 17453                                                         |
| Independent reflections                       | 5861 [ $R_{\text{int}} = 0.0614, R_{\text{sigma}} = 0.0952$ ] |
| Data/restraints/parameters                    | 5861/0/438                                                    |
| Goodness-of-fit on $F^2$                      | 1.018                                                         |
| Final R indexes [ $I \geq 2\sigma(I)$ ]       | $R_1 = 0.0554, wR_2 = 0.0981$                                 |
| Final R indexes [all data]                    | $R_1 = 0.1298, wR_2 = 0.1249$                                 |
| Largest diff. peak/hole / $e \text{\AA}^{-3}$ | 0.49/-0.42                                                    |

**Table 2 Fractional Atomic Coordinates ( $\times 10^4$ ) and Equivalent Isotropic Displacement Parameters ( $\text{\AA}^2 \times 10^3$ ) for 2aa.  $U_{\text{eq}}$  is defined as 1/3 of the trace of the orthogonalised  $U_{\text{H}}$  tensor.**

| Atom | x          | y         | z          | U(eq)     |
|------|------------|-----------|------------|-----------|
| Br1  | 3057.4(3)  | 9425.5(7) | 3821.4(4)  | 78.2(2)   |
| O1   | 140.3(18)  | 4039(4)   | 2690.0(17) | 71.9(11)  |
| O2   | 611(2)     | 533(4)    | 5998(2)    | 84.2(12)  |
| O3   | 1597(2)    | 616(4)    | 5942(3)    | 106.2(16) |
| N1   | 489.4(15)  | 4925(4)   | 3911.4(17) | 34.8(8)   |
| N2   | 616.4(17)  | 1921(4)   | 4400(2)    | 45.8(10)  |
| N3   | 1079(2)    | 1184(5)   | 5892(2)    | 58.6(12)  |
| C1   | 1072(2)    | 7218(5)   | 3667(2)    | 33.7(10)  |
| C2   | 1538(2)    | 6492(5)   | 3368(2)    | 46.5(12)  |
| C3   | 2127(2)    | 7149(5)   | 3405(2)    | 49.3(12)  |
| C4   | 2238(2)    | 8534(5)   | 3740(2)    | 46.2(12)  |
| C5   | 1779(2)    | 9296(5)   | 4026(2)    | 49.7(12)  |
| C6   | 1195(2)    | 8615(5)   | 3985(2)    | 45.6(12)  |
| C7   | 436(2)     | 6494(5)   | 3641(2)    | 41.5(11)  |
| C8   | 331(2)     | 3785(5)   | 3380(3)    | 45.8(12)  |
| C9   | 403(2)     | 2271(5)   | 3696(3)    | 51.0(13)  |
| C10  | 782.5(19)  | 3101(5)   | 4909(2)    | 33.3(10)  |
| C11  | 1019.2(19) | 2798(5)   | 5683(2)    | 36.2(11)  |
| C12  | 1192.3(19) | 3874(5)   | 6245(2)    | 40.7(11)  |
| C13  | 1121(2)    | 5385(5)   | 6003(2)    | 40.2(11)  |
| C14  | 891.0(19)  | 5723(5)   | 5239(2)    | 37.1(11)  |
| C15  | 725.9(18)  | 4602(4)   | 4688(2)    | 30.1(10)  |
| C16  | 1312(2)    | 6638(5)   | 6575(2)    | 61.6(15)  |
| C17  | 1438(3)    | 3471(6)   | 7078(2)    | 72.5(17)  |
| Br2  | 3377.0(4)  | 9211.5(8) | 7024.1(4)  | 100.4(3)  |
| O4   | 1974.1(17) | 3236(4)   | 4024(2)    | 68.4(10)  |
| O5   | 4569(2)    | 1796(6)   | 2875(2)    | 116.4(18) |
| O6   | 4850(2)    | 4100(7)   | 3086(3)    | 120.1(19) |
| N4   | 2993.3(19) | 3035(4)   | 4725(2)    | 50.1(10)  |
| N5   | 3409(2)    | 3261(4)   | 3335(2)    | 53.6(11)  |
| N6   | 4655(2)    | 2916(8)   | 3265(3)    | 77.4(15)  |
| C18  | 2899(2)    | 4545(6)   | 5854(3)    | 52.7(13)  |
| C19  | 3297(3)    | 4676(7)   | 6575(3)    | 70.7(16)  |
| C20  | 3432(3)    | 6025(8)   | 6926(3)    | 71.9(17)  |
| C21  | 3174(3)    | 7323(7)   | 6550(3)    | 65.5(16)  |

|     |         |         |         |          |
|-----|---------|---------|---------|----------|
| C22 | 2771(2) | 7240(6) | 5840(3) | 64.1(15) |
| C23 | 2647(2) | 5855(6) | 5501(3) | 54.4(13) |
| C24 | 2771(2) | 3053(6) | 5452(3) | 60.1(14) |
| C25 | 2547(3) | 3197(5) | 4048(3) | 53.9(13) |
| C26 | 2818(3) | 3356(5) | 3370(3) | 58.3(14) |
| C27 | 3832(2) | 2996(5) | 4029(2) | 46.3(12) |
| C28 | 3646(2) | 2901(5) | 4732(2) | 47.6(12) |
| C29 | 4110(2) | 2649(6) | 5393(2) | 58.2(14) |
| C30 | 4742(3) | 2488(7) | 5370(3) | 68.6(16) |
| C31 | 4941(2) | 2602(6) | 4664(3) | 68.0(16) |
| C32 | 4476(2) | 2838(6) | 4024(2) | 54.2(13) |
| C33 | 5631(3) | 2448(9) | 4629(3) | 113(3)   |
| C34 | 5220(3) | 2202(8) | 6106(3) | 108(3)   |

**Table 3 Anisotropic Displacement Parameters ( $\text{\AA}^2 \times 10^3$ ) for 2aa. The Anisotropic displacement factor exponent takes the form:  $-2\pi^2[h^2a^*U_{11}+2hka^*b^*U_{12}+\dots]$ .**

| Atom | $U_{11}$ | $U_{22}$ | $U_{33}$ | $U_{23}$ | $U_{13}$ | $U_{12}$ |
|------|----------|----------|----------|----------|----------|----------|
| Br1  | 52.5(4)  | 66.6(5)  | 118.3(5) | 1.4(3)   | 24.6(3)  | -10.2(3) |
| O1   | 95(3)    | 74(3)    | 40.0(19) | -2.3(17) | -2.5(19) | -15(2)   |
| O2   | 79(3)    | 56(3)    | 128(3)   | 30(2)    | 45(3)    | -7(2)    |
| O3   | 73(3)    | 67(3)    | 185(4)   | 54(3)    | 42(3)    | 31(2)    |
| N1   | 32(2)    | 32(2)    | 40(2)    | 1.8(17)  | 7.7(16)  | -2.2(17) |
| N2   | 49(3)    | 38(2)    | 53(2)    | -3.7(19) | 18(2)    | -1.2(19) |
| N3   | 55(3)    | 48(3)    | 74(3)    | 20(2)    | 16(2)    | 11(3)    |
| C1   | 29(3)    | 34(3)    | 37(2)    | 6(2)     | 4(2)     | 2(2)     |
| C2   | 60(4)    | 33(3)    | 48(3)    | 0(2)     | 14(2)    | -2(3)    |
| C3   | 58(4)    | 36(3)    | 58(3)    | 2(2)     | 22(3)    | 9(3)     |
| C4   | 44(3)    | 41(3)    | 55(3)    | 11(2)    | 13(2)    | -1(2)    |
| C5   | 55(3)    | 36(3)    | 61(3)    | -10(2)   | 19(3)    | -4(3)    |
| C6   | 43(3)    | 39(3)    | 60(3)    | 2(2)     | 22(2)    | 1(2)     |
| C7   | 42(3)    | 42(3)    | 40(2)    | 5(2)     | 6(2)     | 4(2)     |
| C8   | 53(3)    | 40(3)    | 46(3)    | -5(2)    | 14(2)    | -9(2)    |
| C9   | 54(3)    | 48(3)    | 52(3)    | -19(2)   | 14(3)    | -9(3)    |
| C10  | 28(2)    | 31(3)    | 44(2)    | -3(2)    | 14(2)    | -2(2)    |
| C11  | 24(2)    | 41(3)    | 46(3)    | 14(2)    | 12(2)    | 8(2)     |
| C12  | 25(3)    | 58(3)    | 41(2)    | 7(2)     | 11(2)    | 0(2)     |
| C13  | 31(3)    | 49(3)    | 42(3)    | -2(2)    | 13(2)    | -1(2)    |
| C14  | 36(3)    | 39(3)    | 38(2)    | 1(2)     | 10(2)    | -1(2)    |



|     |          |          |         |          |         |              |
|-----|----------|----------|---------|----------|---------|--------------|
| C15 | 25(2)    | 32(3)    | 33(2)   | 2.8(19)  | 6.5(19) | -<br>2.4(19) |
| C16 | 71(4)    | 70(4)    | 43(3)   | -17(2)   | 12(3)   | -13(3)       |
| C17 | 73(4)    | 88(4)    | 46(3)   | 17(3)    | -10(3)  | -4(3)        |
| Br2 | 104.2(6) | 112.0(6) | 87.3(5) | -39.8(4) | 25.2(4) | -<br>18.7(4) |
| O4  | 43(2)    | 62(3)    | 100(3)  | 3.2(19)  | 14(2)   | 0.9(19)      |
| O5  | 138(5)   | 147(5)   | 74(3)   | -25(3)   | 46(3)   | 8(4)         |
| O6  | 122(4)   | 149(5)   | 106(3)  | 35(3)    | 61(3)   | -11(4)       |
| N4  | 45(3)    | 54(3)    | 54(2)   | 0.7(19)  | 17(2)   | -2(2)        |
| N5  | 53(3)    | 59(3)    | 51(2)   | 3.1(19)  | 15(2)   | -3(2)        |
| N6  | 67(4)    | 117(5)   | 56(3)   | 8(3)     | 29(3)   | 6(3)         |
| C18 | 37(3)    | 76(4)    | 51(3)   | 5(3)     | 21(2)   | 1(3)         |
| C19 | 65(4)    | 100(5)   | 49(3)   | 14(3)    | 16(3)   | 14(3)        |
| C20 | 66(4)    | 107(5)   | 40(3)   | -8(3)    | 7(3)    | 4(4)         |
| C21 | 51(4)    | 98(5)    | 53(3)   | -19(3)   | 24(3)   | -3(3)        |
| C22 | 61(4)    | 72(4)    | 59(3)   | -8(3)    | 13(3)   | 8(3)         |
| C23 | 37(3)    | 77(4)    | 49(3)   | -7(3)    | 9(2)    | 5(3)         |
| C24 | 45(3)    | 72(4)    | 69(3)   | 13(3)    | 26(3)   | 1(3)         |
| C25 | 49(4)    | 40(3)    | 72(4)   | -2(2)    | 13(3)   | -4(3)        |
| C26 | 66(4)    | 50(3)    | 54(3)   | -4(2)    | 3(3)    | -4(3)        |
| C27 | 39(3)    | 52(3)    | 45(3)   | -1(2)    | 2(2)    | -1(2)        |
| C28 | 41(3)    | 52(3)    | 50(3)   | -4(2)    | 12(3)   | 2(2)         |
| C29 | 53(4)    | 86(4)    | 38(3)   | 4(2)     | 15(3)   | 6(3)         |
| C30 | 42(4)    | 111(5)   | 51(3)   | 5(3)     | 6(3)    | 12(3)        |
| C31 | 42(3)    | 108(5)   | 56(3)   | 4(3)     | 14(3)   | 3(3)         |
| C32 | 41(3)    | 78(4)    | 46(3)   | 2(2)     | 15(3)   | 0(3)         |
| C33 | 44(4)    | 213(9)   | 87(4)   | 13(5)    | 25(3)   | 26(4)        |
| C34 | 66(5)    | 202(8)   | 56(3)   | 11(4)    | 10(3)   | 30(5)        |

**Table 4 Bond Lengths for 2aa.**

| Atom | Atom | Length/Å | Atom | Atom | Length/Å |
|------|------|----------|------|------|----------|
| Br1  | C4   | 1.905(5) | Br2  | C21  | 1.889(5) |
| O1   | C8   | 1.232(5) | O4   | C25  | 1.221(5) |
| O2   | N3   | 1.209(5) | O5   | N6   | 1.206(6) |
| O3   | N3   | 1.207(5) | O6   | N6   | 1.201(6) |
| N1   | C7   | 1.473(5) | N4   | C24  | 1.472(5) |
| N1   | C8   | 1.380(5) | N4   | C25  | 1.381(6) |
| N1   | C15  | 1.400(5) | N4   | C28  | 1.404(6) |
| N2   | C9   | 1.280(5) | N5   | C26  | 1.286(6) |
| N2   | C10  | 1.384(5) | N5   | C27  | 1.391(5) |
| N3   | C11  | 1.482(6) | N6   | C32  | 1.485(6) |
| C1   | C2   | 1.387(6) | C18  | C19  | 1.390(6) |
| C1   | C6   | 1.368(6) | C18  | C23  | 1.378(6) |
| C1   | C7   | 1.500(6) | C18  | C24  | 1.505(6) |
| C2   | C3   | 1.382(6) | C19  | C20  | 1.356(7) |
| C3   | C4   | 1.367(6) | C20  | C21  | 1.390(7) |
| C4   | C5   | 1.378(6) | C21  | C22  | 1.376(6) |
| C5   | C6   | 1.381(6) | C22  | C23  | 1.373(6) |
| C8   | C9   | 1.455(6) | C25  | C26  | 1.455(7) |
| C10  | C11  | 1.391(5) | C27  | C28  | 1.396(6) |
| C10  | C15  | 1.390(5) | C27  | C32  | 1.389(6) |
| C11  | C12  | 1.379(6) | C28  | C29  | 1.390(6) |
| C12  | C13  | 1.410(6) | C29  | C30  | 1.372(7) |
| C12  | C17  | 1.509(5) | C30  | C31  | 1.415(7) |
| C13  | C14  | 1.380(5) | C30  | C34  | 1.507(6) |
| C13  | C16  | 1.507(6) | C31  | C32  | 1.365(6) |
| C14  | C15  | 1.392(5) | C31  | C33  | 1.501(7) |

**Table 5 Bond Angles for 2aa.**

| Atom Atom Atom | Angle/°  | Atom Atom Atom | Angle/°  |
|----------------|----------|----------------|----------|
| C8 N1 C7       | 118.7(3) | C25 N4 C24     | 118.4(4) |
| C8 N1 C15      | 120.9(4) | C25 N4 C28     | 121.5(4) |
| C15 N1 C7      | 120.3(3) | C28 N4 C24     | 120.1(4) |
| C9 N2 C10      | 116.7(4) | C26 N5 C27     | 115.7(4) |
| O2 N3 C11      | 118.2(4) | O5 N6 C32      | 116.7(6) |
| O3 N3 O2       | 124.8(5) | O6 N6 O5       | 126.2(5) |
| O3 N3 C11      | 117.0(4) | O6 N6 C32      | 117.1(6) |
| C2 C1 C7       | 120.8(4) | C19 C18 C24    | 121.9(5) |
| C6 C1 C2       | 119.4(4) | C23 C18 C19    | 117.1(5) |
| C6 C1 C7       | 119.8(4) | C23 C18 C24    | 120.9(4) |
| C3 C2 C1       | 120.7(4) | C20 C19 C18    | 122.1(5) |
| C4 C3 C2       | 118.4(4) | C19 C20 C21    | 119.2(5) |
| C3 C4 Br1      | 118.8(4) | C20 C21 Br2    | 119.4(4) |
| C3 C4 C5       | 122.1(4) | C22 C21 Br2    | 120.0(5) |
| C5 C4 Br1      | 119.1(4) | C22 C21 C20    | 120.6(5) |
| C4 C5 C6       | 118.4(4) | C23 C22 C21    | 118.5(5) |
| C1 C6 C5       | 120.9(4) | C22 C23 C18    | 122.5(5) |
| N1 C7 C1       | 112.9(3) | N4 C24 C18     | 111.6(4) |
| O1 C8 N1       | 122.2(4) | O4 C25 N4      | 122.7(5) |
| O1 C8 C9       | 122.8(4) | O4 C25 C26     | 123.0(5) |
| N1 C8 C9       | 115.0(4) | N4 C25 C26     | 114.3(5) |
| N2 C9 C8       | 126.2(4) | N5 C26 C25     | 127.2(5) |
| N2 C10 C11     | 119.6(4) | N5 C27 C28     | 123.5(4) |
| N2 C10 C15     | 123.1(4) | C32 C27 N5     | 118.3(4) |
| C11 C10 C15    | 117.3(4) | C32 C27 C28    | 118.2(4) |
| C10 C11 N3     | 115.5(4) | C27 C28 N4     | 117.5(4) |
| C12 C11 N3     | 119.5(4) | C29 C28 N4     | 123.7(4) |
| C12 C11 C10    | 124.9(4) | C29 C28 C27    | 118.8(4) |
| C11 C12 C13    | 116.3(4) | C30 C29 C28    | 121.7(4) |
| C11 C12 C17    | 122.4(4) | C29 C30 C31    | 120.4(4) |
| C13 C12 C17    | 121.3(4) | C29 C30 C34    | 119.1(5) |
| C12 C13 C16    | 120.0(4) | C31 C30 C34    | 120.5(5) |
| C14 C13 C12    | 120.2(4) | C30 C31 C33    | 121.1(5) |
| C14 C13 C16    | 119.8(4) | C32 C31 C30    | 116.7(5) |
| C13 C14 C15    | 121.7(4) | C32 C31 C33    | 122.2(5) |
| C10 C15 N1     | 118.0(3) | C27 C32 N6     | 116.8(4) |
| C10 C15 C14    | 119.5(3) | C31 C32 N6     | 119.0(5) |
| C14 C15 N1     | 122.5(4) | C31 C32 C27    | 124.2(4) |

**Table 6 Torsion Angles for 2aa.**

| <b>A</b> | <b>B</b> | <b>C</b> | <b>D</b> | <b>Angle/°</b> | <b>A</b> | <b>B</b> | <b>C</b> | <b>D</b> | <b>Angle/°</b> |
|----------|----------|----------|----------|----------------|----------|----------|----------|----------|----------------|
| Br1      | C4       | C5       | C6       | -177.9(3)      | Br2      | C21      | C22      | C23      | 178.1(4)       |
| O1       | C8       | C9       | N2       | 177.7(5)       | O4       | C25      | C26      | N5       | -176.6(5)      |
| O2       | N3       | C11      | C10      | -83.0(5)       | O5       | N6       | C32      | C27      | -79.3(7)       |
| O2       | N3       | C11      | C12      | 96.7(5)        | O5       | N6       | C32      | C31      | 99.8(6)        |
| O3       | N3       | C11      | C10      | 96.9(5)        | O6       | N6       | C32      | C27      | 97.9(6)        |
| O3       | N3       | C11      | C12      | -83.4(6)       | O6       | N6       | C32      | C31      | -82.9(7)       |
| N1       | C8       | C9       | N2       | -2.7(7)        | N4       | C25      | C26      | N5       | 5.0(7)         |
| N2       | C10      | C11      | N3       | 0.7(6)         | N4       | C28      | C29      | C30      | 178.4(5)       |
| N2       | C10      | C11      | C12      | -179.1(4)      | N5       | C27      | C28      | N4       | 2.0(7)         |
| N2       | C10      | C15      | N1       | 0.0(6)         | N5       | C27      | C28      | C29      | -179.3(4)      |
| N2       | C10      | C15      | C14      | 178.7(4)       | N5       | C27      | C32      | N6       | -2.0(7)        |
| N3       | C11      | C12      | C13      | -180.0(4)      | N5       | C27      | C32      | C31      | 178.8(5)       |
| N3       | C11      | C12      | C17      | -0.6(6)        | C18      | C19      | C20      | C21      | -0.9(8)        |
| C1       | C2       | C3       | C4       | -0.4(6)        | C19      | C18      | C23      | C22      | -0.8(7)        |
| C2       | C1       | C6       | C5       | -1.4(6)        | C19      | C18      | C24      | N4       | -118.1(5)      |
| C2       | C1       | C7       | N1       | 48.3(5)        | C19      | C20      | C21      | Br2      | -178.5(4)      |
| C2       | C3       | C4       | Br1      | 178.2(3)       | C19      | C20      | C21      | C22      | 1.9(8)         |
| C2       | C3       | C4       | C5       | -1.2(6)        | C20      | C21      | C22      | C23      | -2.2(8)        |
| C3       | C4       | C5       | C6       | 1.4(7)         | C21      | C22      | C23      | C18      | 1.7(8)         |
| C4       | C5       | C6       | C1       | -0.1(7)        | C23      | C18      | C19      | C20      | 0.4(8)         |
| C6       | C1       | C2       | C3       | 1.6(6)         | C23      | C18      | C24      | N4       | 58.8(6)        |
| C6       | C1       | C7       | N1       | -132.2(4)      | C24      | N4       | C25      | O4       | -5.8(7)        |
| C7       | N1       | C8       | O1       | -0.9(6)        | C24      | N4       | C25      | C26      | 172.6(4)       |
| C7       | N1       | C8       | C9       | 179.5(4)       | C24      | N4       | C28      | C27      | -175.6(4)      |
| C7       | N1       | C15      | C10      | -178.3(3)      | C24      | N4       | C28      | C29      | 5.8(7)         |
| C7       | N1       | C15      | C14      | 3.1(6)         | C24      | C18      | C19      | C20      | 177.4(5)       |
| C7       | C1       | C2       | C3       | -178.8(4)      | C24      | C18      | C23      | C22      | -177.8(4)      |
| C7       | C1       | C6       | C5       | 179.1(4)       | C25      | N4       | C24      | C18      | -102.1(5)      |
| C8       | N1       | C7       | C1       | -107.2(4)      | C25      | N4       | C28      | C27      | 2.5(6)         |
| C8       | N1       | C15      | C10      | -1.5(6)        | C25      | N4       | C28      | C29      | -176.1(4)      |
| C8       | N1       | C15      | C14      | 179.9(4)       | C26      | N5       | C27      | C28      | -2.7(7)        |
| C9       | N2       | C10      | C11      | -179.8(4)      | C26      | N5       | C27      | C32      | 178.1(4)       |
| C9       | N2       | C10      | C15      | 0.1(6)         | C27      | N5       | C26      | C25      | -1.0(7)        |
| C10      | N2       | C9       | C8       | 1.3(7)         | C27      | C28      | C29      | C30      | -0.2(8)        |
| C10      | C11      | C12      | C13      | -0.2(6)        | C28      | N4       | C24      | C18      | 76.0(5)        |

|        |     |     |           |     |     |     |     |           |
|--------|-----|-----|-----------|-----|-----|-----|-----|-----------|
| C10C11 | C12 | C17 | 179.2(4)  | C28 | N4  | C25 | O4  | 176.0(4)  |
| C11C10 | C15 | N1  | 179.9(4)  | C28 | N4  | C25 | C26 | -5.5(6)   |
| C11C10 | C15 | C14 | -1.4(6)   | C28 | C27 | C32 | N6  | 178.8(5)  |
| C11C12 | C13 | C14 | -0.1(6)   | C28 | C27 | C32 | C31 | -0.3(8)   |
| C11C12 | C13 | C16 | -178.7(4) | C28 | C29 | C30 | C31 | 1.1(9)    |
| C12C13 | C14 | C15 | -0.3(6)   | C28 | C29 | C30 | C34 | -179.4(5) |
| C13C14 | C15 | N1  | 179.8(4)  | C29 | C30 | C31 | C32 | -1.5(9)   |
| C13C14 | C15 | C10 | 1.2(6)    | C29 | C30 | C31 | C33 | 179.2(6)  |
| C15N1  | C7  | C1  | 69.7(5)   | C30 | C31 | C32 | N6  | -178.0(5) |
| C15N1  | C8  | O1  | -177.8(4) | C30 | C31 | C32 | C27 | 1.2(8)    |
| C15N1  | C8  | C9  | 2.6(6)    | C32 | C27 | C28 | N4  | -178.8(4) |
| C15C10 | C11 | N3  | -179.2(4) | C32 | C27 | C28 | C29 | -0.2(7)   |
| C15C10 | C11 | C12 | 1.0(6)    | C33 | C31 | C32 | N6  | 1.3(9)    |
| C16C13 | C14 | C15 | 178.2(4)  | C33 | C31 | C32 | C27 | -179.6(5) |
| C17C12 | C13 | C14 | -179.5(4) | C34 | C30 | C31 | C32 | 179.0(5)  |
| C17C12 | C13 | C16 | 1.9(6)    | C34 | C30 | C31 | C33 | -0.3(9)   |

**Table 7 Hydrogen Atom Coordinates ( $\text{\AA}\times 10^4$ ) and Isotropic Displacement Parameters ( $\text{\AA}^2\times 10^3$ ) for 2aa.**

| Atom | x       | y        | z       | U(eq) |
|------|---------|----------|---------|-------|
| H2   | 1452.39 | 5552.41  | 3140.01 | 56    |
| H3   | 2440.32 | 6661.43  | 3207.34 | 59    |
| H5   | 1861.7  | 10247.19 | 4241.1  | 60    |
| H6   | 880.55  | 9112.51  | 4176.02 | 55    |
| H7A  | 206.52  | 7072.11  | 3956.28 | 50    |
| H7B  | 190.78  | 6519.74  | 3117.74 | 50    |
| H9   | 282.57  | 1481.71  | 3353.4  | 61    |
| H14  | 844.87  | 6725.89  | 5089.12 | 45    |
| H16A | 1764.5  | 6608.68  | 6769.39 | 92    |
| H16B | 1096.57 | 6514.66  | 6991.45 | 92    |
| H16C | 1195.83 | 7587.29  | 6328.78 | 92    |
| H17A | 1405.43 | 2404.43  | 7142.52 | 109   |
| H17B | 1189.4  | 3981.06  | 7388.11 | 109   |
| H17C | 1876.37 | 3772.4   | 7232.2  | 109   |
| H19  | 3475.55 | 3810.95  | 6824.92 | 85    |
| H20  | 3695.1  | 6081.64  | 7411.97 | 86    |
| H22  | 2585.32 | 8103.54  | 5594.79 | 77    |
| H23  | 2384.33 | 5797.67  | 5015.38 | 65    |

|      |         |         |         |     |
|------|---------|---------|---------|-----|
| H24A | 2986.33 | 2264.67 | 5785.37 | 72  |
| H24B | 2317.11 | 2847.04 | 5349.39 | 72  |
| H26  | 2531.21 | 3547.92 | 2910.61 | 70  |
| H29  | 3988.83 | 2587.9  | 5862.82 | 70  |
| H33A | 5676.45 | 2570.74 | 4108.46 | 170 |
| H33B | 5781.78 | 1470.39 | 4810.96 | 170 |
| H33C | 5875.62 | 3205.54 | 4945.21 | 170 |
| H34A | 5009.43 | 2234.8  | 6529.63 | 162 |
| H34B | 5546.16 | 2958.68 | 6172.04 | 162 |
| H34C | 5409.45 | 1228.58 | 6083.82 | 162 |

## 7. Characterization data of products

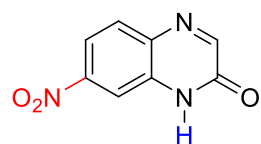

**7-nitroquinoxalin-2(1H)-one (2a)**<sup>1</sup>: Yellow solid; (30.2 mg, 79% yield); m.p. 266.1-266.6 °C; <sup>1</sup>H NMR (400 MHz, DMSO-*d*<sub>6</sub>) δ 12.72 (s, 1H), 8.33 (s, 1H), 8.10-8.01 (m, 2H), 7.98 (d, *J* = 8.7 Hz, 1H); <sup>13</sup>C NMR (101 MHz, DMSO-*d*<sub>6</sub>) δ 155.6, 154.5, 147.6, 135.3, 132.4, 130.2, 117.5, 111.2. **ESI-MS**: calcd for C<sub>8</sub>H<sub>6</sub>N<sub>3</sub>O<sub>3</sub> [M + H]<sup>+</sup>: 192.0403, found: 192.0404.

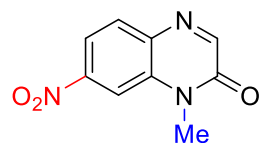

**1-methyl-7-nitroquinoxalin-2(1H)-one (2b)**<sup>2</sup>: Brown solid; (50.1 mg, 61% yield); m.p. 173.3-174.5 °C; <sup>1</sup>H NMR (400 MHz, CDCl<sub>3</sub>) δ 8.42 (s, 1H), 8.23 (d, *J* = 2.2 Hz, 1H), 8.18 (dd, *J* = 8.7, 2.3 Hz, 1H), 8.04 (d, *J* = 8.7 Hz, 1H), 3.76 (s, 3H); <sup>13</sup>C NMR (101 MHz, CDCl<sub>3</sub>) δ 154.5, 153.8, 148.6, 136.6, 133.9, 131.8, 118.4, 109.9, 29.4. **ESI-MS**: calcd for C<sub>9</sub>H<sub>8</sub>N<sub>3</sub>O<sub>3</sub> [M + H]<sup>+</sup>: 206.0559, found: 206.0560.

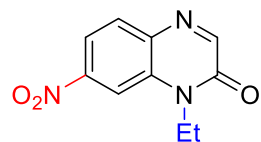

**1-ethyl-7-nitroquinoxalin-2(1H)-one (2c)**: Brown solid; (58.9 mg, 67% yield); m.p. 155.8-156.7 °C; <sup>1</sup>H NMR (500 MHz, DMSO-*d*<sub>6</sub>) δ 8.41 (s, 1H), 8.34 (d, *J* = 2.3 Hz, 1H), 8.15 (dd, *J* = 8.7, 2.3 Hz, 1H), 8.07 (d, *J* = 8.7 Hz, 1H), 4.31 (q, *J* = 7.2 Hz, 2H), 1.26 (t, *J* = 7.2 Hz, 3H); <sup>13</sup>C NMR (126 MHz, DMSO-*d*<sub>6</sub>) δ 153.9, 153.7, 148.3, 136.4, 132.6, 131.3, 117.7, 110.2, 36.9, 12.2. **ESI-MS**: calcd for C<sub>10</sub>H<sub>10</sub>N<sub>3</sub>O<sub>3</sub> [M + H]<sup>+</sup>: 220.0716, found:

<sup>1</sup> H. Zhu, R. Mishra, L. Yuan, S. F. Abdul Salam, J. Liu, G. Gray, A. D. Sterling, M. Wunderlich, J. Landero-Figueroa, J. T. Garrett and E. J. Merino, *ChemMedChem*, 2019, **14**, 1933.

<sup>2</sup> A. Carrer, J.-D. Brion, S. Messaoudi and M. Alami, *Org. Lett.* 2013, **15**, 5606.

220.0717.

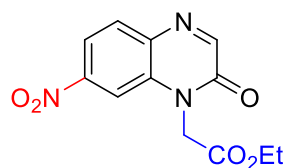

**ethyl 2-(7-nitro-2-oxoquinoxalin-1(2H)-yl)acetate (2d):**

Brown solid; (66.5 mg, 60% yield); m.p. 146.6-148.0 °C; <sup>1</sup>H NMR (500 MHz, CDCl<sub>3</sub>) δ 8.46 (s, 1H), 8.19 (dd, *J* = 8.7, 1.5 Hz, 1H), 8.06 (d, *J* = 8.7 Hz, 1H), 7.99 (d, *J* = 2.1 Hz, 1H), 5.05 (s, 2H), 4.30 (q, *J* = 7.1 Hz, 2H), 1.33 (t, *J* = 7.1 Hz, 3H); <sup>13</sup>C NMR (126 MHz, CDCl<sub>3</sub>) δ 166.4, 153.9, 153.5, 148.6, 136.7, 133.1, 132.2, 118.7, 109.5, 62.8, 43.5, 14.2. **ESI-MS:** calcd for C<sub>12</sub>H<sub>11</sub>N<sub>3</sub>O<sub>5</sub>Na [M + Na]<sup>+</sup>: 300.0591, found: 300.0591.

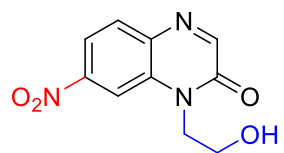

**1-(2-hydroxyethyl)-7-nitroquinoxalin-2(1H)-one (2e):**

Brown solid; (33.9 mg, 36% yield); m.p. 179.6-180.1 °C; <sup>1</sup>H NMR (500 MHz, DMSO-*d*<sub>6</sub>) δ 8.51 (s, 1H), 8.42 (s, 1H), 8.12 (dd, *J* = 8.7, 1.9 Hz, 1H), 8.03 (d, *J* = 8.8 Hz, 1H), 4.97 (t, *J* = 5.8 Hz, 1H), 4.35 (t, *J* = 5.6 Hz, 2H), 3.74 (q, *J* = 5.6 Hz, 2H); <sup>13</sup>C NMR (126 MHz, DMSO-*d*<sub>6</sub>) δ 154.1, 153.9, 147.8, 136.1, 133.9, 130.9, 117.5, 111.4, 58.0, 44.6. **ESI-MS:** calcd for C<sub>10</sub>H<sub>9</sub>N<sub>3</sub>O<sub>4</sub>Na [M + Na]<sup>+</sup>: 258.0485, found: 258.0484.

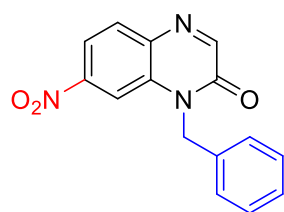

**1-benzyl-7-nitroquinoxalin-2(1H)-one (2f):** Brown solid;

(56.3 mg, 50% yield); m.p. 163.6-164.4 °C; <sup>1</sup>H NMR (500 MHz, DMSO-*d*<sub>6</sub>) δ 8.54 (s, 1H), 8.20 (s, 1H), 8.13 (d, *J* = 8.8 Hz, 1H), 8.08 (d, *J* = 8.7 Hz, 1H), 7.37-7.31 (m, 5H), 5.56 (s, 2H); <sup>13</sup>C NMR (126 MHz, DMSO-*d*<sub>6</sub>) δ 154.3, 154.2, 147.8, 136.5, 135.2, 132.9, 131.2, 128.9, 127.6, 126.9, 118.0, 110.7, 44.9. **ESI-MS:** calcd for C<sub>15</sub>H<sub>12</sub>N<sub>3</sub>O<sub>3</sub> [M + H]<sup>+</sup>: 282.0873, found: 282.0872.

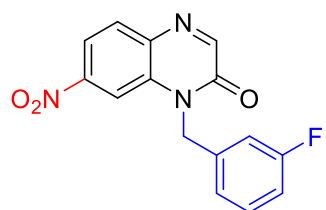

**1-(3-fluorobenzyl)-7-nitroquinoxalin-2(1H)-one (2g):**

Red solid; (63.4 mg, 53% yield); m.p. 169.6-169.8 °C; <sup>1</sup>H NMR (500 MHz, CDCl<sub>3</sub>) δ 8.52 (s, 1H), 8.15 (d, *J* = 11.1 Hz, 2H), 8.05 (d, *J* = 8.6 Hz, 1H), 7.34 (dd, *J* = 14.1, 7.6 Hz, 1H), 7.12 (d, *J* = 7.7 Hz, 1H), 6.99 (dd, *J* = 18.5, 9.2 Hz, 2H), 5.50 (s, 2H); <sup>13</sup>C NMR (126 MHz, CDCl<sub>3</sub>) δ 163.4 (d, *J* = 248.1 Hz), 154.5, 153.8, 148.6, 136.9, 136.6 (d, *J* = 7.3 Hz), 132.9, 132.1, 131.1 (d, *J* = 8.4 Hz), 122.9 (d, *J* = 2.8 Hz), 118.6, 115.7 (d, *J* = 21.1 Hz), 114.3 (d, *J* = 22.3 Hz), 110.4, 45.6 (d, *J* = 1.5 Hz). **ESI-MS:** calcd for

C<sub>15</sub>H<sub>11</sub>FN<sub>3</sub>O<sub>3</sub> [M + H]<sup>+</sup>: 300.0778, found: 300.0779.

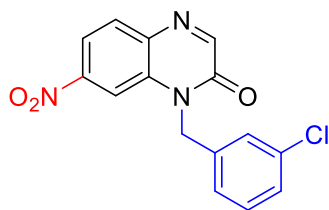

**1-(3-chlorobenzyl)-7-nitroquinoxalin-2(1H)-one (2h):**

Brown solid; (51.8 mg, 41% yield); m.p. 123.9-124.7 °C;

<sup>1</sup>H NMR (500 MHz, DMSO-*d*<sub>6</sub>) δ 8.53 (s, 1H), 8.18 (d, *J* = 1.6 Hz, 1H), 8.13 (dd, *J* = 8.8, 2.1 Hz, 1H), 8.08 (d, *J* = 8.7

Hz, 1H), 7.47 (s, 1H), 7.40 – 7.32 (m, 2H), 7.30 (d, *J* = 7.2 Hz, 1H), 5.56 (s, 2H); <sup>13</sup>C

NMR (126 MHz, DMSO-*d*<sub>6</sub>) δ 154.4, 154.3, 147.9, 137.8, 136.5, 133.5, 132.9, 131.2,

130.7, 127.7, 126.9, 125.5, 118.1, 110.5, 44.4. **ESI-MS:** calcd for C<sub>15</sub>H<sub>10</sub>ClN<sub>3</sub>O<sub>3</sub> [M +

H]<sup>+</sup>: 316.0484, found: 316.0496.

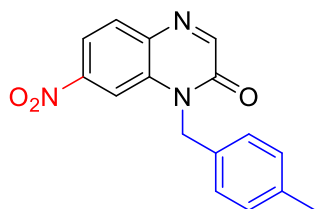

**1-(4-methylbenzyl)-7-nitroquinoxalin-2(1H)-one (2i):**

Brown solid; (72.1 mg, 61% yield); m.p. 156.9-157.8 °C; <sup>1</sup>H

NMR (500 MHz, CDCl<sub>3</sub>) δ 8.50 (s, 1H), 8.26 (d, *J* = 2.1 Hz, 1H), 8.11 (dd, *J* = 8.7, 2.1 Hz, 1H), 8.01 (d, *J* = 8.7 Hz, 1H),

7.22 (d, *J* = 8.0 Hz, 2H), 7.15 (d, *J* = 7.9 Hz, 2H), 5.47 (s, 2H), 2.31 (s, 3H); <sup>13</sup>C NMR

(126 MHz, CDCl<sub>3</sub>) δ 154.7, 153.9, 148.5, 138.4, 136.9, 133.1, 131.9, 131.2, 130.1,

127.4, 118.3, 110.7, 45.9, 21.2. **ESI-MS:** calcd for C<sub>16</sub>H<sub>13</sub>N<sub>3</sub>O<sub>3</sub>Na [M + Na]<sup>+</sup>:

318.0849, found: 318.0850.

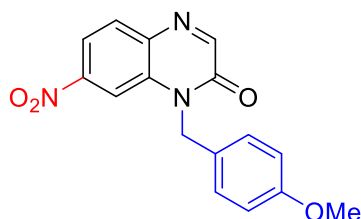

**1-(4-methoxybenzyl)-7-nitroquinoxalin-2(1H)-one**

**(2j):** Brown solid; (56.0 mg, 45% yield); m.p. 134.5-

135.9 °C; <sup>1</sup>H NMR (500 MHz, DMSO-*d*<sub>6</sub>) δ 8.53 (s, 1H),

8.25 (d, *J* = 2.2 Hz, 1H), 8.12 (dd, *J* = 8.8, 2.2 Hz, 1H),

8.07 (d, *J* = 8.7 Hz, 1H), 7.29 (d, *J* = 8.7 Hz, 2H), 6.90 (d, *J* = 8.7 Hz, 2H), 5.49 (s, 2H),

3.71 (s, 3H); <sup>13</sup>C NMR (126 MHz, DMSO-*d*<sub>6</sub>) δ 158.7, 154.3, 154.3, 147.8, 136.4,

132.8, 131.2, 128.4, 127.0, 117.9, 114.3, 110.8, 55.1, 44.3. **ESI-MS:** calcd for

C<sub>16</sub>H<sub>13</sub>N<sub>3</sub>O<sub>4</sub>Na [M + Na]<sup>+</sup>: 334.0798, found: 334.0798.

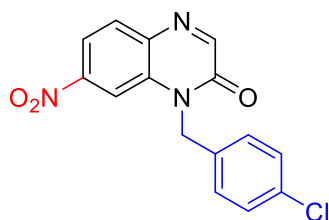

**1-(4-chlorobenzyl)-7-nitroquinoxalin-2(1H)-one (2k):**

Red solid; (74.5 mg, 59% yield); m.p. 149.1-150.0 °C; <sup>1</sup>H

NMR (500 MHz, CDCl<sub>3</sub>) δ 8.49 (s, 1H), 8.16 (d, *J* = 2.2

Hz, 1H), 8.13 (dd, *J* = 8.7, 2.2 Hz, 1H), 8.03 (d, *J* = 8.7 Hz,



1H), 7.33-7.30 (m, 2H), 7.27-7.24 (m, 2H), 5.46 (s, 2H); <sup>13</sup>C NMR (126 MHz, CDCl<sub>3</sub>) δ 154.5, 153.8, 148.5, 136.9, 134.6, 132.9, 132.7, 132.1, 129.7, 128.8, 118.5, 110.4, 45.5. **ESI-MS:** calcd for C<sub>15</sub>H<sub>11</sub>ClN<sub>3</sub>O<sub>3</sub> [M + H]<sup>+</sup>: 316.0484, found: 316.0481.

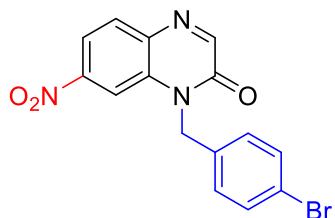

**1-(4-bromobenzyl)-7-nitroquinoxalin-2(1H)-one (2l):**

Brown solid; (86.4 mg, 60% yield); m.p. 177.1-177.4 °C;

<sup>1</sup>H NMR (500 MHz, CDCl<sub>3</sub>) δ 8.51 (s, 1H), 8.18-8.12 (m, 2H), 8.04 (d, *J* = 8.7 Hz, 1H), 7.48 (d, *J* = 8.4 Hz, 2H), 7.20

(d, *J* = 8.3 Hz, 2H), 5.46 (s, 2H); <sup>13</sup>C NMR (126 MHz, CDCl<sub>3</sub>) δ 154.5, 153.8, 148.5, 136.9, 133.2, 132.9, 132.6, 132.1, 129.1, 122.6, 118.5, 110.3, 45.6. **ESI-MS:** calcd for C<sub>15</sub>H<sub>11</sub>BrN<sub>3</sub>O<sub>3</sub> [M + H]<sup>+</sup>: 359.9978, found: 359.9979.

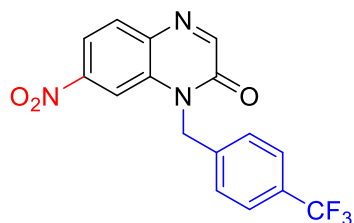

**7-nitro-1-(4-(trifluoromethyl)benzyl)quinoxalin-**

**2(1H)-one (2m):** Yellow solid (86.6 mg, 62% yield). <sup>1</sup>H

NMR (500 MHz, CDCl<sub>3</sub>) δ 8.53 (s, 1H), 8.15 (d, *J* = 8.1 Hz, 2H), 8.06 (d, *J* = 8.5 Hz, 1H), 7.62 (d, *J* = 8.0 Hz,

2H), 7.43 (d, *J* = 8.0 Hz, 2H), 5.56 (s, 2H); <sup>13</sup>C NMR (126 MHz, CDCl<sub>3</sub>) δ 154.5, 153.8, 148.6, 138.2, 136.9, 132.9, 132.2, 130.9 (q, *J* = 33.5 Hz), 127.7, 126.5 (q, *J* = 3.5 Hz), 123.9 (q, *J* = 272.7 Hz), 118.7, 110.2, 45.7; <sup>19</sup>F NMR (471 MHz, Chloroform-*d*) δ -62.78. **ESI-MS:** calcd for C<sub>16</sub>H<sub>11</sub>F<sub>3</sub>N<sub>3</sub>O<sub>3</sub> [M + H]<sup>+</sup>: 350.0747, found: 350.0750.

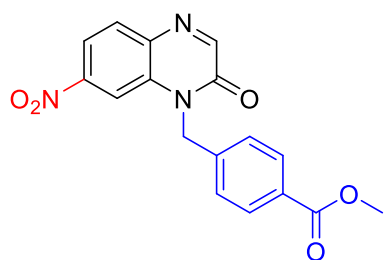

**methyl 4-((7-nitro-2-oxoquinoxalin-1(2H)-**

**yl)methyl)benzoate (2n):** Yellow solid (78.7 mg, 58%

yield). <sup>1</sup>H NMR (500 MHz, CDCl<sub>3</sub>) δ 8.53 (s, 1H), 8.14 (d, *J* = 9.5 Hz, 2H), 8.05 (d, *J* = 4.9 Hz, 1H), 8.02 (d, *J* = 8.0 Hz, 2H), 7.36 (d, *J* = 7.9 Hz, 2H), 5.56 (s, 2H),

3.89 (s, 3H); <sup>13</sup>C NMR (126 MHz, CDCl<sub>3</sub>) δ 166.5, 154.5, 153.8, 148.6, 139.1, 136.9, 132.9, 132.1, 130.7, 130.5, 127.2, 118.6, 110.4, 52.4, 45.9. **ESI-MS:** calcd for C<sub>17</sub>H<sub>14</sub>N<sub>3</sub>O<sub>5</sub> [M + H]<sup>+</sup>: 340.0931, found: 350.0936.

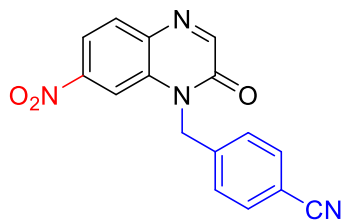

**4-((7-nitro-2-oxoquinoxalin-1(2H)-yl)methyl)benzonitrile (2o)**

Yellow solid (73.5 mg, 60% yield). <sup>1</sup>H NMR (500 MHz, CDCl<sub>3</sub>) δ 8.53 (s, 1H), 8.17 (d, *J* = 8.7 Hz, 1H), 8.08 (d, *J* = 8.4 Hz, 2H), 7.67 (d, *J* = 7.9 Hz, 2H),

7.42 (d, *J* = 7.9 Hz, 2H), 5.56 (s, 2H); <sup>13</sup>C NMR (126 MHz, CDCl<sub>3</sub>) δ 154.4, 153.7, 148.6, 139.4, 136.9, 133.3, 132.8, 132.3, 128.0, 118.8, 118.2, 112.8, 110.0, 45.7. **ESI-MS:** calcd for C<sub>16</sub>H<sub>11</sub>N<sub>4</sub>O<sub>3</sub> [M + H]<sup>+</sup>: 307.0827, found: 307.0834.

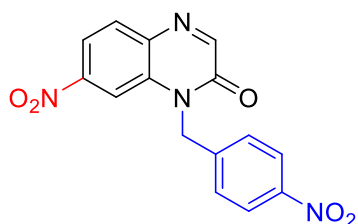

**7-nitro-1-(4-nitrobenzyl)quinoxalin-2(1H)-one (2p)**

Yellow solid (65.3 mg, 50% yield). <sup>1</sup>H NMR (500 MHz, DMSO) δ 8.56 (s, 1H), 8.19 (d, *J* = 8.4 Hz, 2H), 8.15 (d, *J* = 9.4 Hz, 2H), 8.11 (d, *J* = 8.5 Hz, 1H), 7.61 (d, *J* = 8.3

Hz, 2H), 5.71 (s, 2H); <sup>13</sup>C NMR (126 MHz, DMSO) δ 154.3, 154.2, 148.0, 147.0, 143.0, 136.5, 132.9, 131.3, 128.1, 123.9, 118.2, 110.4, 44.6. **ESI-MS:** calcd for C<sub>15</sub>H<sub>11</sub>N<sub>4</sub>O<sub>5</sub> [M + H]<sup>+</sup>: 327.0723, found: 327.0730.

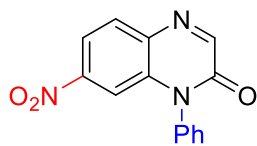

**7-nitro-1-phenylquinoxalin-2(1H)-one (2q)**

Yellow solid (73.8 mg, 69% yield). <sup>1</sup>H NMR (500 MHz, CDCl<sub>3</sub>) δ 8.51 (s, 1H), 8.14 (d, *J* = 8.7 Hz, 1H), 8.07 (d, *J* = 8.7 Hz, 1H), 7.71 –

7.61 (m, 3H), 7.59 (s, 1H), 7.31 (d, *J* = 7.5 Hz, 2H); <sup>13</sup>C NMR (126 MHz, CDCl<sub>3</sub>) δ 154.4, 154.2, 148.5, 136.3, 134.6, 134.2, 131.5, 131.0, 130.6, 128.1, 118.5, 111.5. **ESI-MS:** calcd for C<sub>14</sub>H<sub>10</sub>N<sub>3</sub>O<sub>3</sub> [M + H]<sup>+</sup>: 268.0726, found: 268.0727.

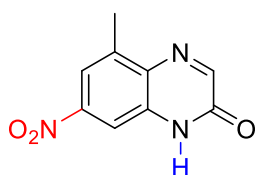

**5-methyl-7-nitroquinoxalin-2(1H)-one (2r)**

Brown solid; (34.2 mg, 42% yield); m.p. 220.9–221.5 °C; <sup>1</sup>H NMR (500 MHz, DMSO-*d*<sub>6</sub>) δ 12.67 (s, 1H), 8.34 (s, 1H), 7.96 (s, 1H), 7.92 (s, 1H), 2.64 (s, 3H); <sup>13</sup>C NMR (126 MHz, DMSO-*d*<sub>6</sub>) δ 154.5, 154.0,

147.1, 139.5, 133.8, 132.3, 117.9, 108.9, 17.1. **ESI-MS:** calcd for C<sub>9</sub>H<sub>7</sub>N<sub>3</sub>O<sub>3</sub>Na [M + Na]<sup>+</sup>: 228.0379, found: 228.0387.

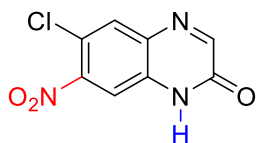

**6-chloro-7-nitroquinoxalin-2(1H)-one (2s)**<sup>3</sup>

Brown solid; (25.3 mg, 28% yield); m.p. 224.6–225.1 °C; <sup>1</sup>H NMR (500 MHz,

<sup>3</sup> K. Aoki, T. Obata, Y. Yamazaki, Y. Mori, H. Hirokawa, J. Koseki, T. Hattori, K. Niitsu, S. Takeda, M. Aburada and K.

DMSO-*d*<sub>6</sub>) δ 12.76 (s, 1H), 8.35 (s, 1H), 8.18 (s, 1H), 7.89 (s, 1H); <sup>13</sup>C NMR (126 MHz, DMSO-*d*<sub>6</sub>) δ 156.3, 154.5, 147.3, 134.1, 131.5, 131.2, 118.3, 113.2. **ESI-MS:** calcd for C<sub>8</sub>H<sub>5</sub>CIN<sub>3</sub>O<sub>3</sub> [M + H]<sup>+</sup>: 226.0014, found: 226.0023.

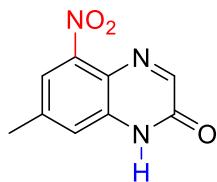

**7-methyl-5-nitroquinoxalin-2(1H)-one (2u):** Yellow solid; (25.4 mg, 31% yield); m.p. 221.4-223.7 °C; <sup>1</sup>H NMR (500 MHz, DMSO-*d*<sub>6</sub>) δ 12.75 (s, 1H), 8.21 (s, 1H), 7.61 (s, 1H), 7.28 (s, 1H), 2.45 (s, 3H); <sup>13</sup>C NMR (126 MHz, DMSO-*d*<sub>6</sub>) δ 154.7, 153.1, 147.4, 141.8, 133.0, 121.5, 118.6, 117.8, 21.1. **ESI-MS:** calcd for C<sub>9</sub>H<sub>8</sub>N<sub>3</sub>O<sub>3</sub> [M + H]<sup>+</sup>: 206.0560, found: 206.0569.

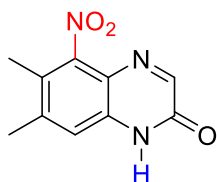

**6,7-dimethyl-5-nitroquinoxalin-2(1H)-one (2v):** White solid; (42.1 mg, 48% yield); m.p. 229.1-229.6 °C; <sup>1</sup>H NMR (500 MHz, DMSO-*d*<sub>6</sub>) δ 12.69 (s, 1H), 8.16 (s, 1H), 7.24 (s, 1H), 2.39 (s, 3H), 2.17 (s, 3H); <sup>13</sup>C NMR (126 MHz, DMSO-*d*<sub>6</sub>) δ 154.8, 152.9, 147.8, 142.0, 130.6, 121.9, 121.7, 117.3, 20.3, 13.4. **ESI-MS:** calcd for C<sub>10</sub>H<sub>10</sub>N<sub>3</sub>O<sub>3</sub> [M + H]<sup>+</sup>: 220.0716, found: 220.0717.

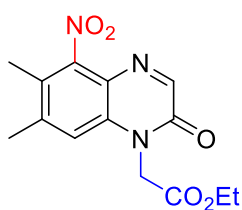

**ethyl 2-(6,7-dimethyl-5-nitro-2-oxoquinoxalin-1(2H)-yl)acetate (2w):** White solid; (67.2 mg, 55% yield); m.p. 206.1-207.8 °C; <sup>1</sup>H NMR (500 MHz, CDCl<sub>3</sub>) δ 8.28 (s, 1H), 6.99 (s, 1H), 4.98 (s, 2H), 4.26 (q, *J* = 7.1 Hz, 2H), 2.46 (s, 3H), 2.26 (s, 3H), 1.29 (t, *J* = 7.1 Hz, 3H); <sup>13</sup>C NMR (126 MHz, CDCl<sub>3</sub>) δ 166.6, 154.1, 150.8, 149.7, 142.7, 131.1, 123.6, 123.5, 115.2, 62.6, 43.4, 21.4, 14.2, 13.9. **ESI-MS:** calcd for C<sub>14</sub>H<sub>15</sub>N<sub>3</sub>O<sub>5</sub>Na [M + Na]<sup>+</sup>: 328.0904, found: 328.0904.

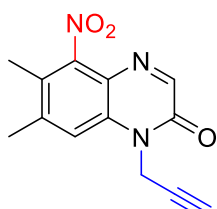

**6,7-dimethyl-5-nitro-1-(prop-2-yn-1-yl)quinoxalin-2(1H)-one (2x):** Yellow solid; (32.4 mg, 63% yield); m.p. 188.1-189.2 °C; <sup>1</sup>H NMR (500 MHz, CDCl<sub>3</sub>) δ 8.26 (d, *J* = 2.7 Hz, 1H), 7.39 (s, 1H), 5.02 (d, *J* = 1.9 Hz, 2H), 2.52 (s, 3H), 2.33 (t, *J* = 2.5 Hz, 1H), 2.28 (d, *J* = 1.3 Hz, 3H); <sup>13</sup>C NMR (126 MHz, CDCl<sub>3</sub>) δ 153.5, 150.9, 149.6, 142.7, 130.3, 123.7, 123.6, 116.2, 77.2, 74.1, 31.5, 21.4, 13.9. **ESI-MS:** calcd for C<sub>13</sub>H<sub>12</sub>N<sub>3</sub>O<sub>3</sub> [M +

$[H]^+$ : 258.0872, found: 258.0873.

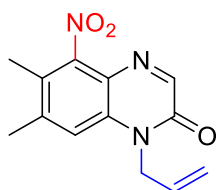

**1-allyl-6,7-dimethyl-5-nitroquinoxalin-2(1H)-one (2y):** Yellow solid; (39.4 mg, 38% yield); m.p. 175.7-176.2 °C;  $^1H$  NMR (500 MHz,  $CDCl_3$ )  $\delta$  8.27 (s, 1H), 7.19 (s, 1H), 5.95-5.87 (m, 1H), 5.29 (d,  $J = 10.4$  Hz, 1H), 5.13 (d,  $J = 17.3$  Hz, 1H), 4.87 (d,  $J = 3.6$  Hz, 2H), 2.47 (s, 3H), 2.26 (s, 3H);  $^{13}C$  NMR (126 MHz,  $CDCl_3$ )  $\delta$  154.3, 151.1, 149.6, 142.3, 131.1, 130.0, 123.7, 123.3, 118.5, 116.2, 44.3, 21.4, 13.9. **ESI-MS:** calcd for  $C_{13}H_{14}N_3O_3$   $[M + H]^+$ : 260.1029, found: 260.1020.

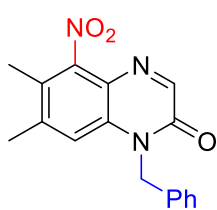

**1-benzyl-6,7-dimethyl-5-nitroquinoxalin-2(1H)-one (2z):** Yellow solid; (90.3 mg, 73% yield); m.p. 181.6-182.0 °C;  $^1H$  NMR (500 MHz,  $CDCl_3$ )  $\delta$  8.34 (s, 1H), 7.35-7.27 (m, 3H), 7.21 (d,  $J = 7.3$  Hz, 2H), 7.17 (s, 1H), 5.46 (s, 2H), 2.37 (s, 3H), 2.22 (s, 3H);  $^{13}C$  NMR (126 MHz,  $CDCl_3$ )  $\delta$  154.8, 151.2, 149.6, 142.4, 134.5, 131.2, 129.3, 128.2, 126.8, 123.8, 123.3, 116.4, 45.8, 21.4, 13.9. **ESI-MS:** calcd for  $C_{17}H_{16}N_3O_3$   $[M + H]^+$ : 310.1185, found: 310.1186.

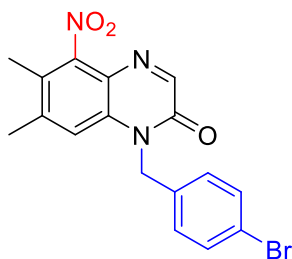

**1-(4-bromobenzyl)-6,7-dimethyl-5-nitroquinoxalin-2(1H)-one (2aa):** White solid; (108.9 mg, 70% yield); m.p. 185.6-187.1 °C;  $^1H$  NMR (500 MHz,  $CDCl_3$ )  $\delta$  8.34 (s, 1H), 7.46 (d,  $J = 8.3$  Hz, 2H), 7.09 (m, 3H), 5.40 (s, 2H), 2.38 (s, 3H), 2.23 (s, 3H);  $^{13}C$  NMR (126 MHz,  $CDCl_3$ )  $\delta$  154.7, 151.1, 149.7, 142.6, 133.5, 132.4, 131.0, 128.6, 123.8, 123.6, 122.2, 116.1, 45.3, 21.5, 13.9. **ESI-MS:** calcd for  $C_{17}H_{15}BrN_3O_3$   $[M + H]^+$ : 388.0292, found: 388.0298.

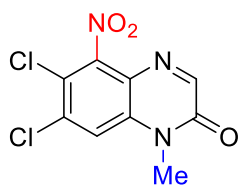

**6,7-dichloro-1-methyl-5-nitroquinoxalin-2(1H)-one (2ab):** Brown solid; (10.5 mg, 10% yield); m.p. 198.5-199.2 °C;  $^1H$  NMR (500 MHz,  $CDCl_3$ )  $\delta$  8.32 (s, 1H), 7.57 (s, 1H), 3.69 (s, 3H);  $^{13}C$  NMR (126 MHz,  $DMSO-d_6$ )  $\delta$  154.2, 154.0, 146.9, 134.3, 134.1, 124.1, 118.4, 116.1, 29.5. **ESI-MS:** calcd for  $C_9H_6Cl_2N_3O_3$   $[M + H]^+$ : 273.9781, found: 273.9789.

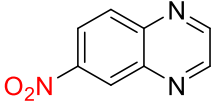 **6-nitroquinoxaline (2ac)**<sup>4</sup>: White solid; (23.1 mg, 33% yield); m.p. 169.6-170.8 °C; <sup>1</sup>H NMR (500 MHz, CDCl<sub>3</sub>) δ 9.03-9.01 (m, 3H), 8.55 (dd, *J* = 9.2, 2.0 Hz, 1H), 8.28 (d, *J* = 9.2 Hz, 1H); <sup>13</sup>C NMR (126 MHz, CDCl<sub>3</sub>) δ 148.1, 147.8, 147.2, 145.5, 142.1, 131.5, 126.1, 123.6. **ESI-MS**: calcd for C<sub>8</sub>H<sub>6</sub>N<sub>3</sub>O<sub>2</sub> [M + H]<sup>+</sup>: 176.0455, found: 176.0459.

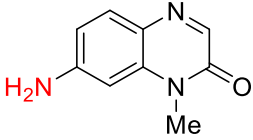 **7-amino-1-methylquinoxalin-2(1H)-one (3b)**: Yellow solid (13.0 mg, 74% yield). <sup>1</sup>H NMR (500 MHz, DMSO-*d*<sub>6</sub>) δ 7.74 (s, 1H), 7.44 (d, *J* = 8.7 Hz, 1H), 6.62 (dd, *J* = 8.7, 2.1 Hz, 1H), 6.49 (d, *J* = 2.1 Hz, 1H), 6.12 (s, 2H), 3.47 (s, 3H); <sup>13</sup>C NMR (126 MHz, DMSO-*d*<sub>6</sub>) δ 155.1, 152.1, 141.3, 135.4, 130.9, 125.2, 111.4, 95.6, 28.2. **ESI-MS**: calcd for C<sub>9</sub>H<sub>10</sub>N<sub>3</sub>O [M + H]<sup>+</sup>: 176.0819, found: 176.0825.

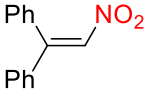 **(2-nitroethene-1,1-diyl)dibenzene (4)**<sup>5</sup>: Yellow solid (56.7 mg, 63% yield) <sup>1</sup>H NMR (500 MHz, Chloroform-*d*) δ 7.49-7.44 (m, 5H), 7.39 (t, *J* = 7.6 Hz, 2H), 7.29 (d, *J* = 7.3 Hz, 2H), 7.23 (d, *J* = 6.0 Hz, 2H); <sup>13</sup>C NMR (126 MHz, Chloroform-*d*) δ 150.6, 137.2, 135.7, 134.5, 131.0, 129.5, 129.0, 129.0, 128.9, 128.6.

<sup>4</sup> S. T. Hazeldine, L. Polin, J. Kushner, J. Paluch, K. White, M. Edelstein, E. Palomino, T. H. Corbett and J. P. Horwitz, *J. Med. Chem.* 2001, **44**, 1758.

<sup>5</sup> X. Guan, H. Zhu, Y. Zhao and T. G. Driver, *Eur. J. Org. Chem.*, 2020, **2020**, 57.

## 8. NMR spectra of products

### 7-nitroquinoxalin-2(1H)-one (2a)

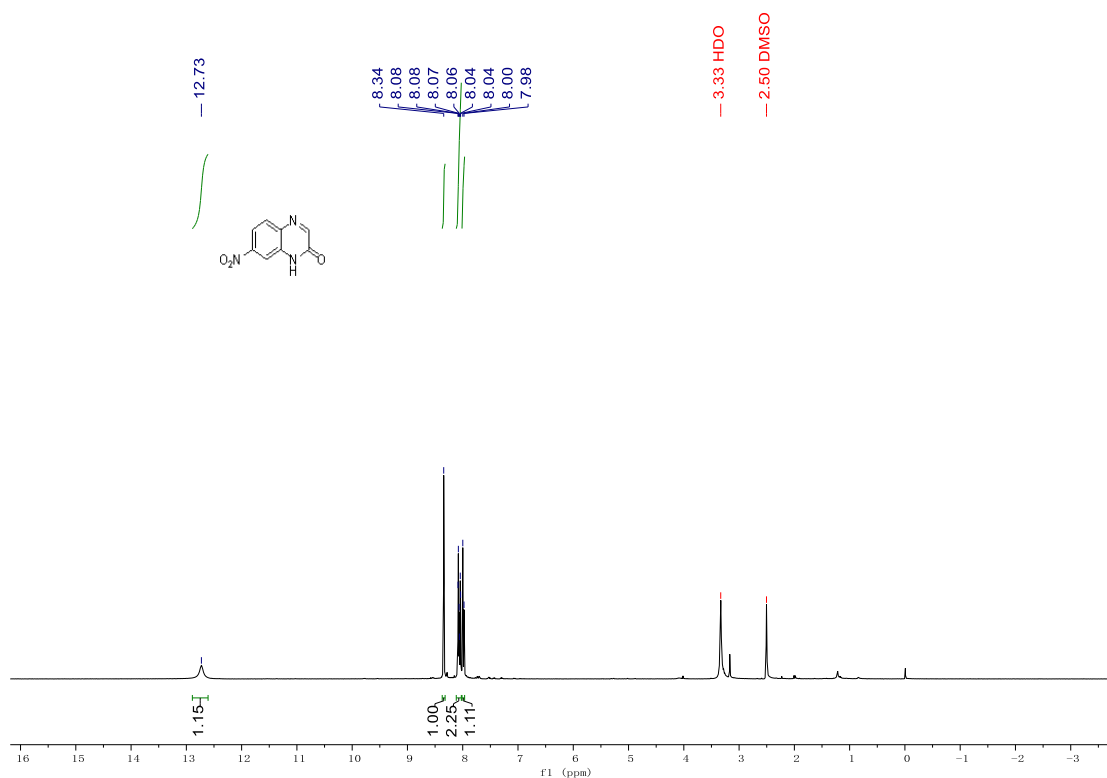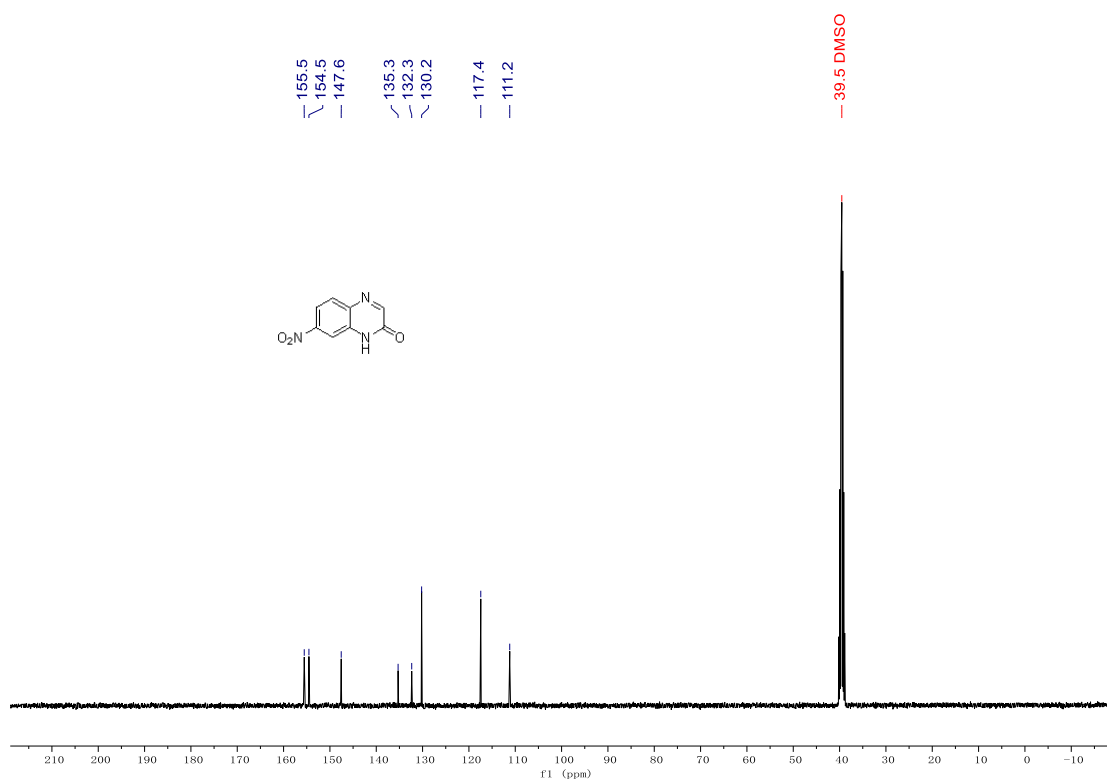

# 1-methyl-7-nitroquinoxalin-2(1H)-one (2b)

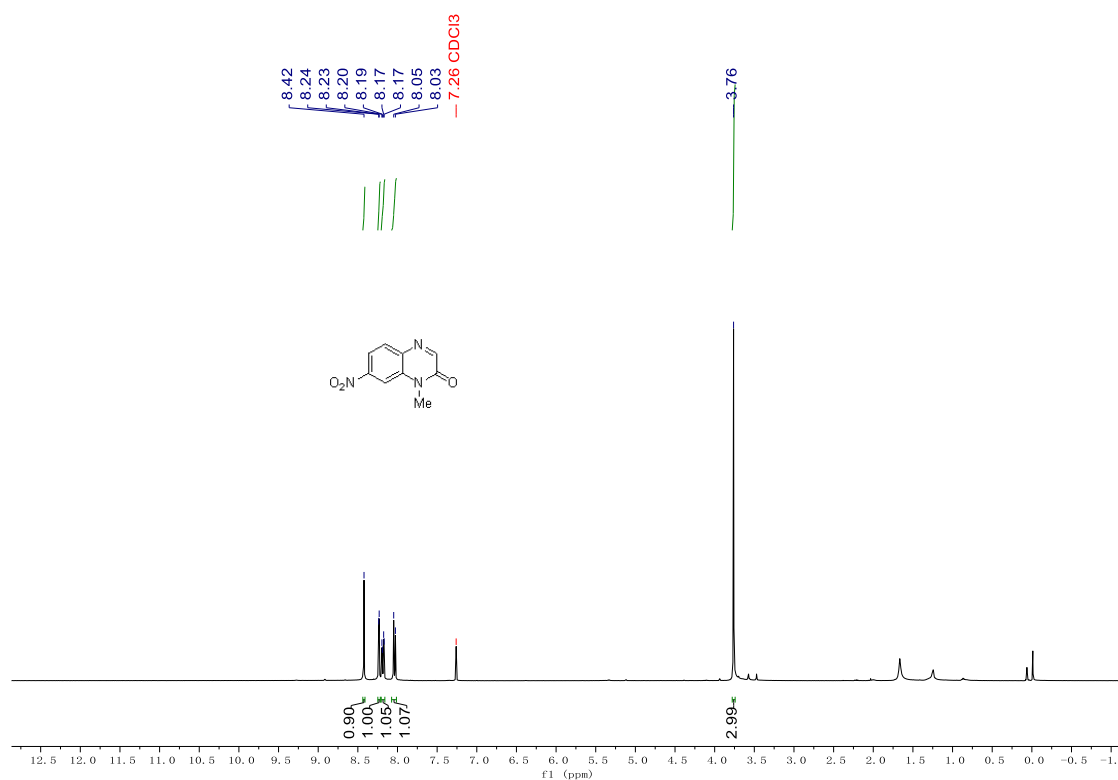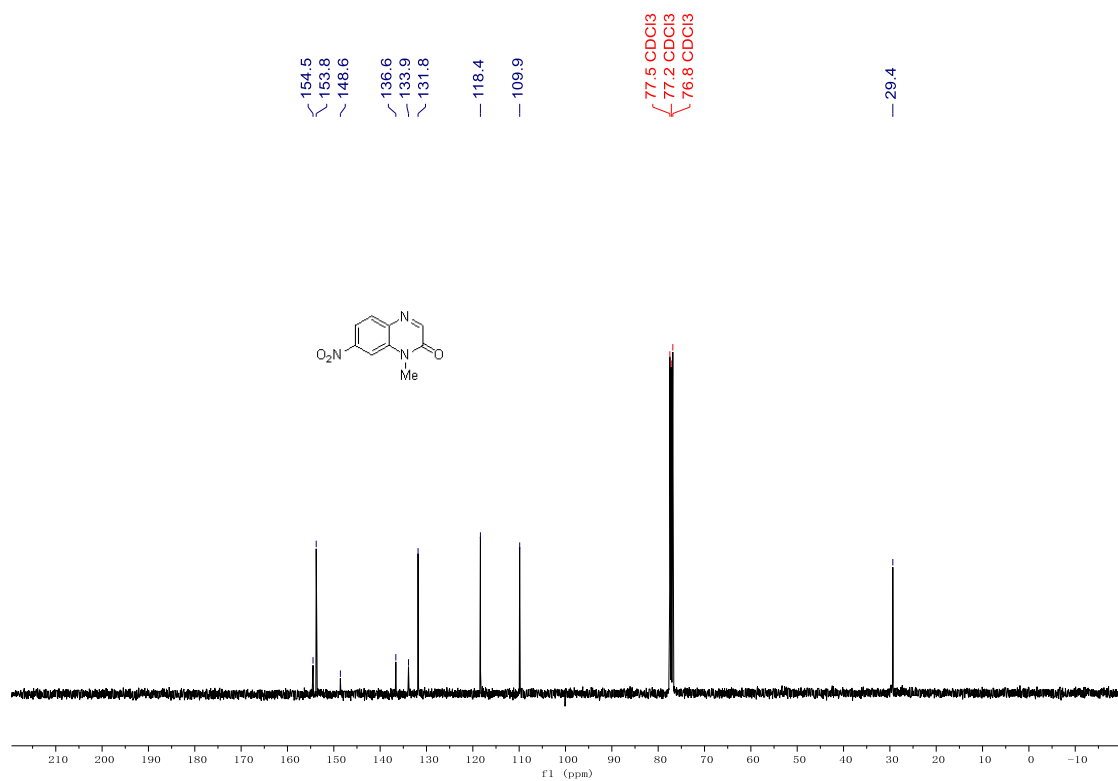

1-ethyl-7-nitroquinoxalin-2(1H)-one (2c)

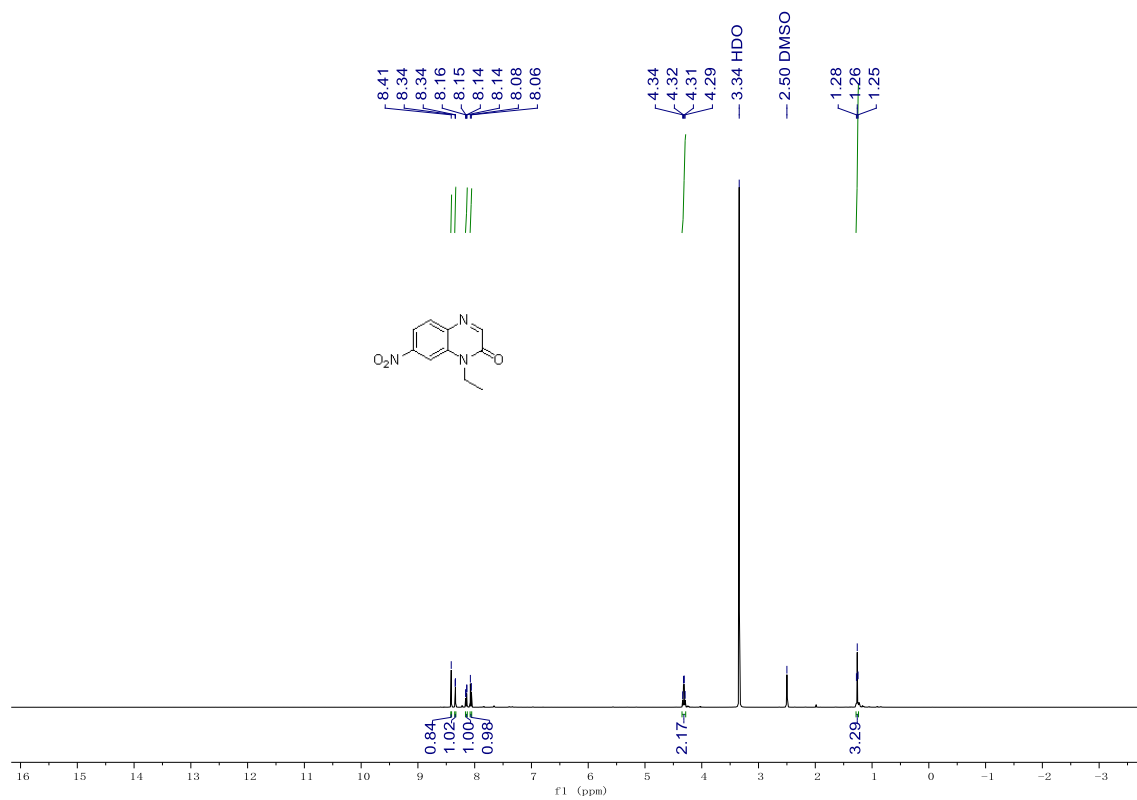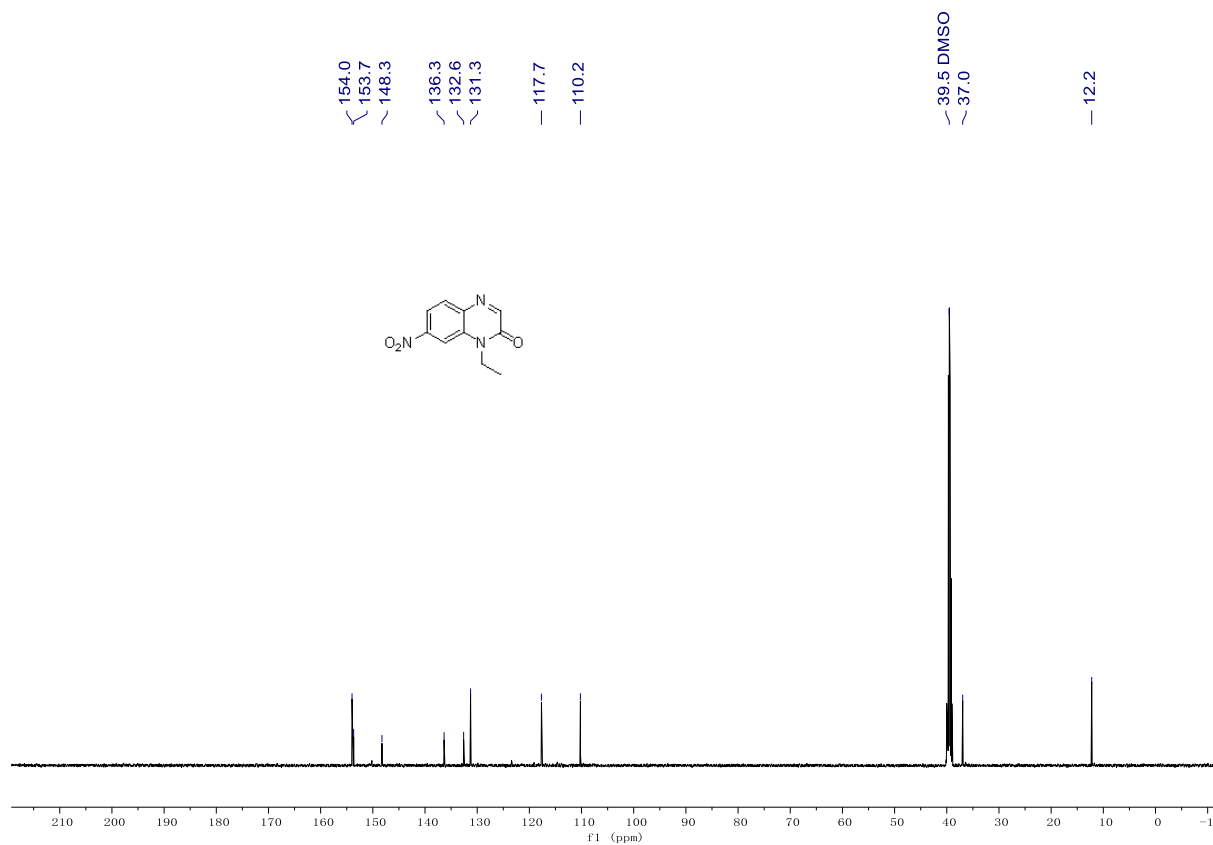



ethyl 2-(7-nitro-2-oxoquinoxalin-1(2H)-yl)acetate (2d)

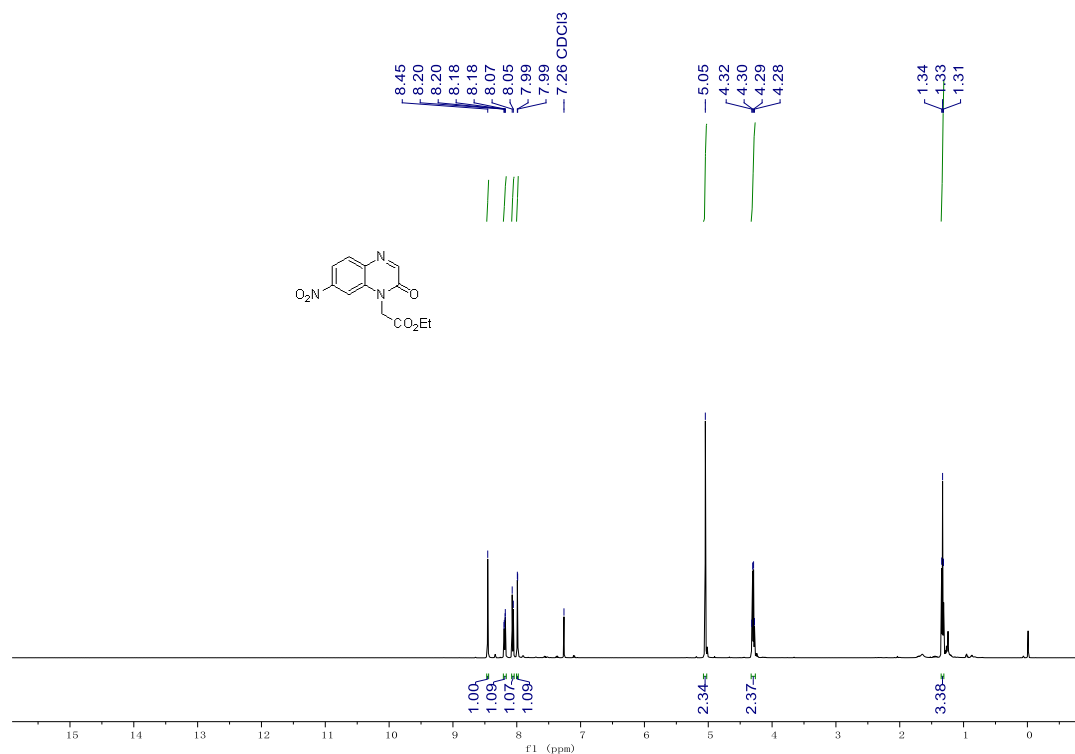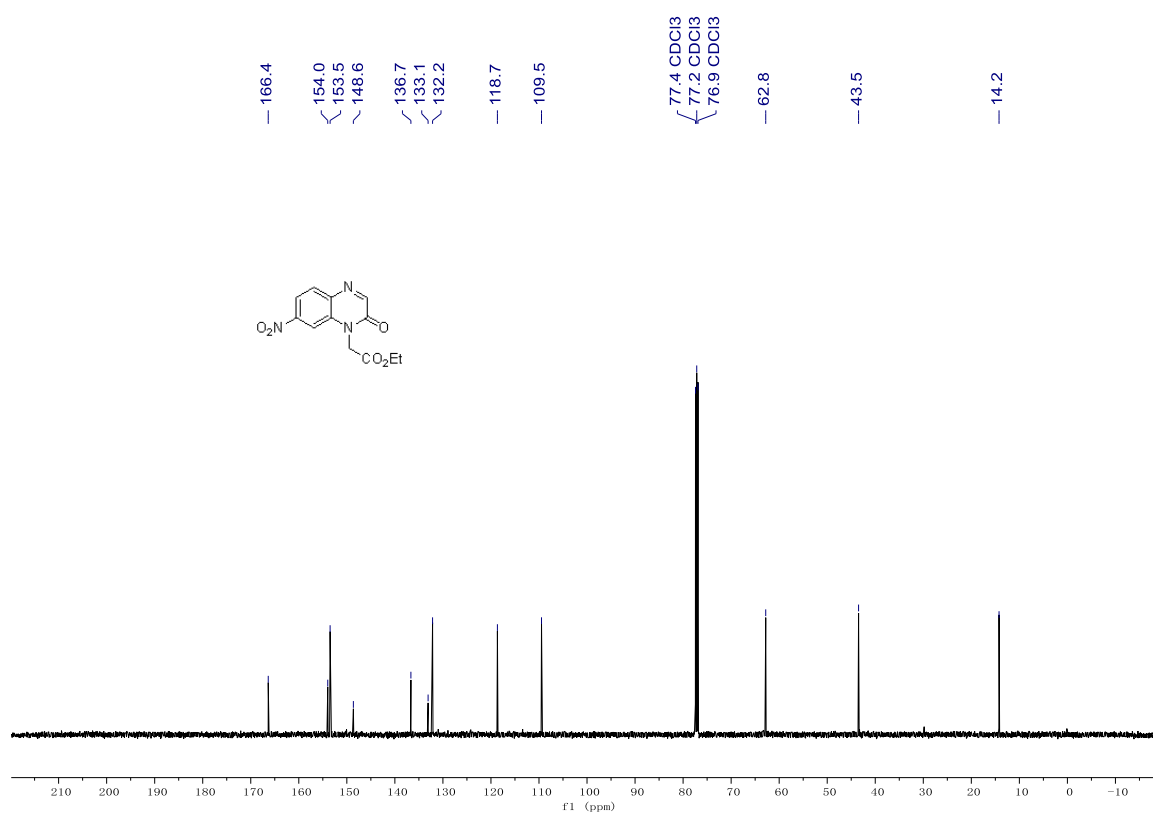

1-(2-hydroxyethyl)-7-nitroquinoxalin-2(1H)-one (2e)

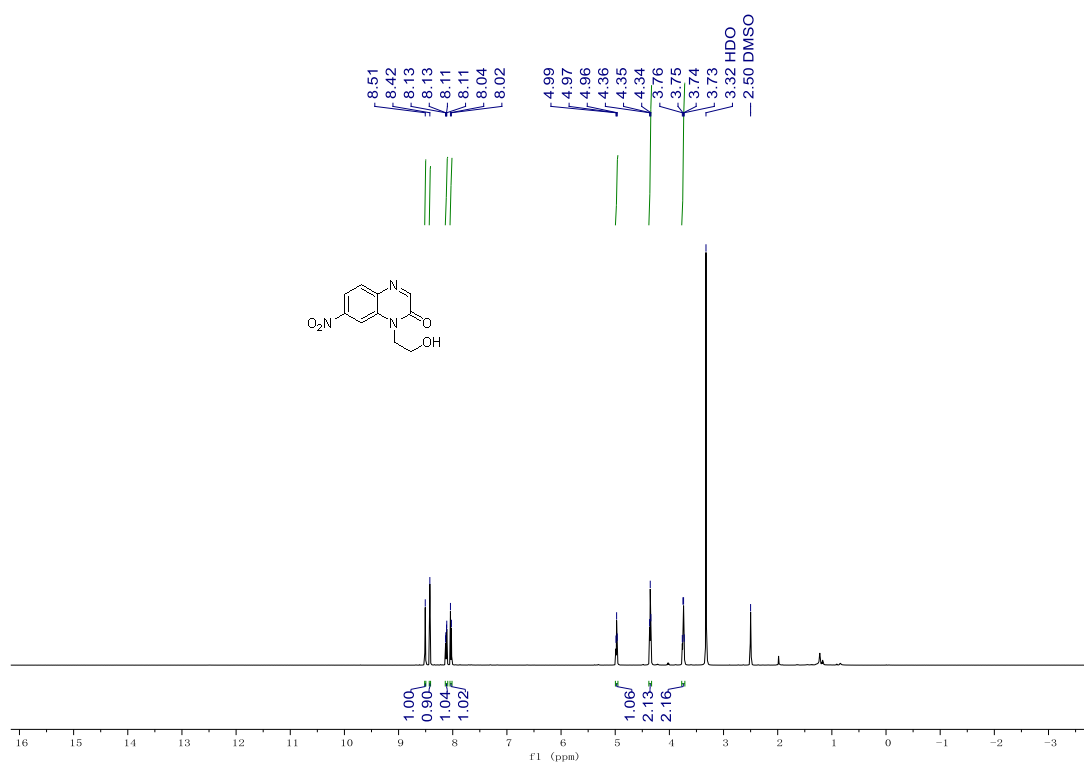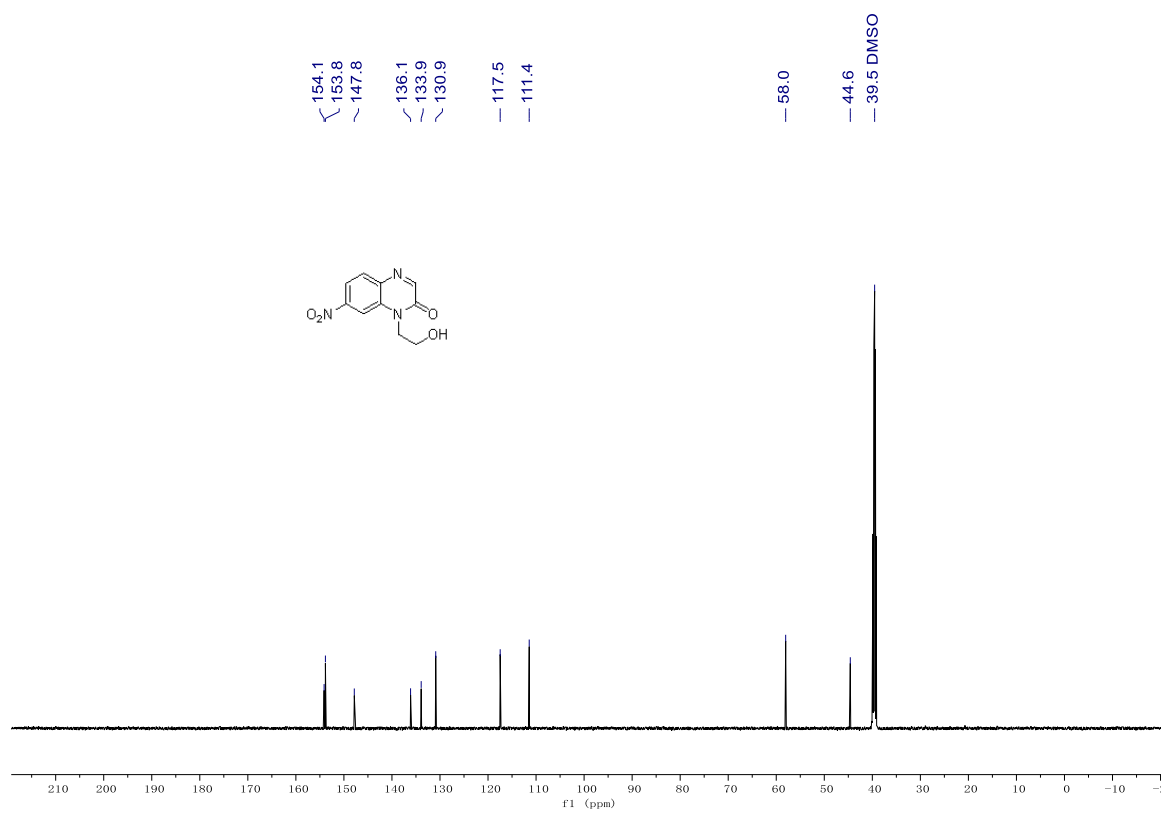

# 1-benzyl-7-nitroquinoxalin-2(1H)-one (2f)

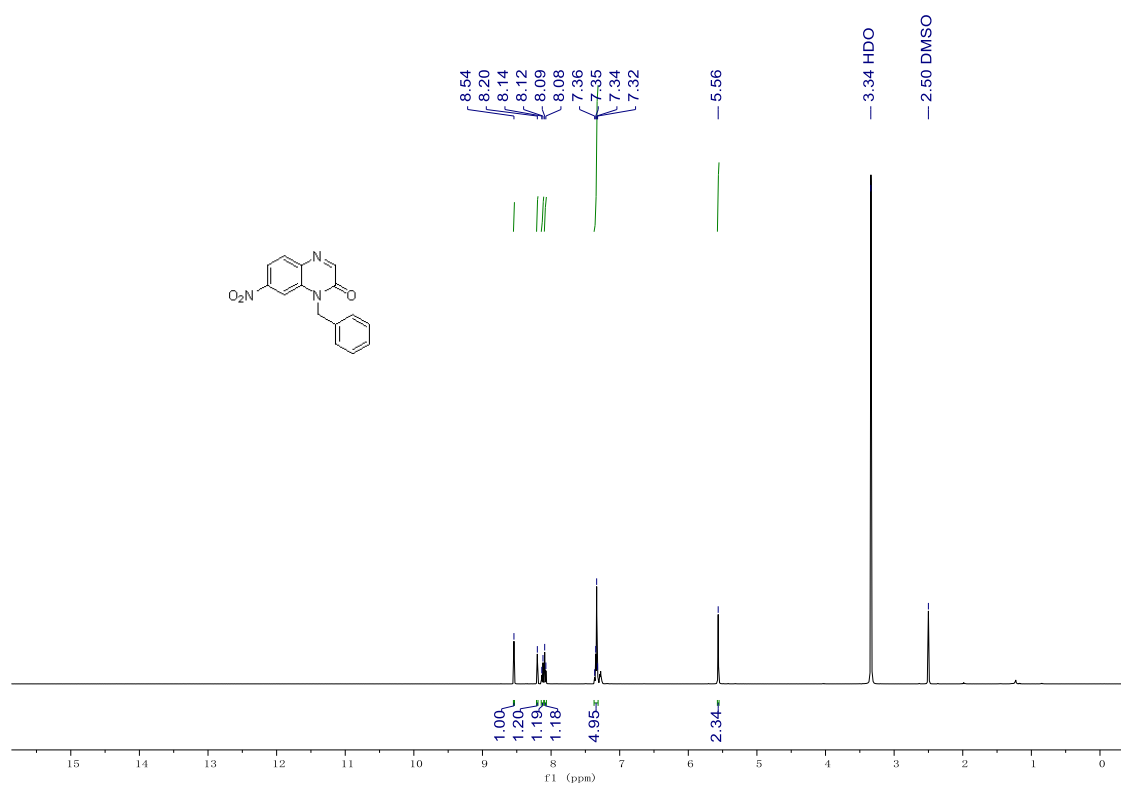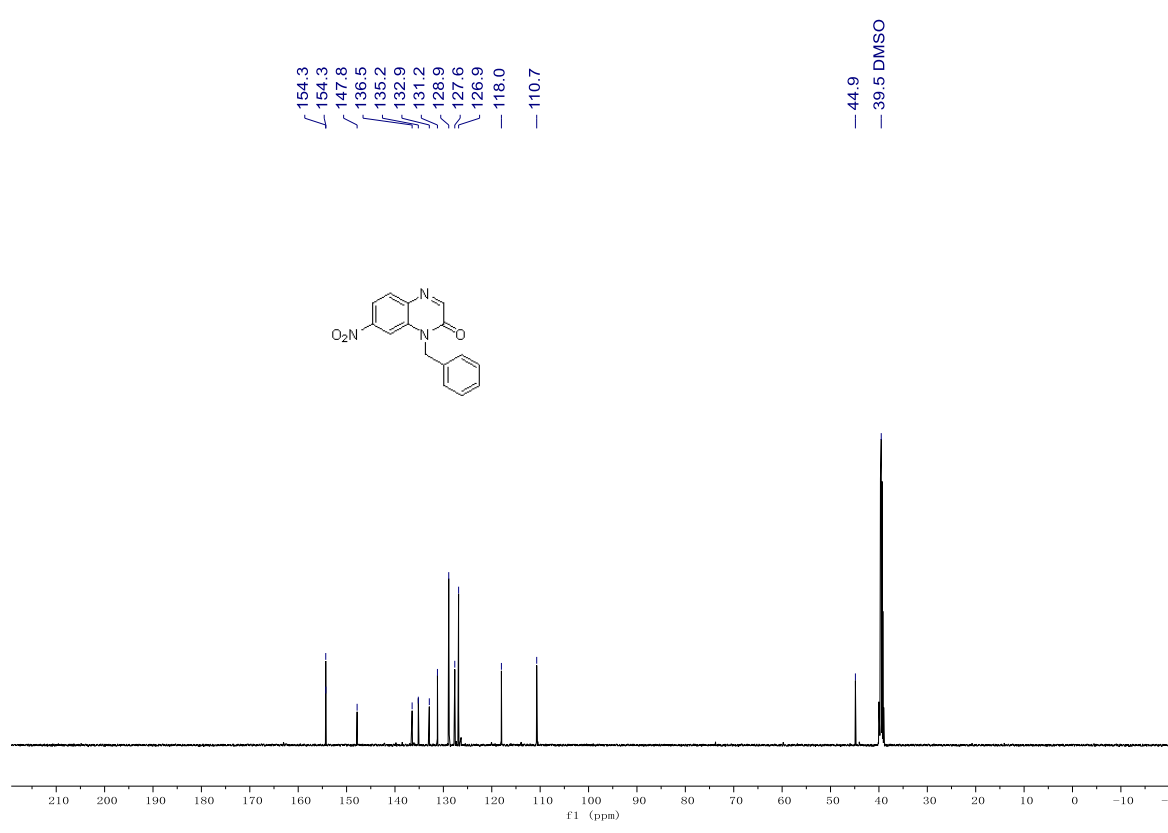

1-(3-fluorobenzyl)-7-nitroquinoxalin-2(1H)-one (2g)

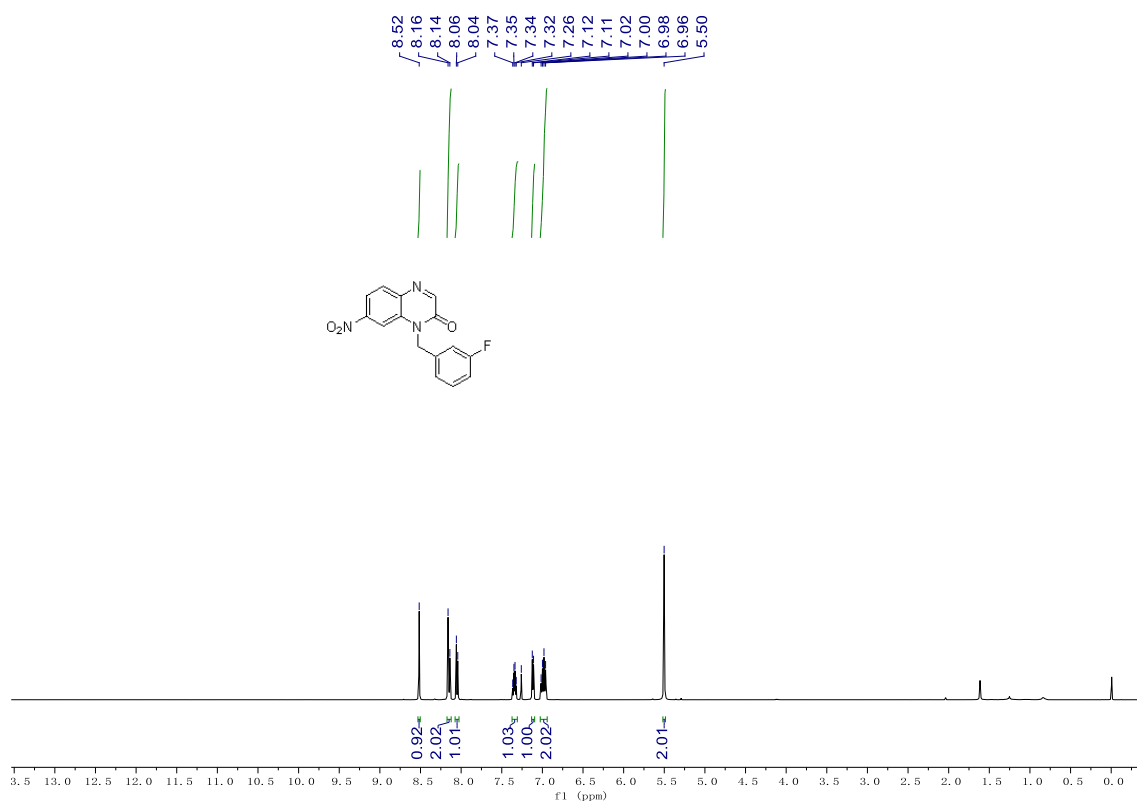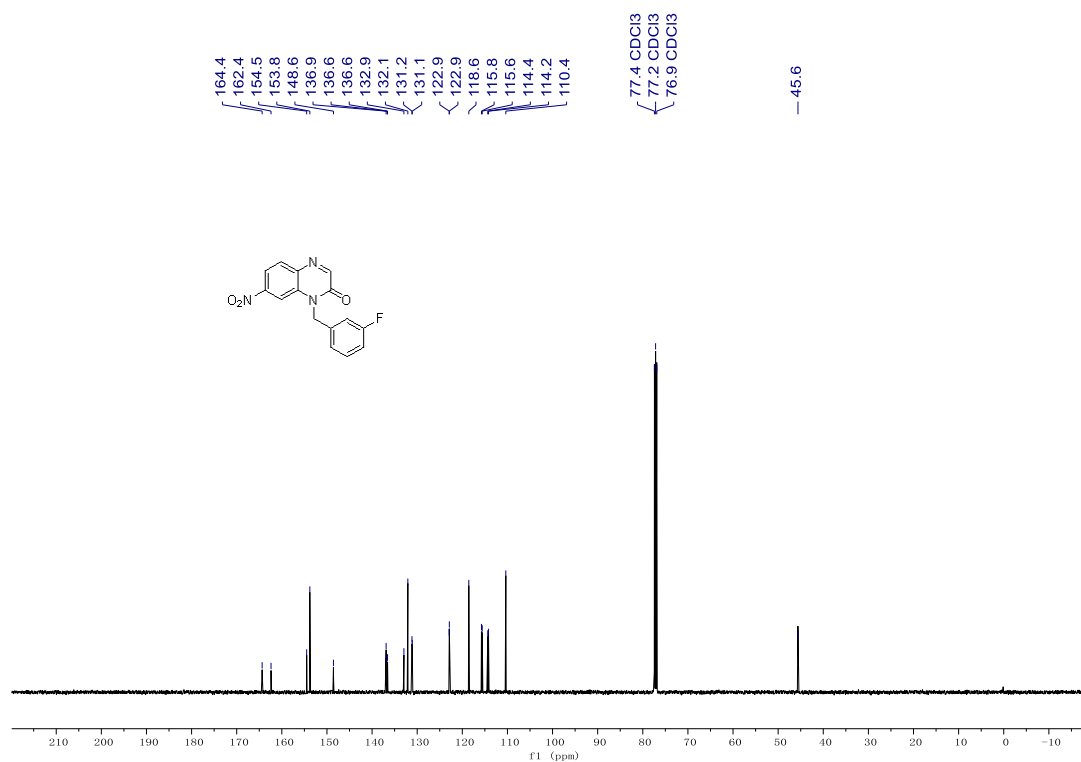

1-(3-chlorobenzyl)-7-nitroquinoxalin-2(1H)-one (2h)

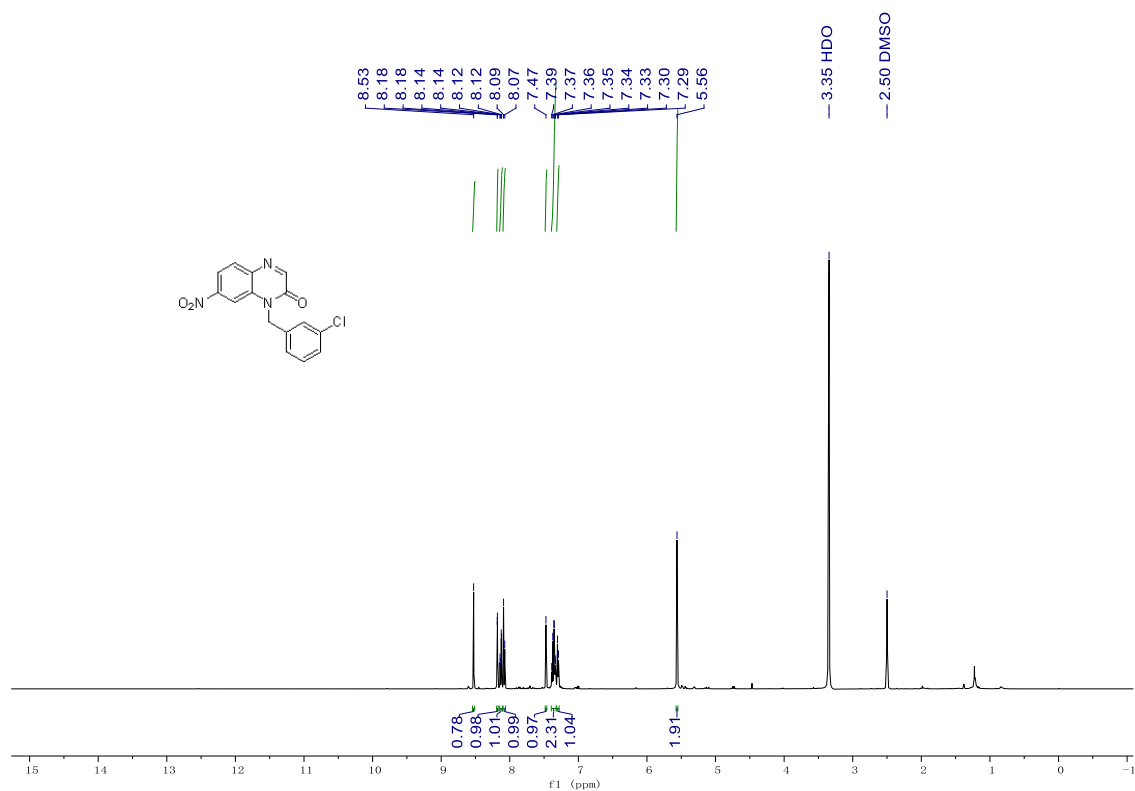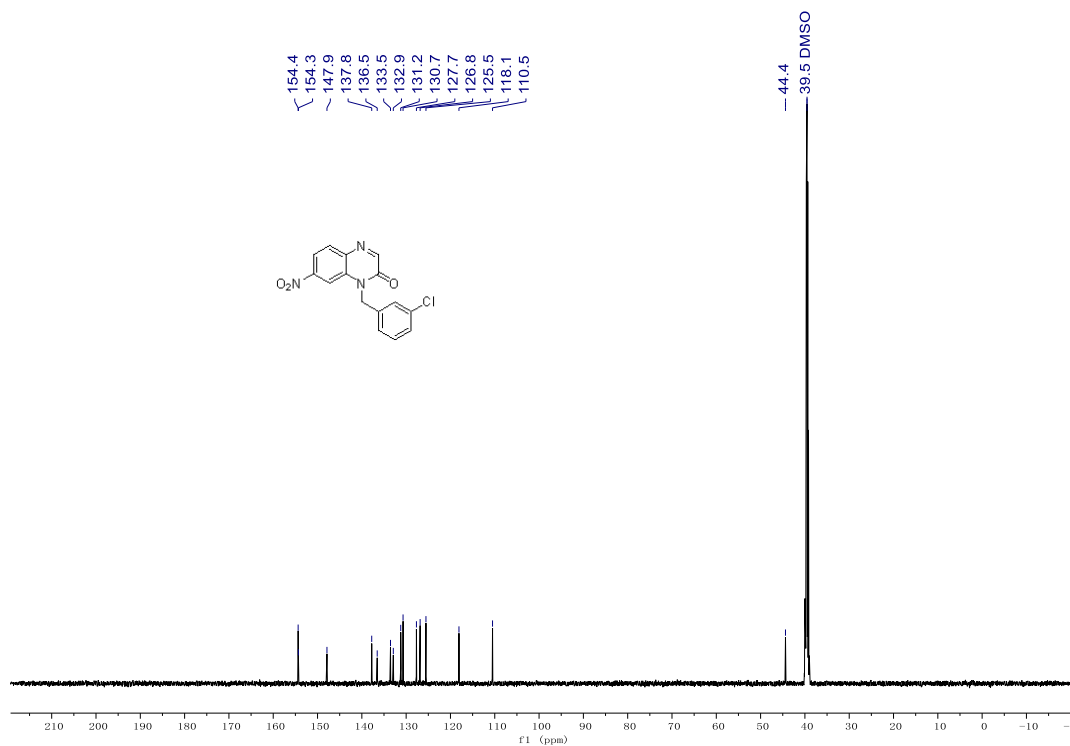

1-(4-methylbenzyl)-7-nitroquinoxalin-2(1H)-one (2i)

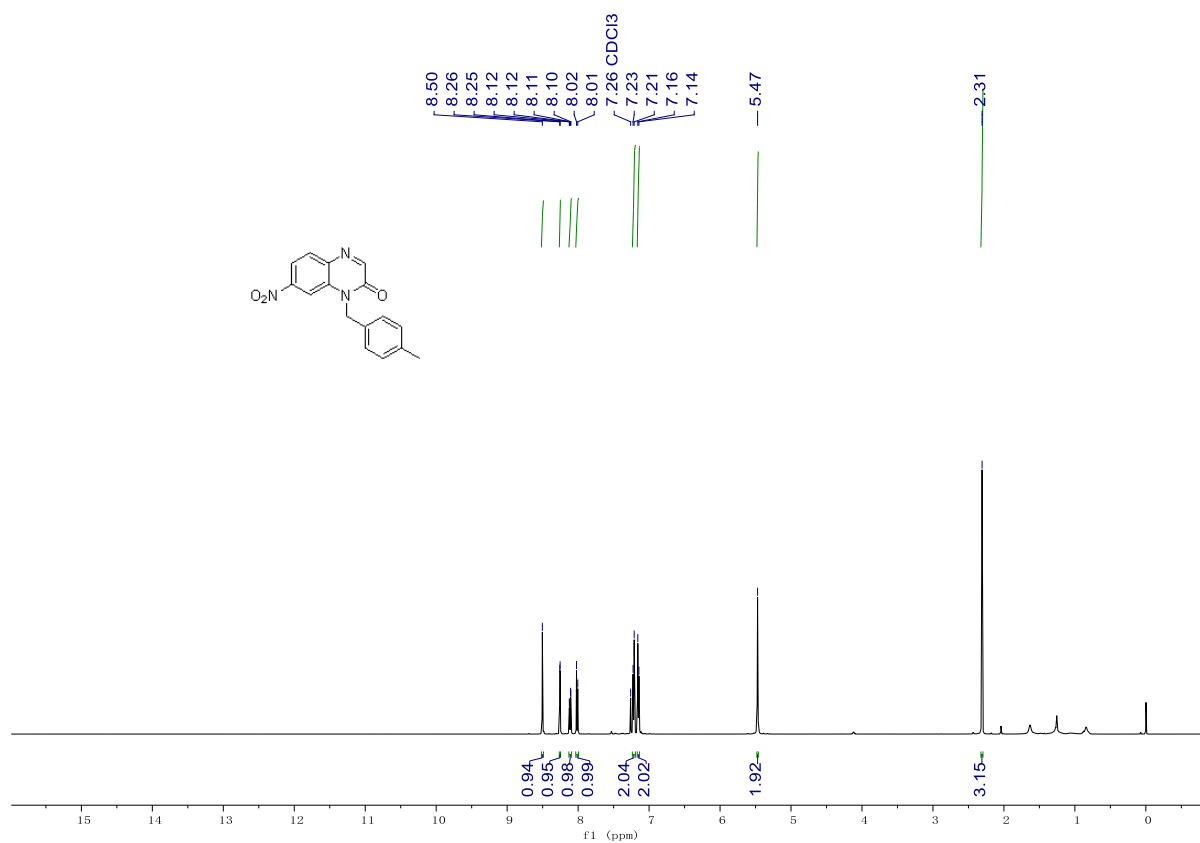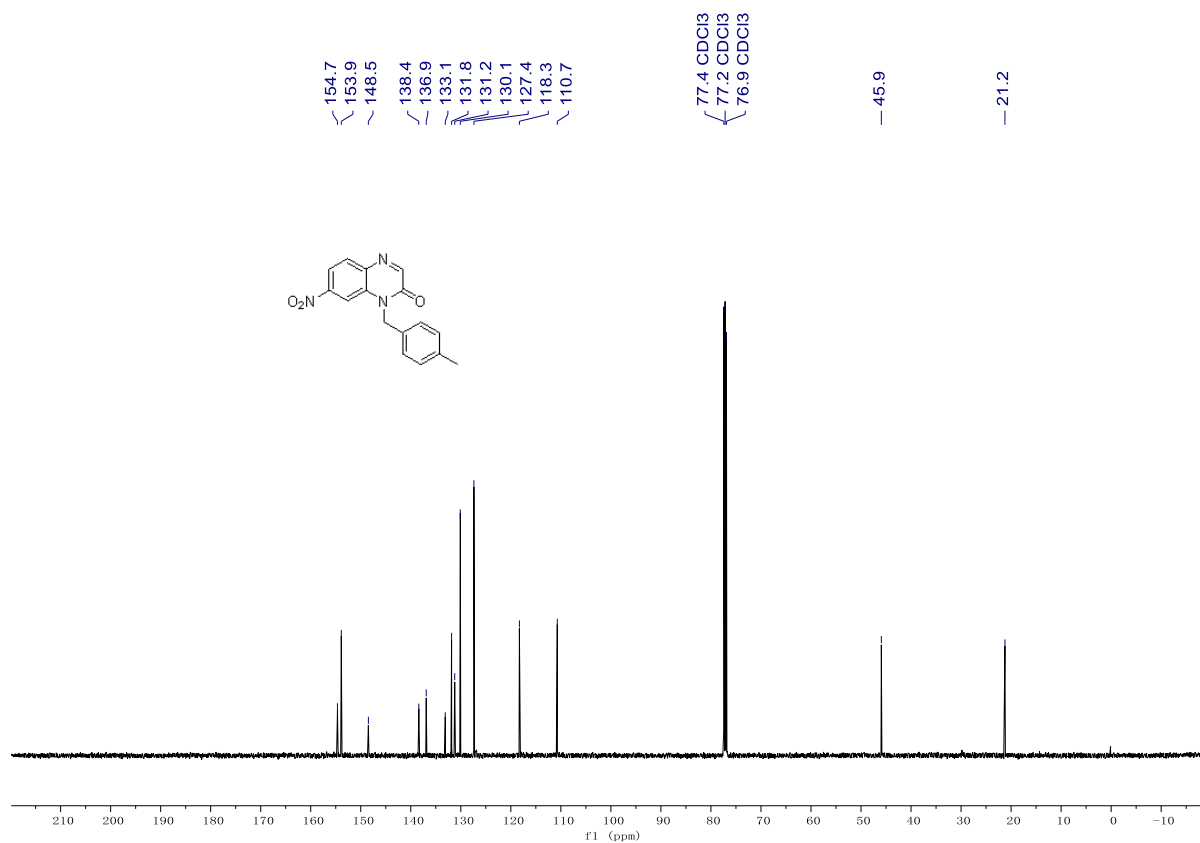

1-(4-methoxybenzyl)-7-nitroquinoxalin-2(1H)-one (2j)

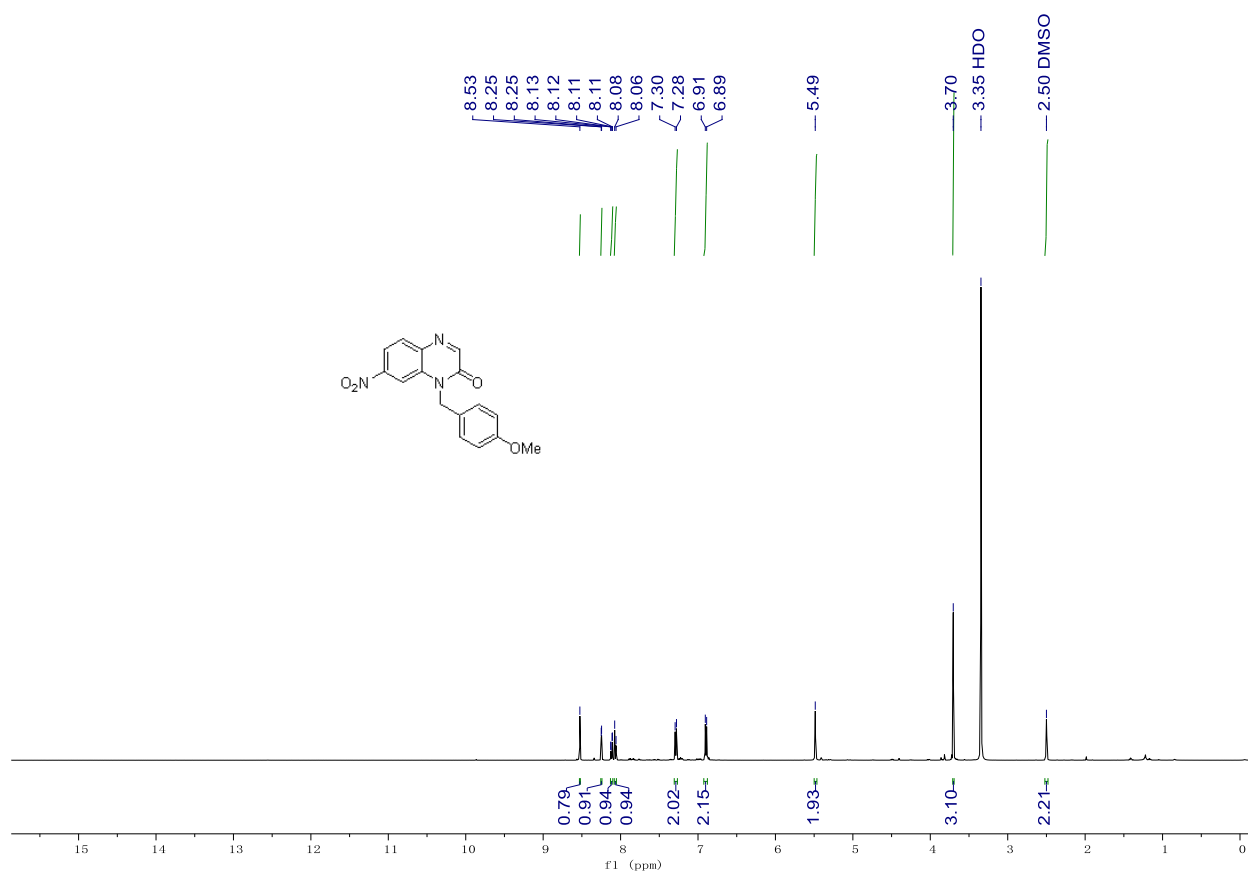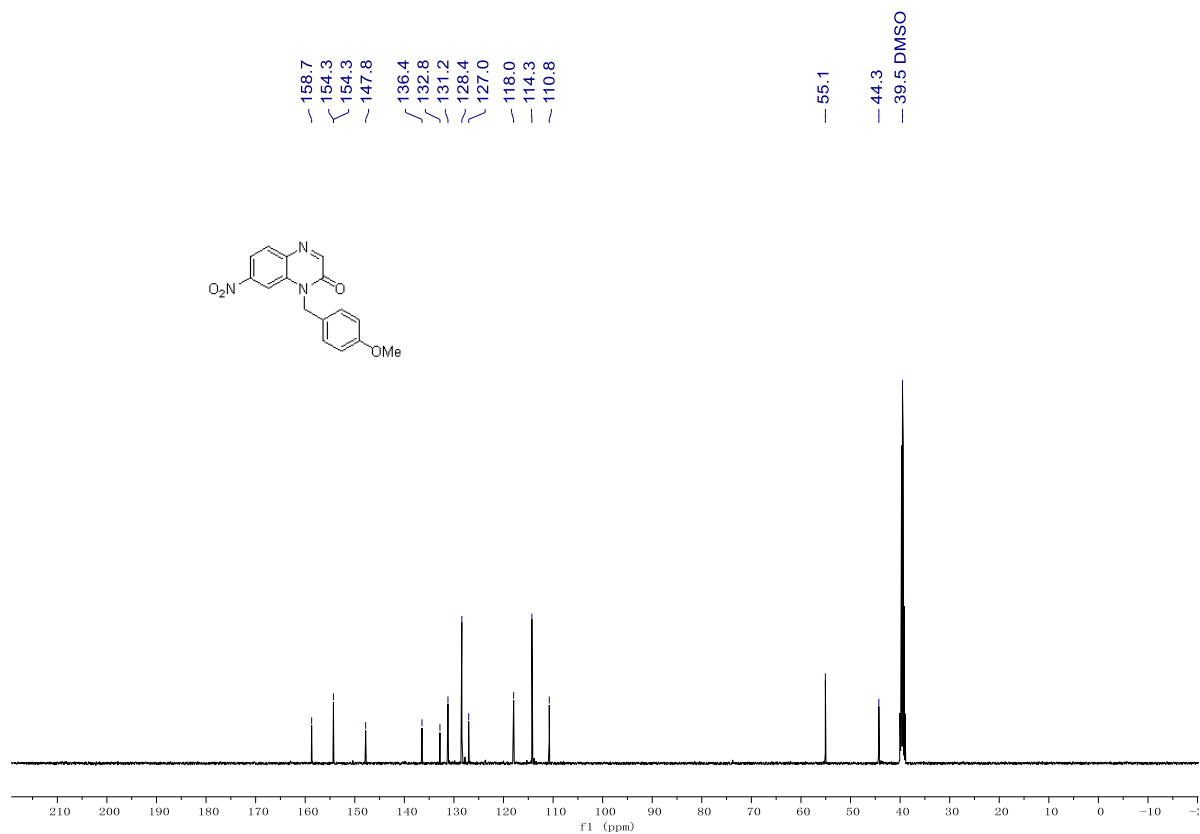

1-(4-chlorobenzyl)-7-nitroquinoxalin-2(1H)-one (2k)

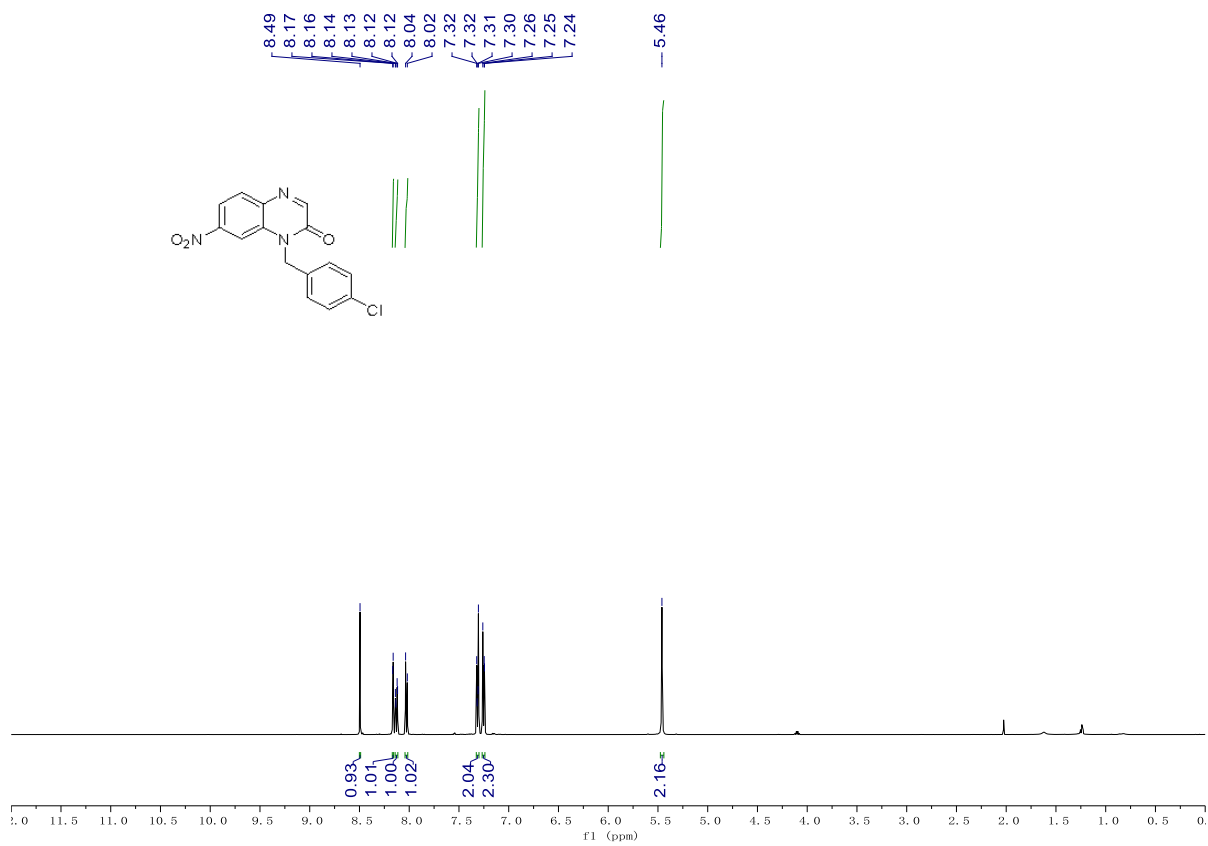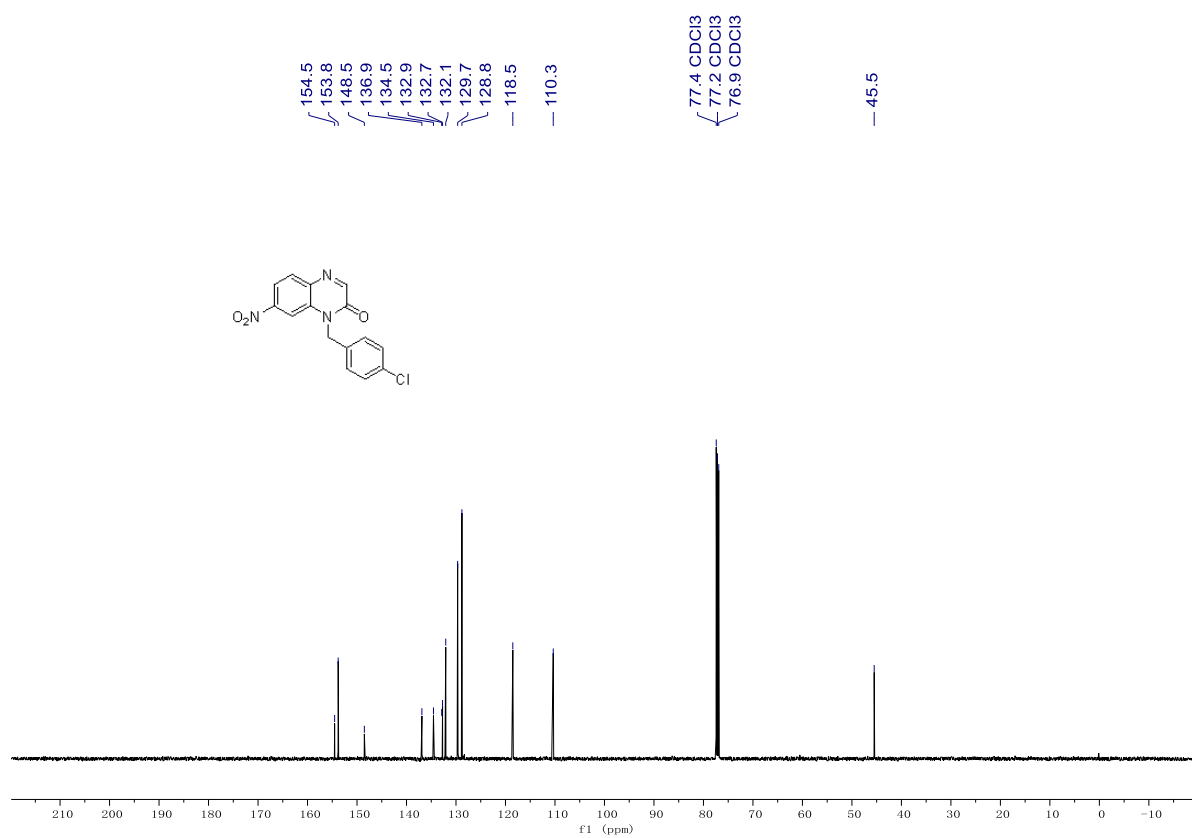



1-(4-bromobenzyl)-7-nitroquinoxalin-2(1H)-one (2l)

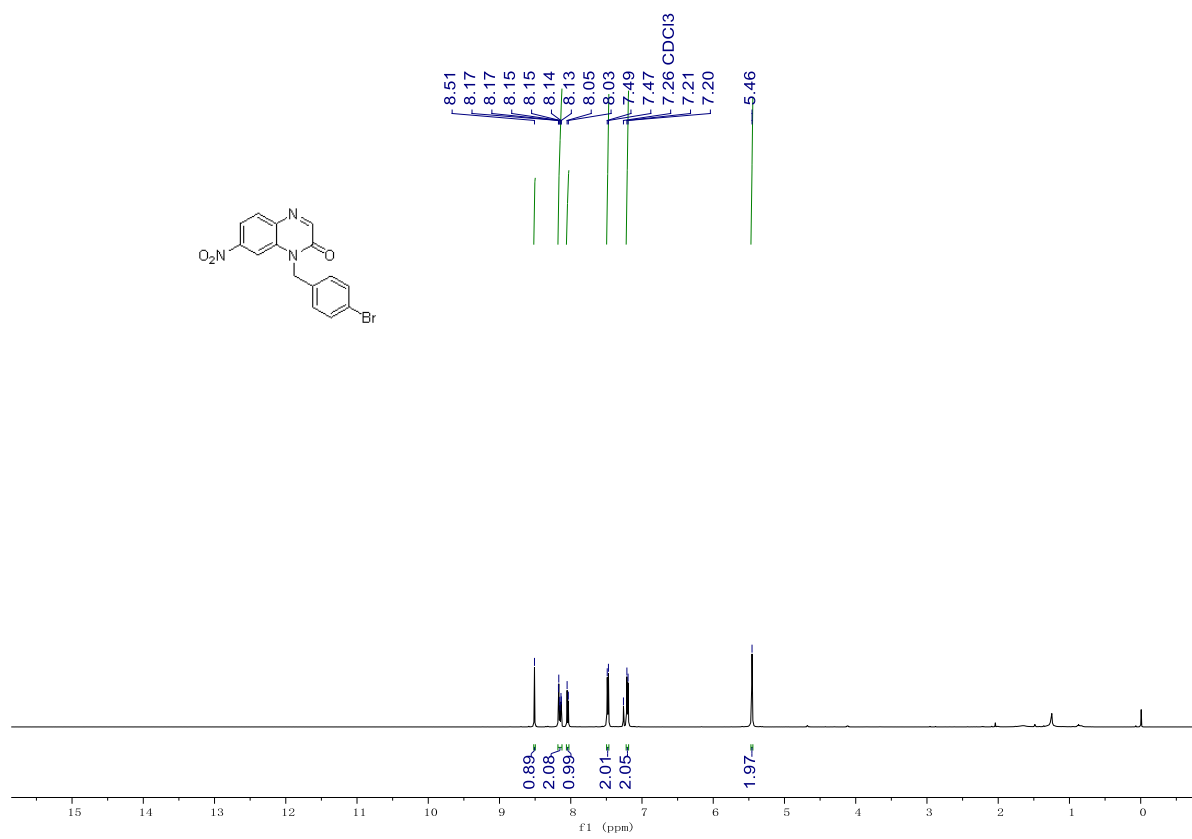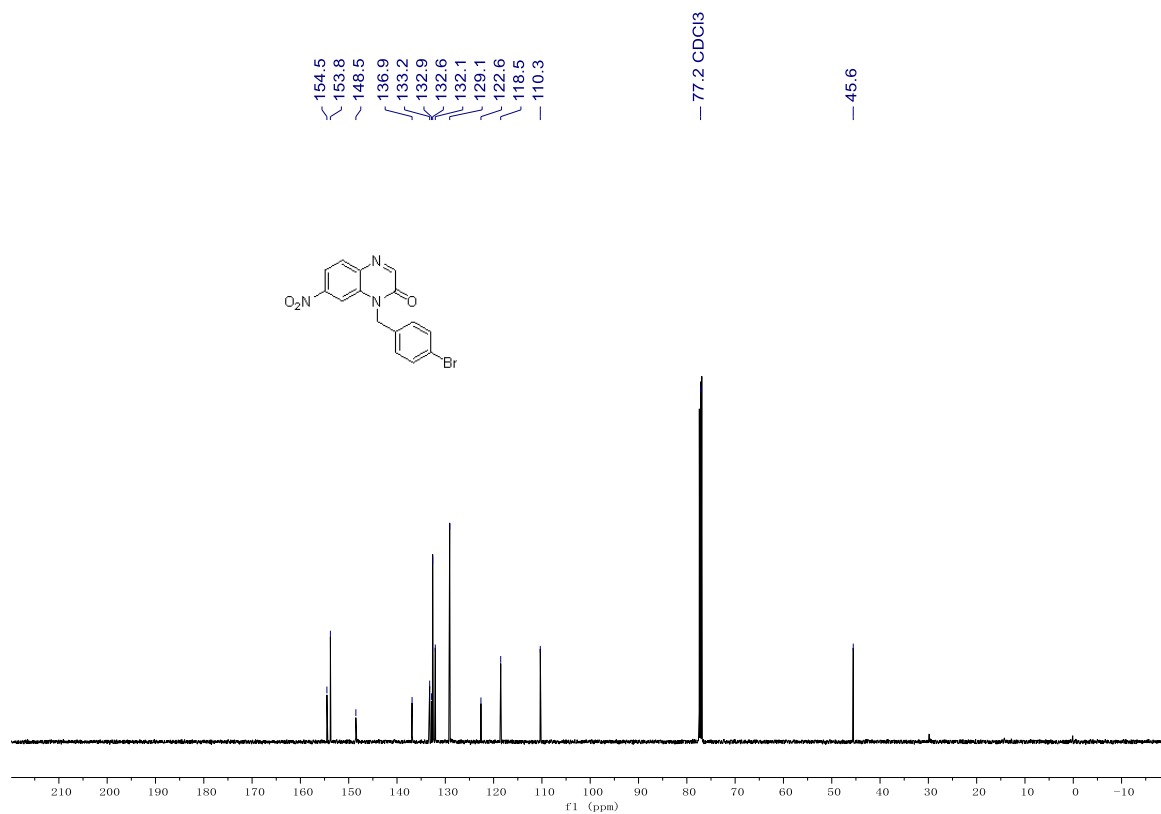

7-nitro-1-(4-(trifluoromethyl)benzyl)quinoxalin-2(1H)-one (2m)

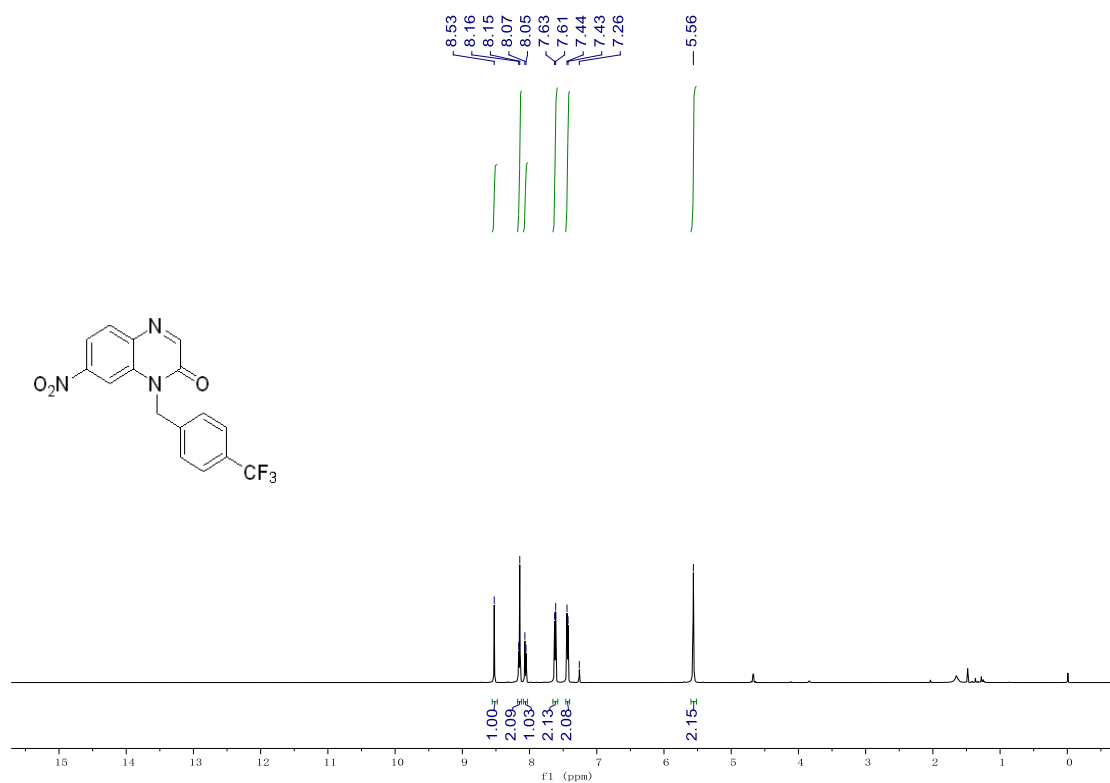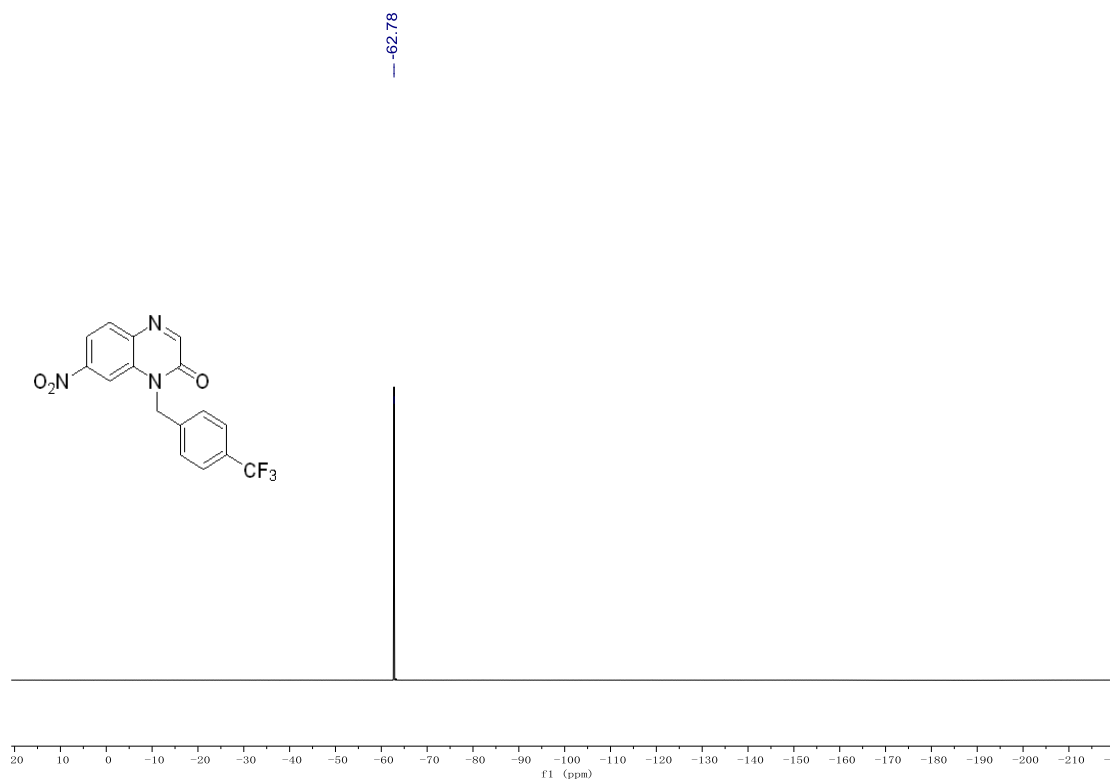

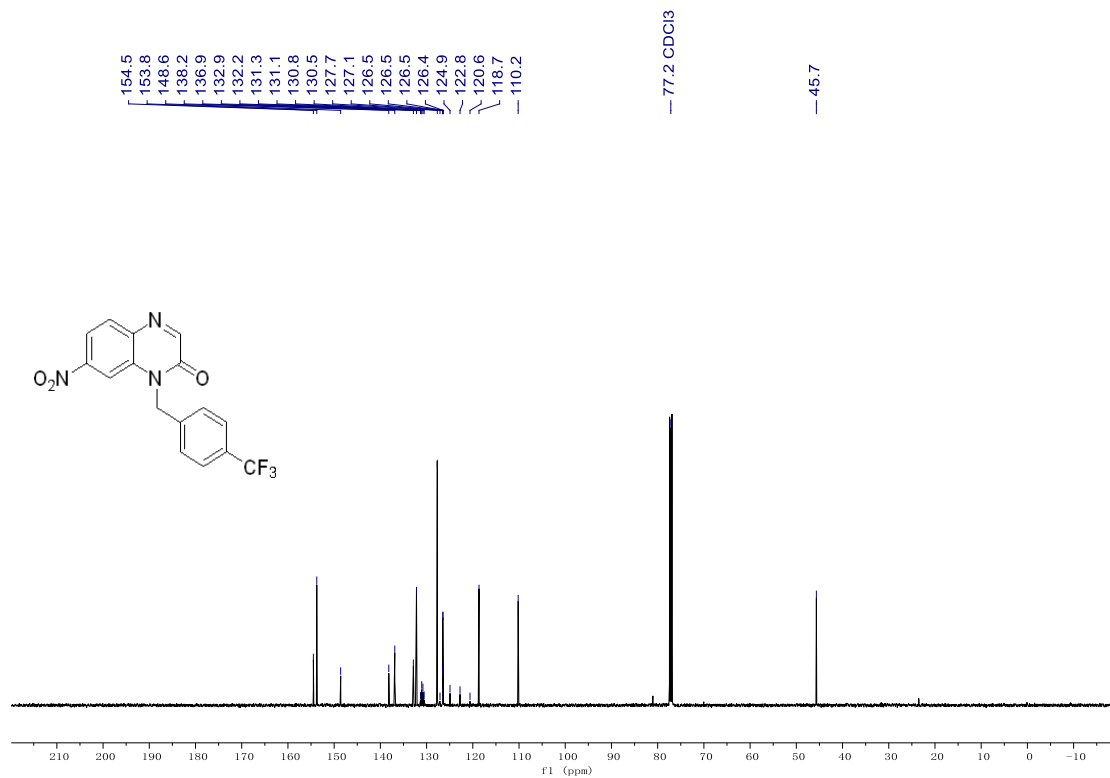

**methyl 4-((7-nitro-2-oxoquinoxalin-1(2H)-yl)methyl)benzoate (2n)**

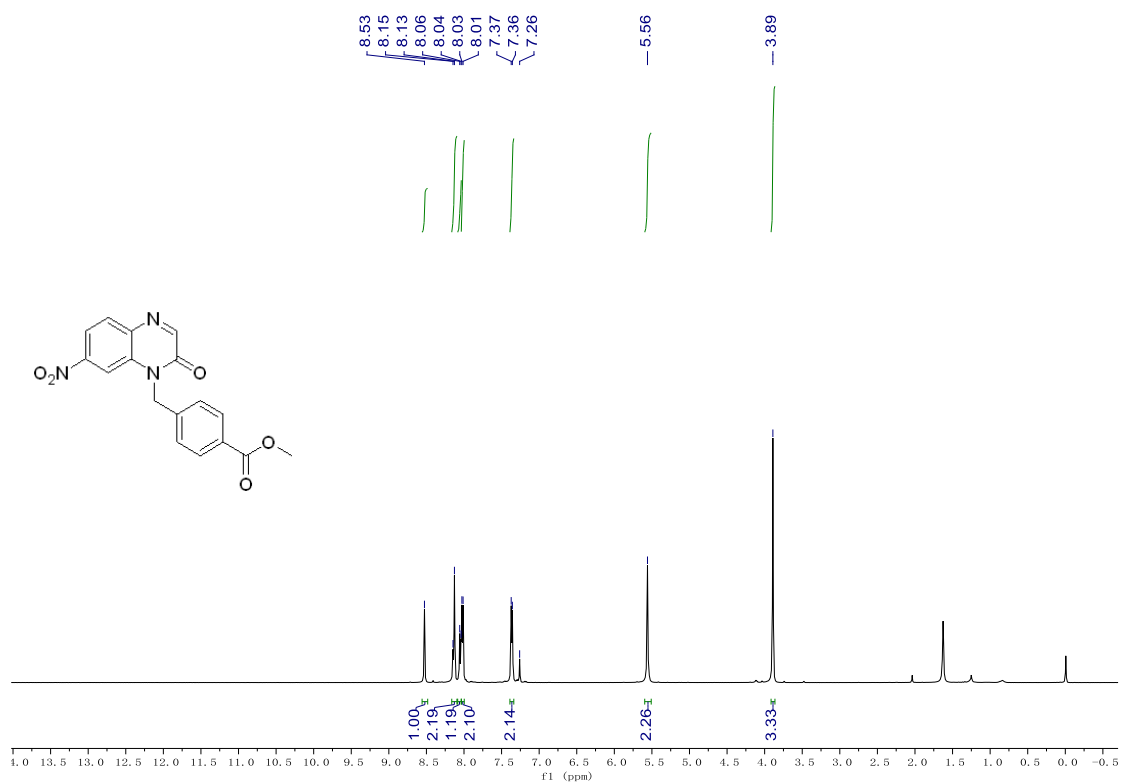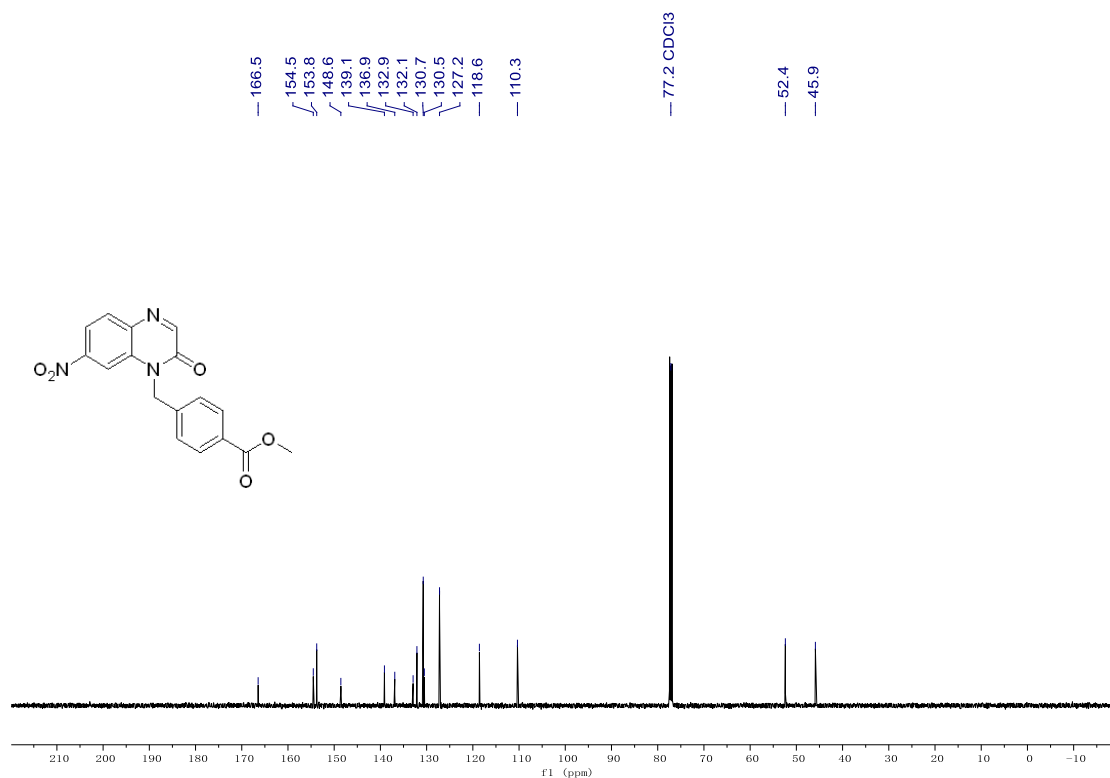

4-((7-nitro-2-oxoquinoxalin-1(2H)-yl)methyl)benzonitrile (2o)

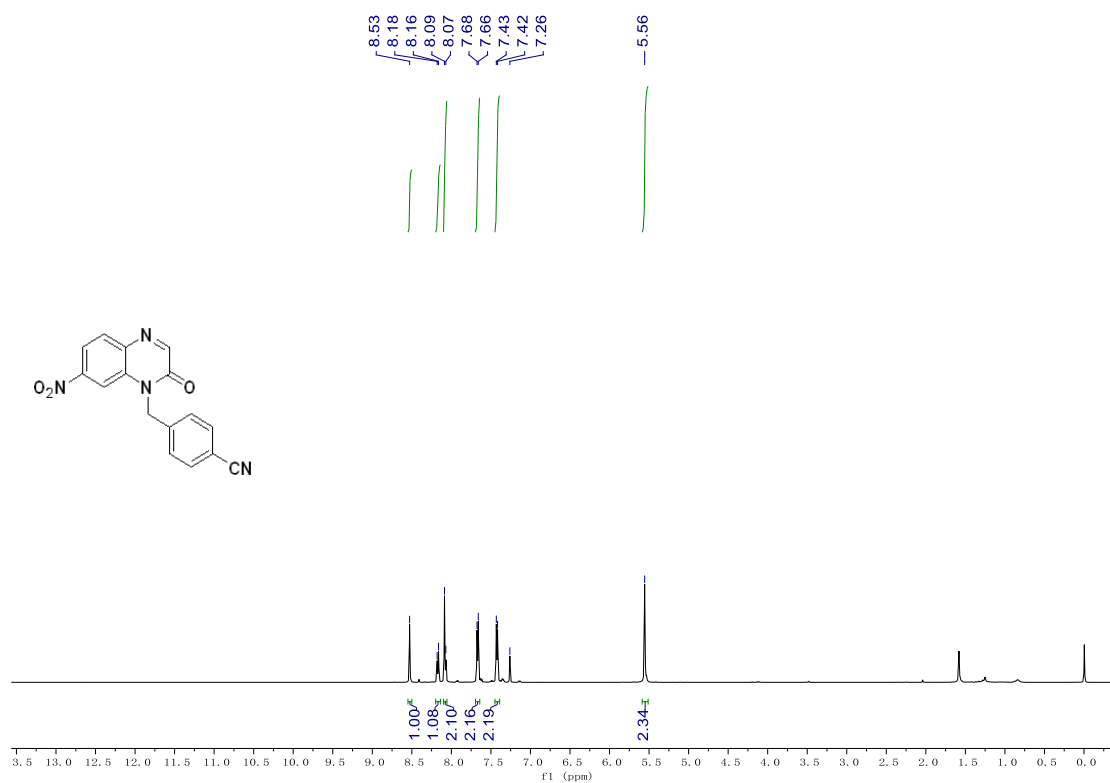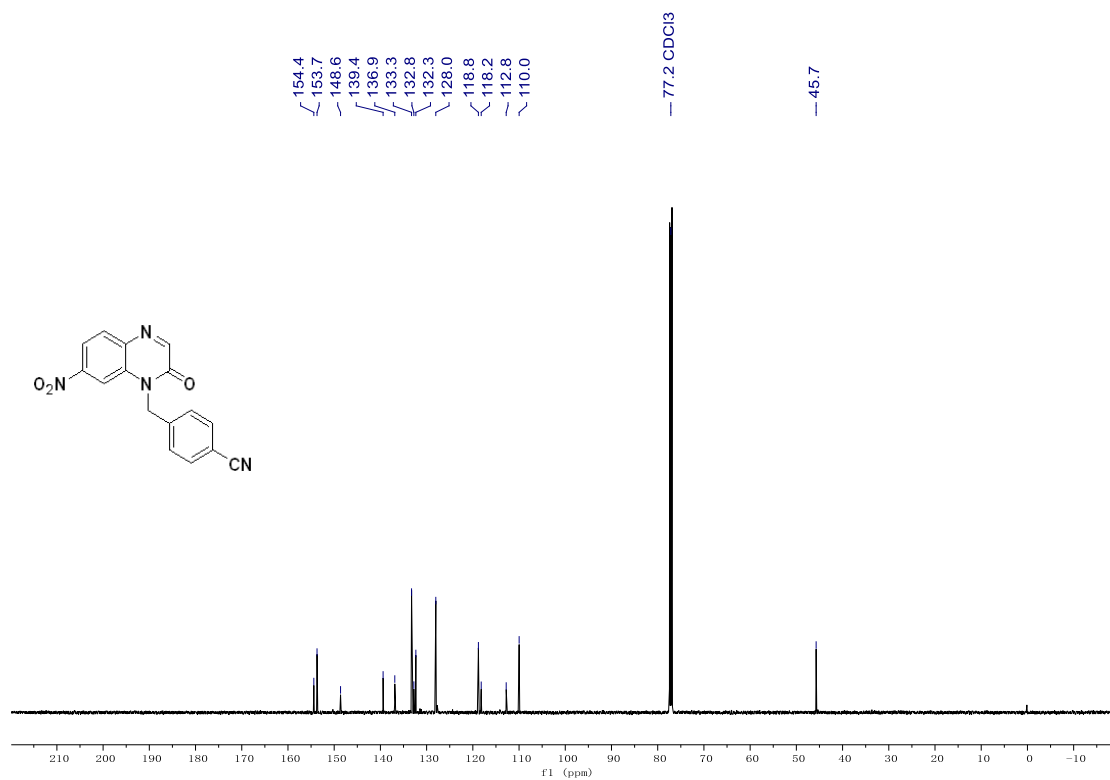

7-nitro-1-(4-nitrobenzyl)quinoxalin-2(1H)-one (2p)

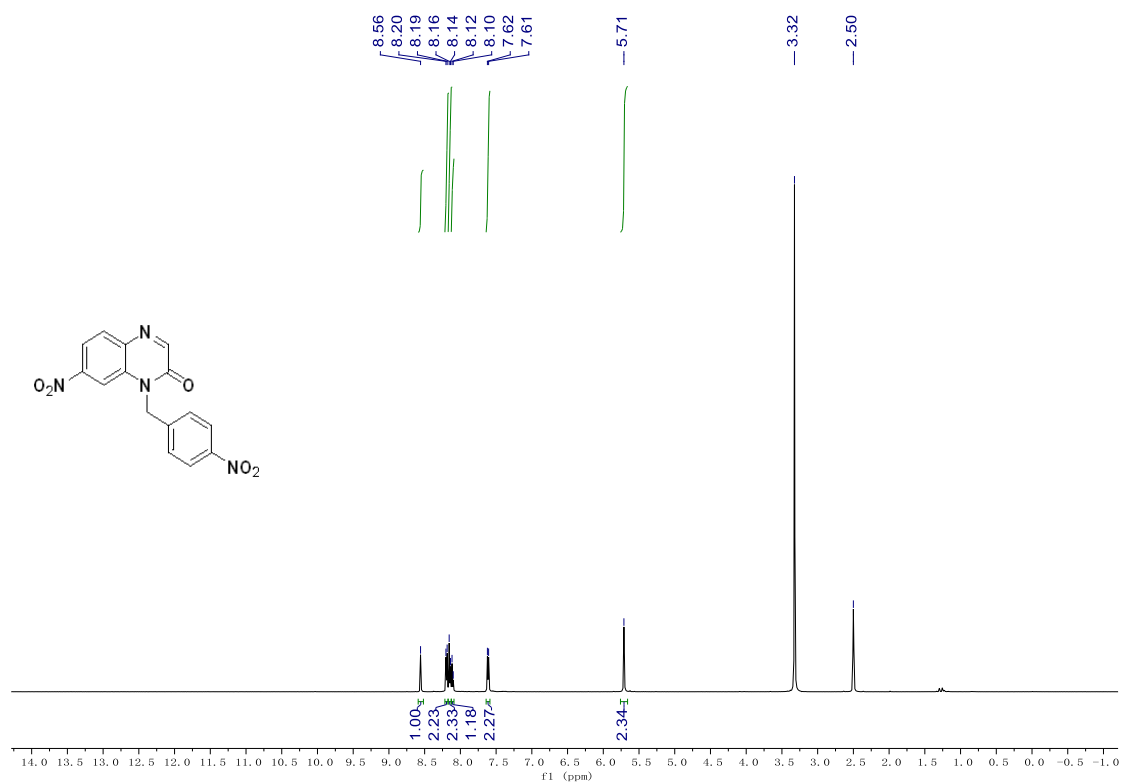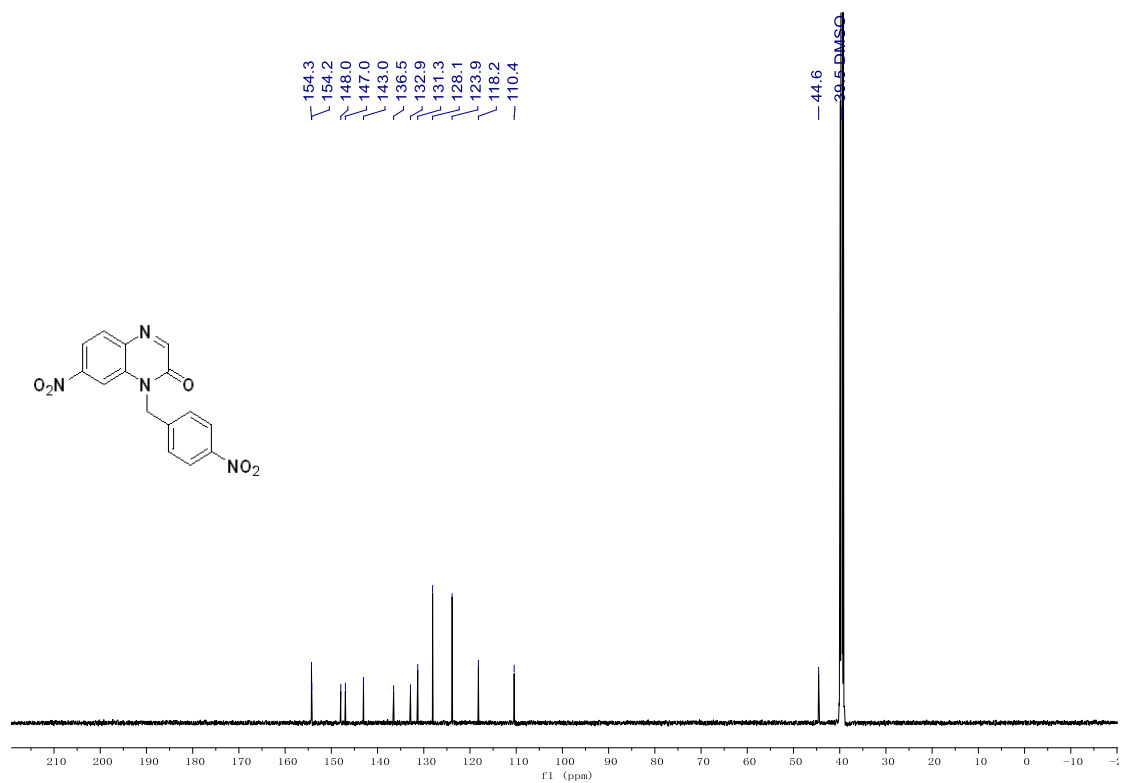

# 7-nitro-1-phenylquinoxalin-2(1H)-one (2q)

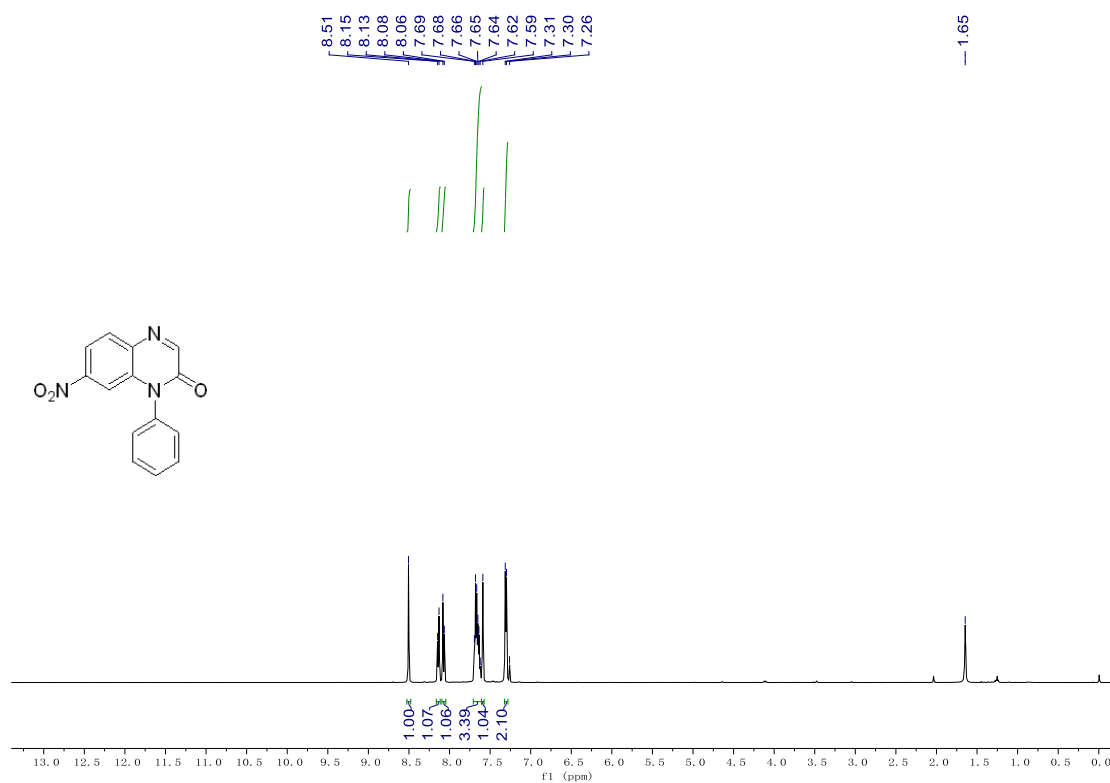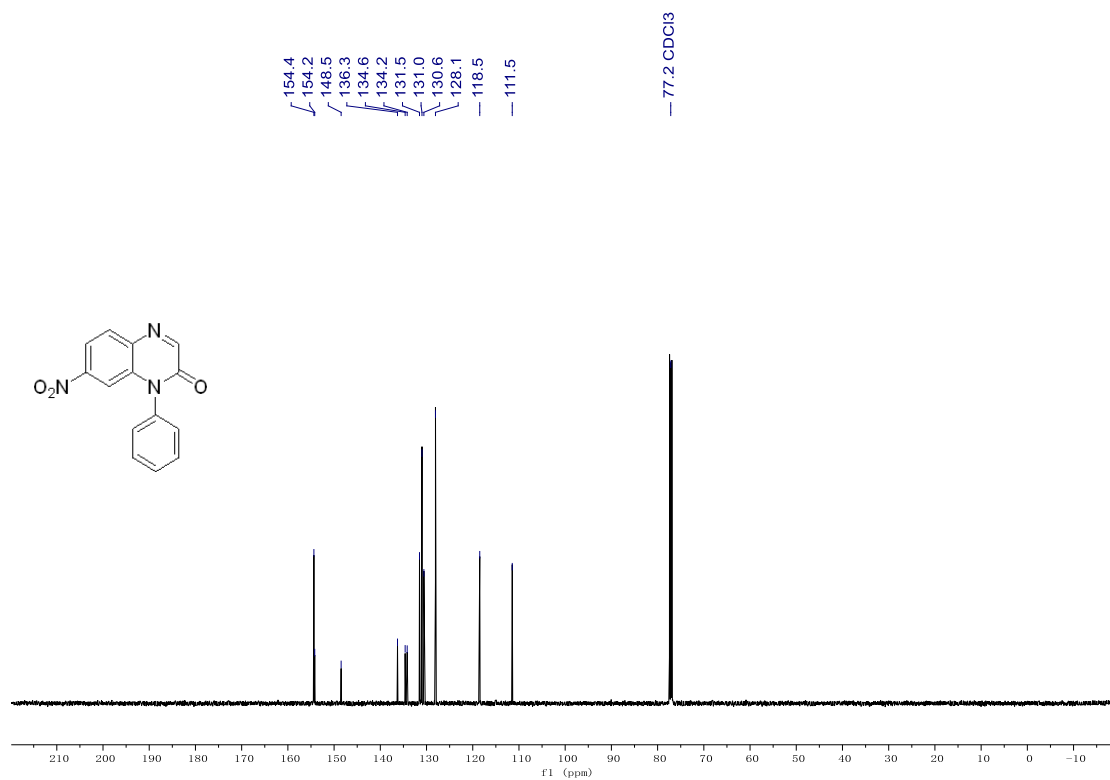

### 5-methyl-7-nitroquinoxalin-2(1H)-one (2r)

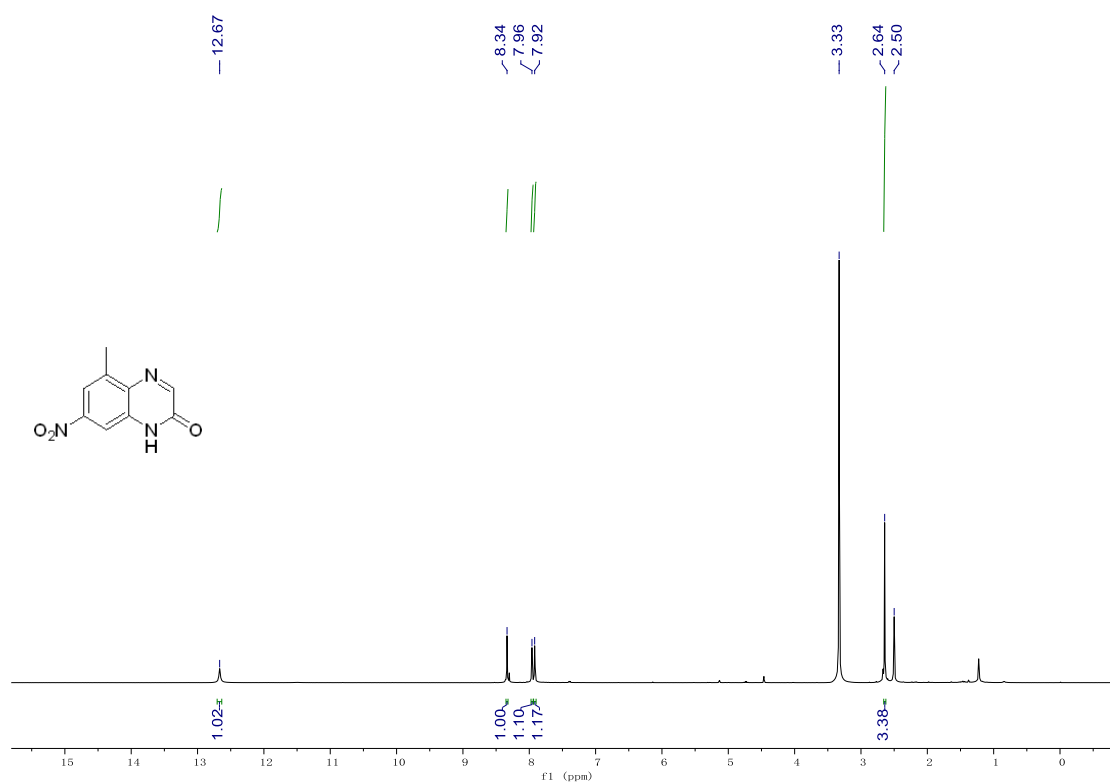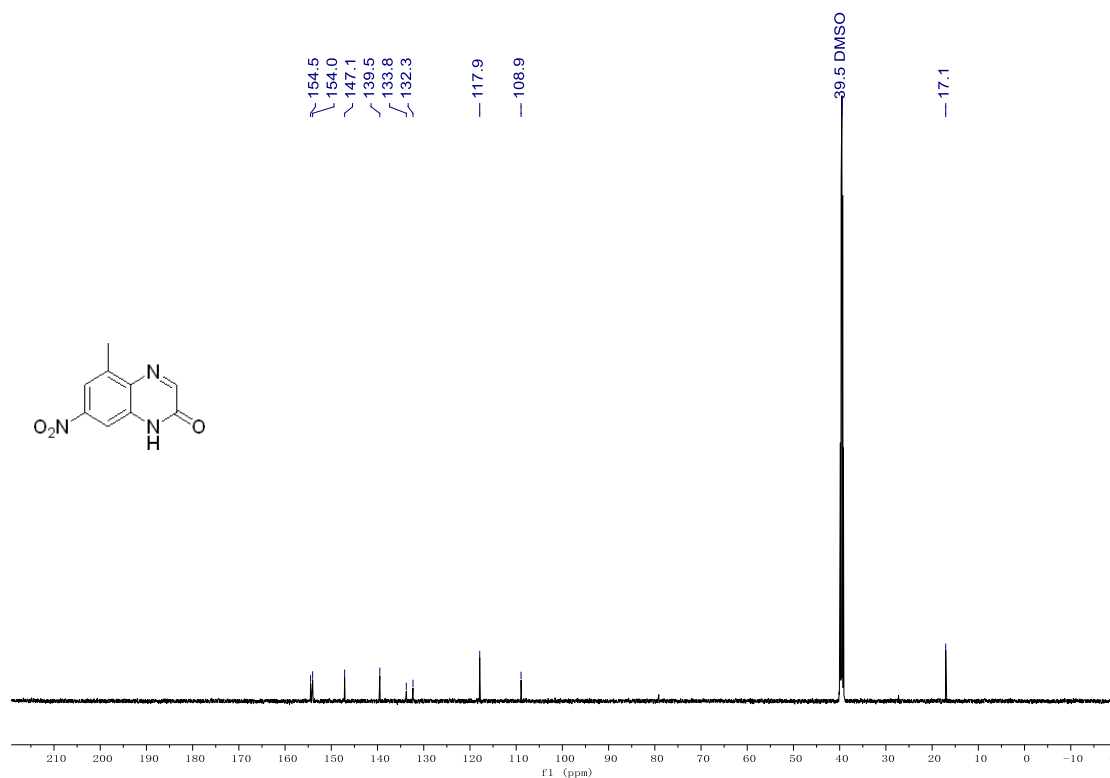



6-chloro-7-nitroquinoxalin-2(1H)-one (2s)

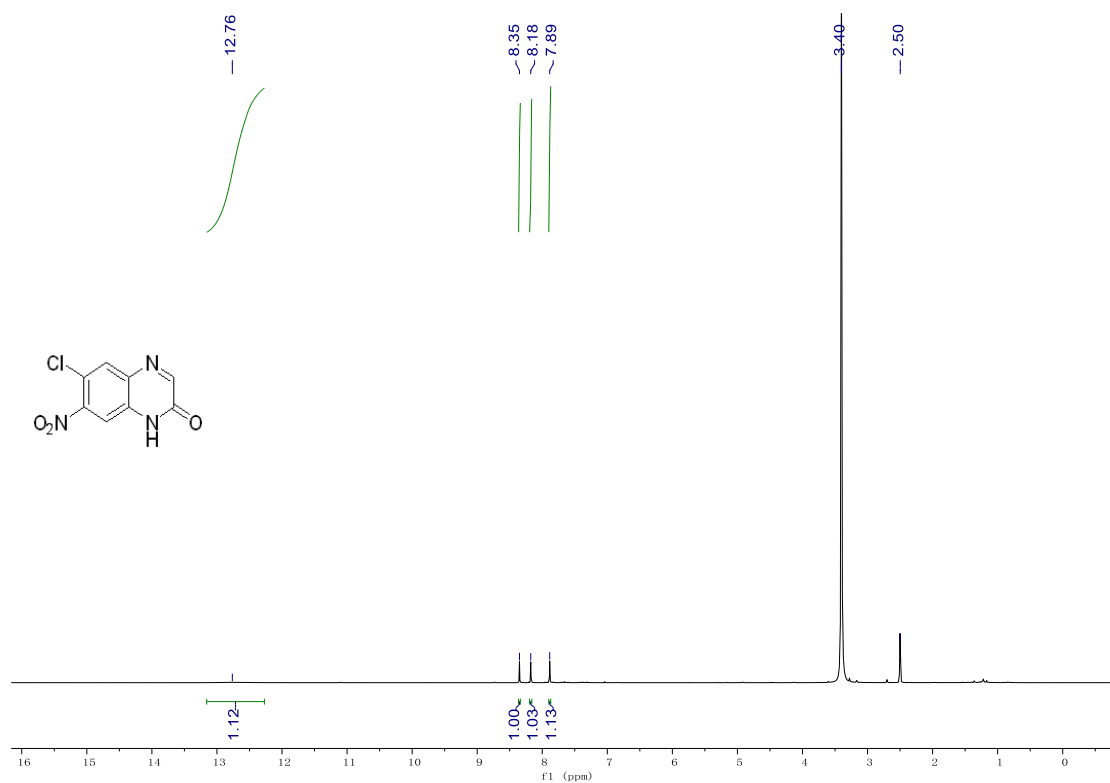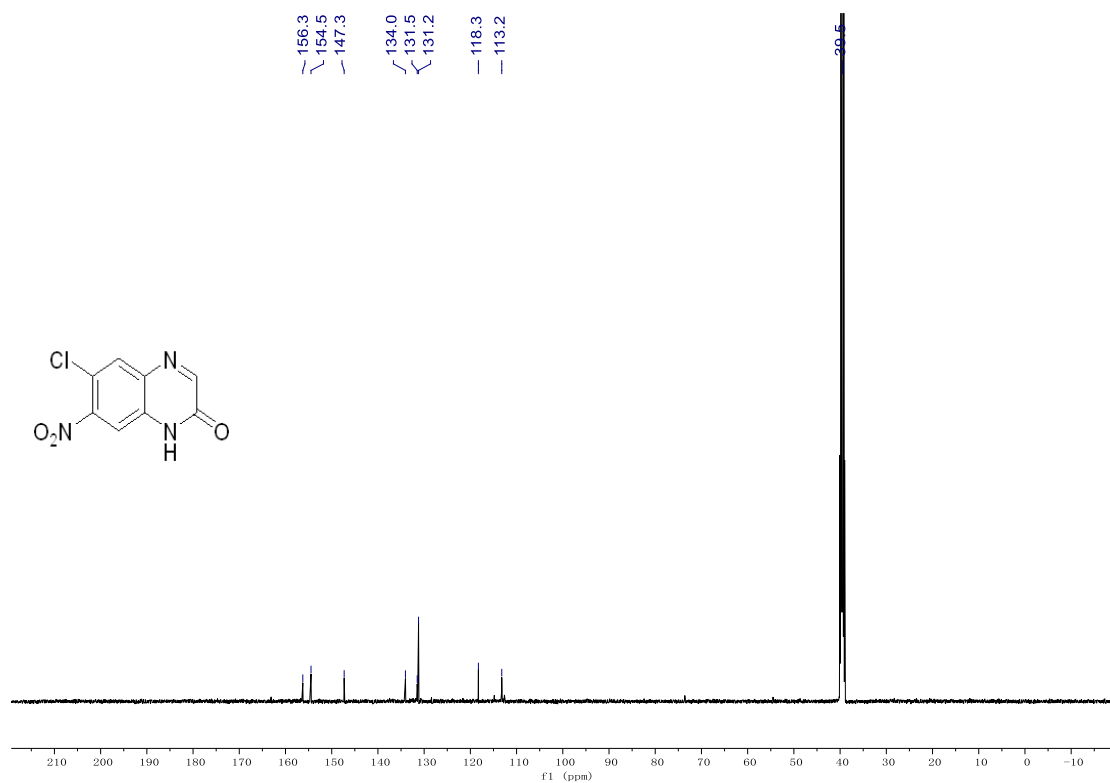

### 7-methyl-5-nitroquinoxalin-2(1H)-one (2u)

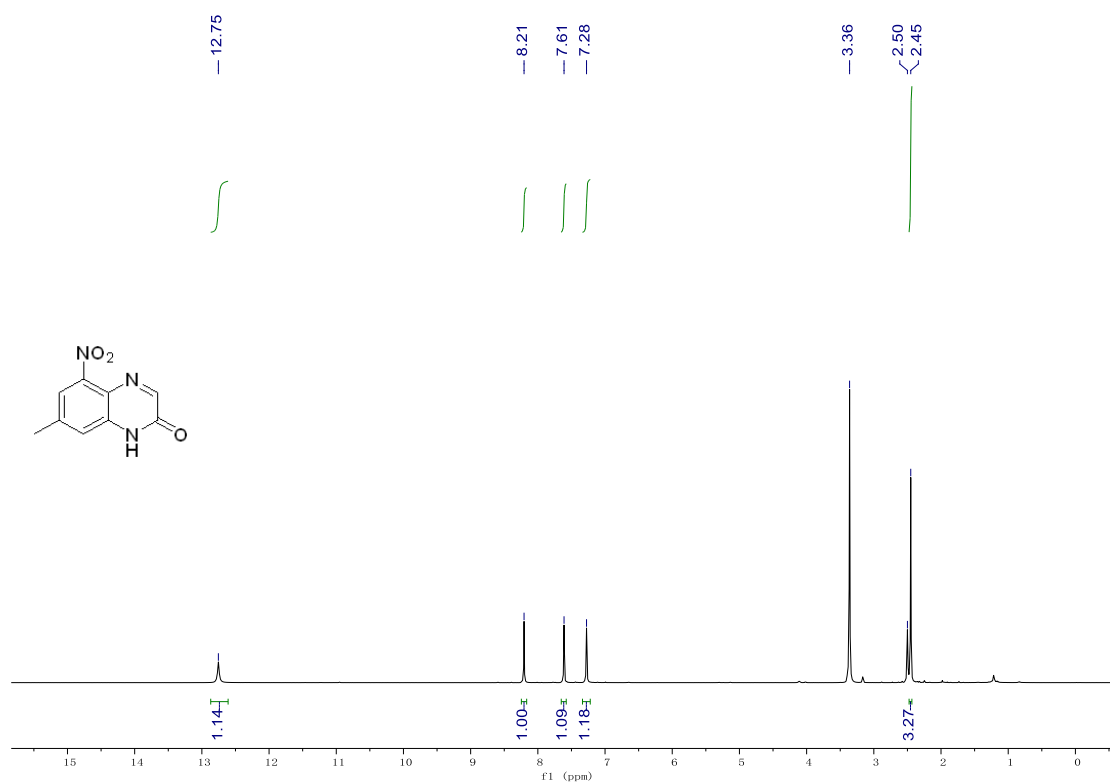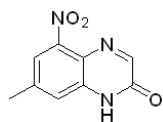

154.7  
153.1  
147.4  
141.8  
133.0  
121.5  
118.6  
117.8

39.5 DMSO  
21.1

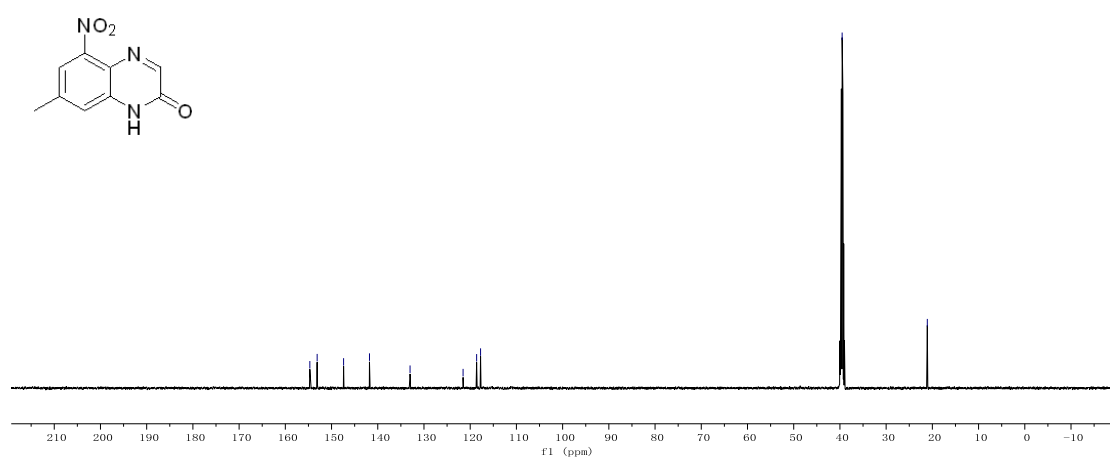

6,7-dimethyl-5-nitroquinoxalin-2(1H)-one (2v)

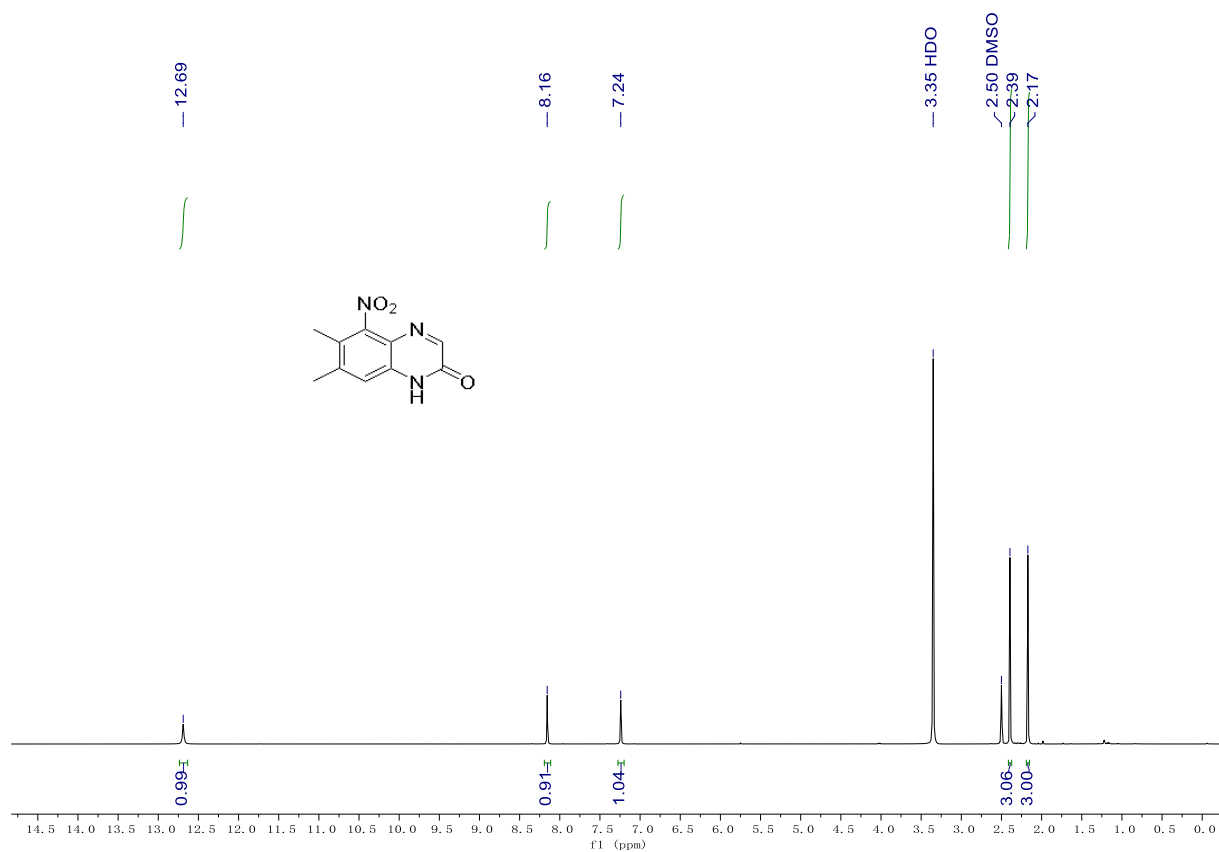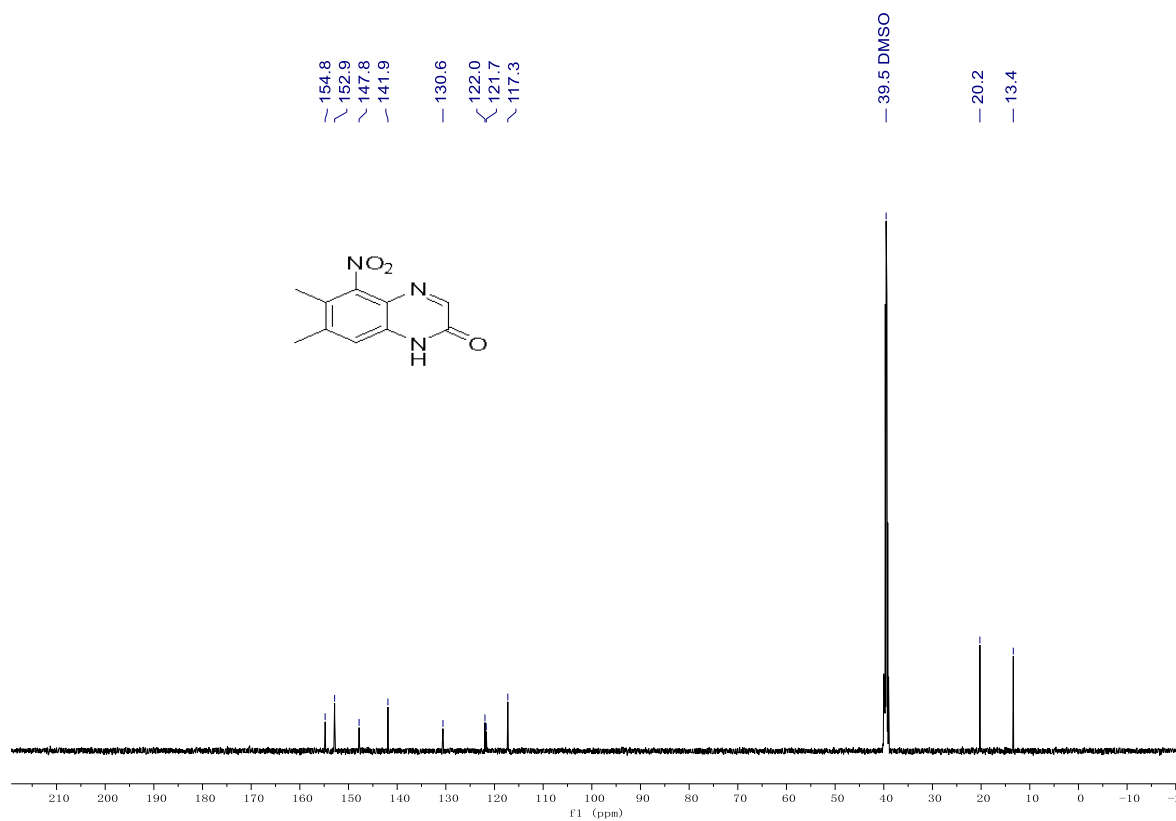

ethyl 2-(6,7-dimethyl-5-nitro-2-oxoquinoxalin-1(2H)-yl)acetate (2w)

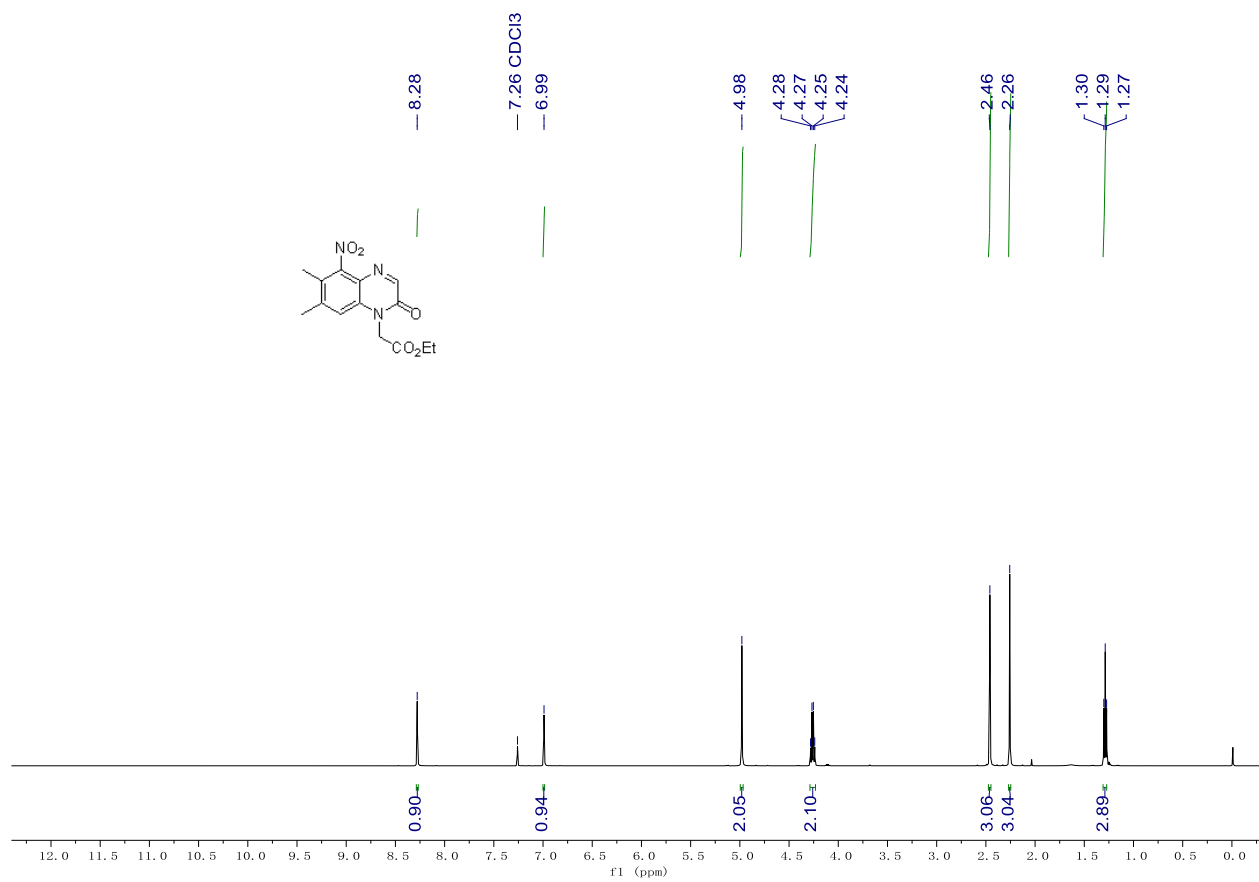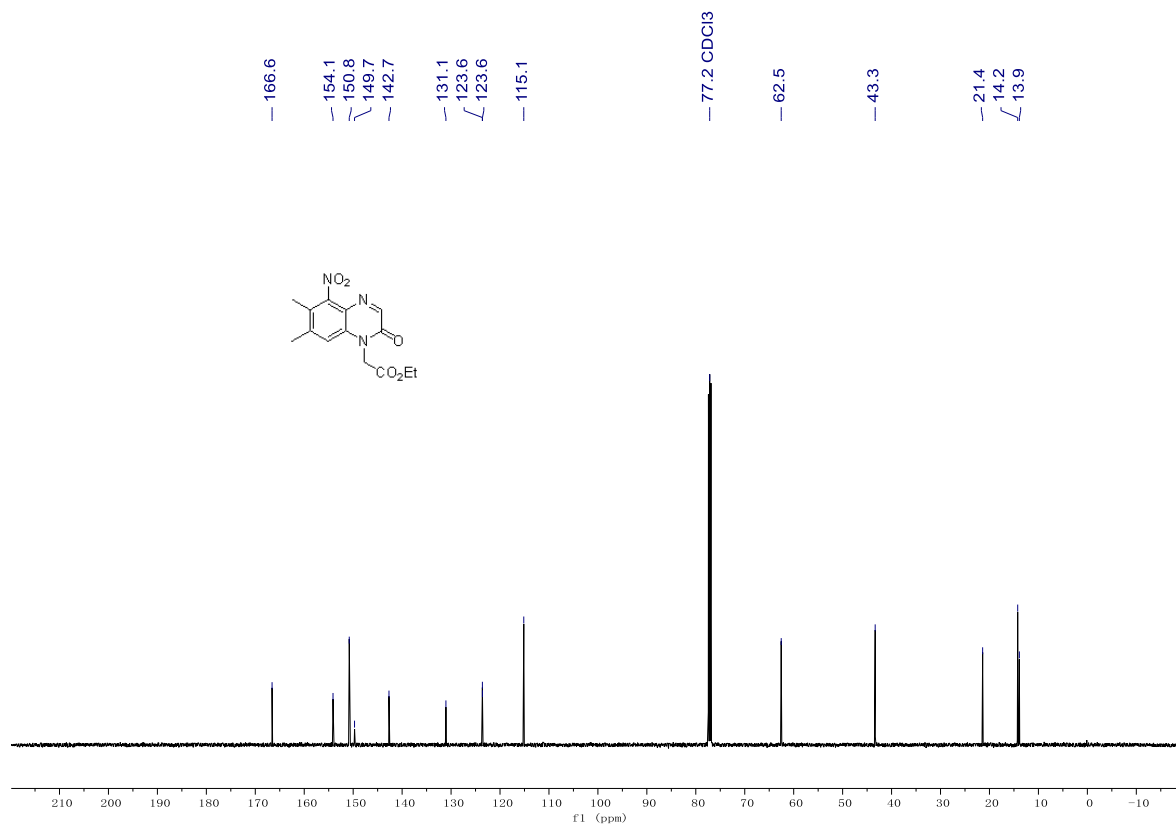

6,7-dimethyl-5-nitro-1-(prop-2-yn-1-yl)quinoxalin-2(1H)-one (2x)

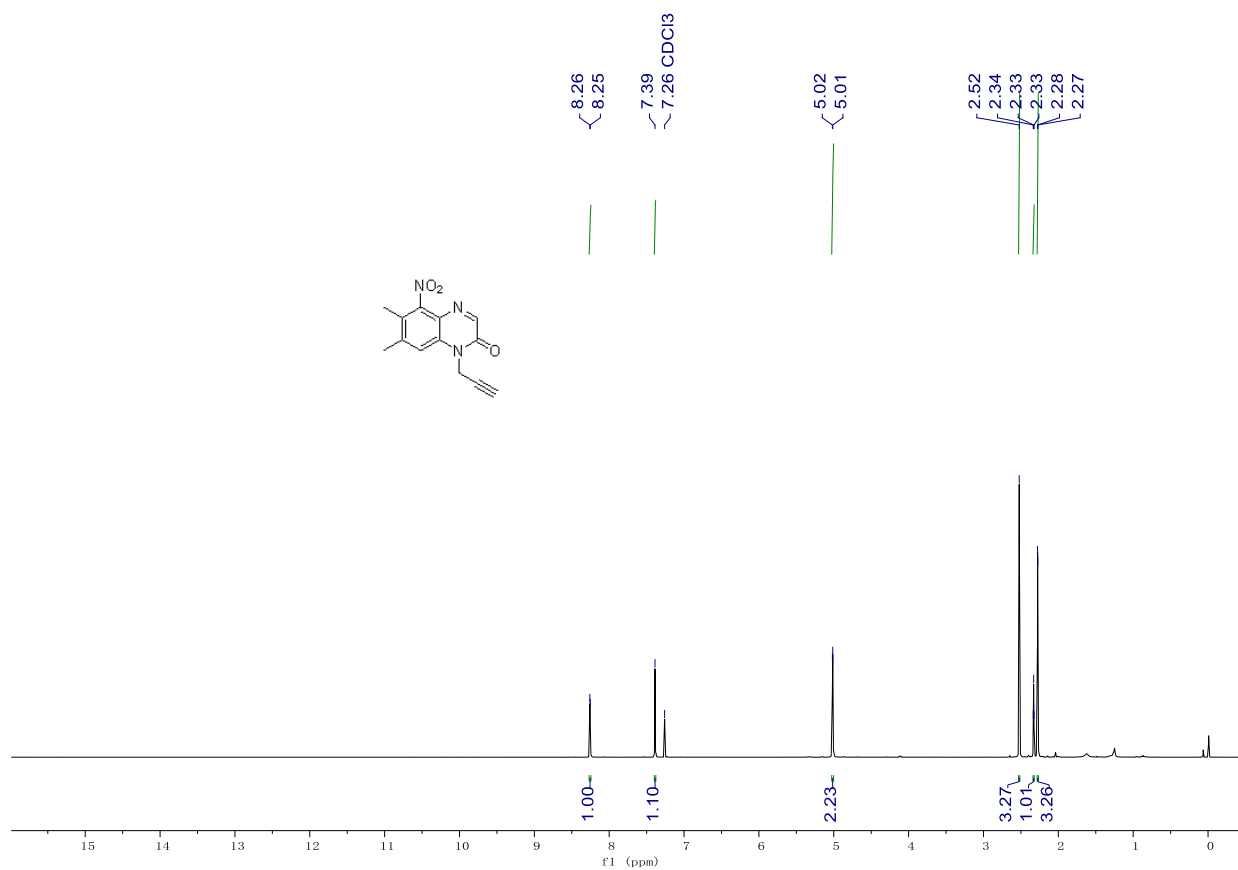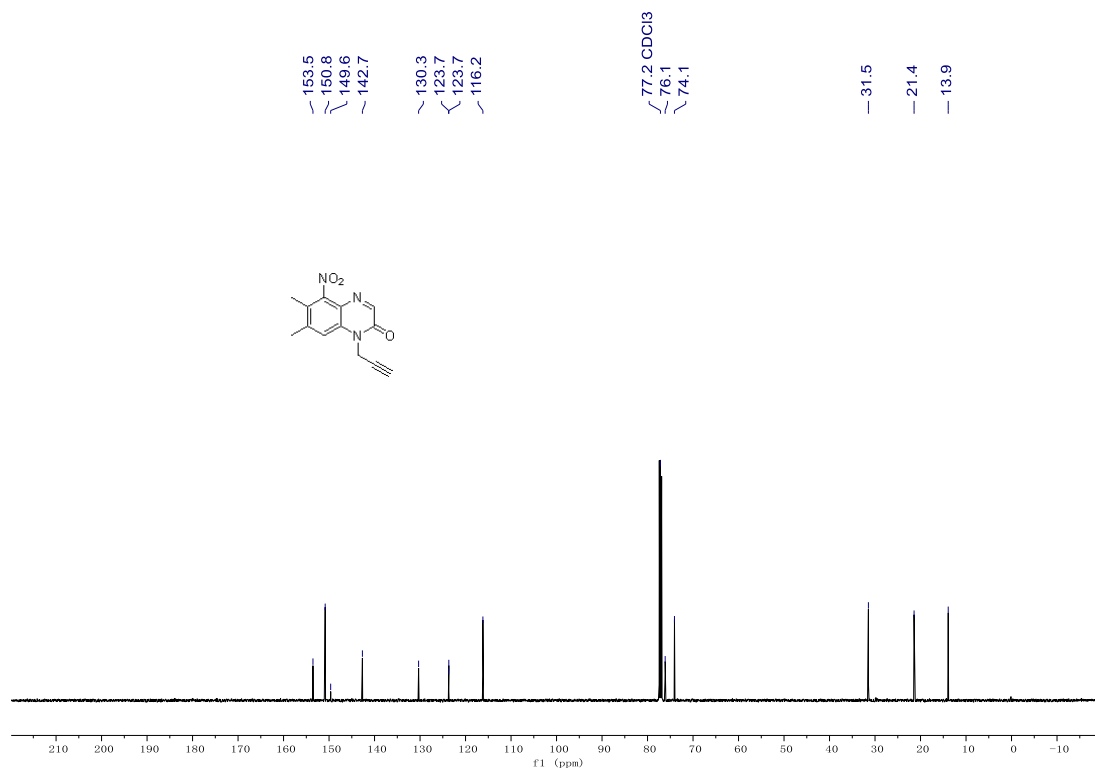

1-allyl-6,7-dimethyl-5-nitroquinoxalin-2(1H)-one (2y)

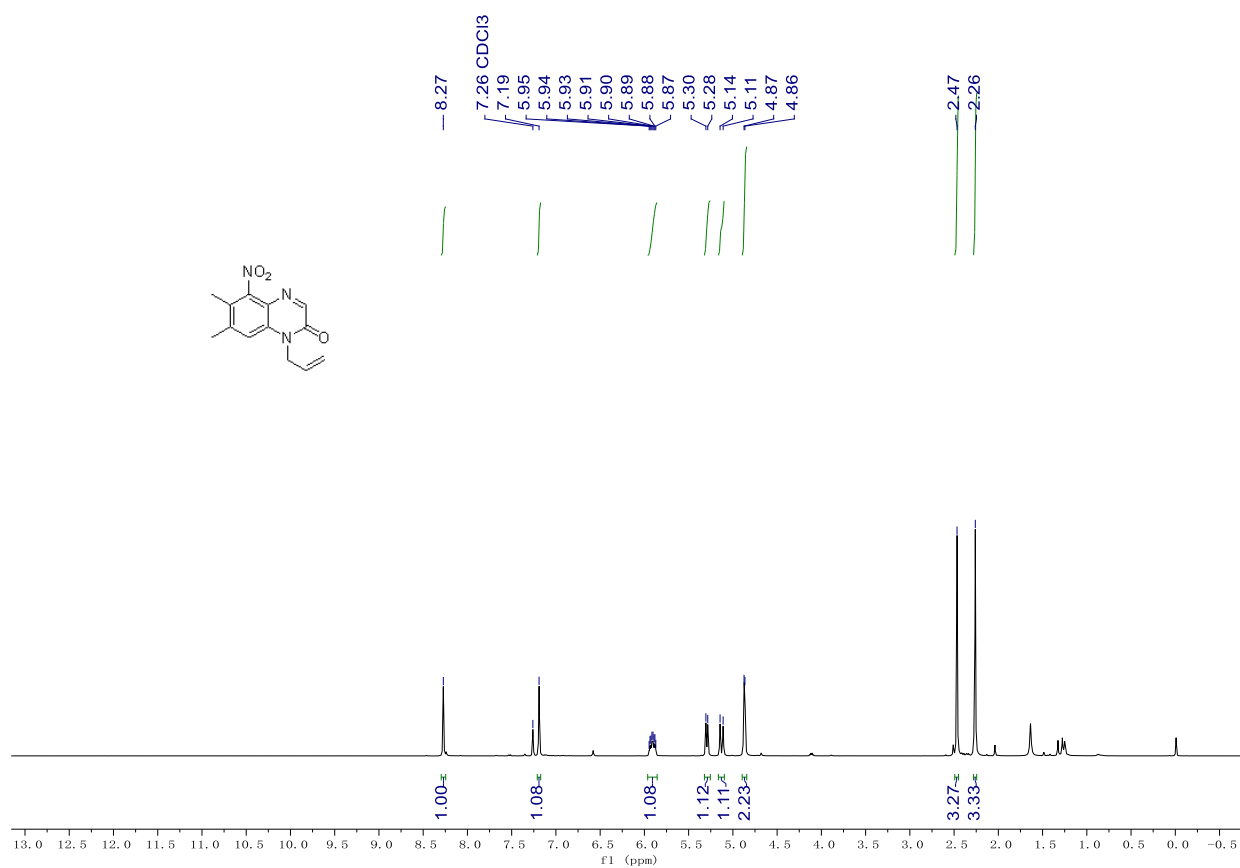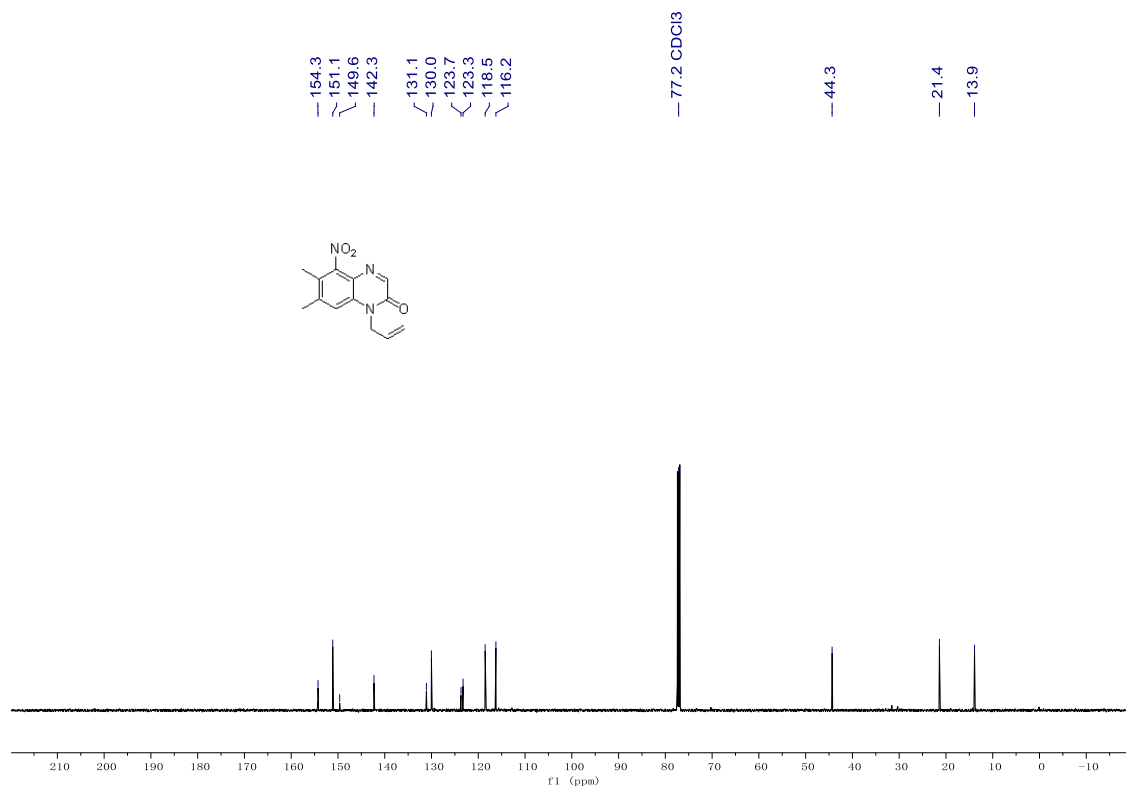

1-benzyl-6,7-dimethyl-5-nitroquinoxalin-2(1H)-one (2z)

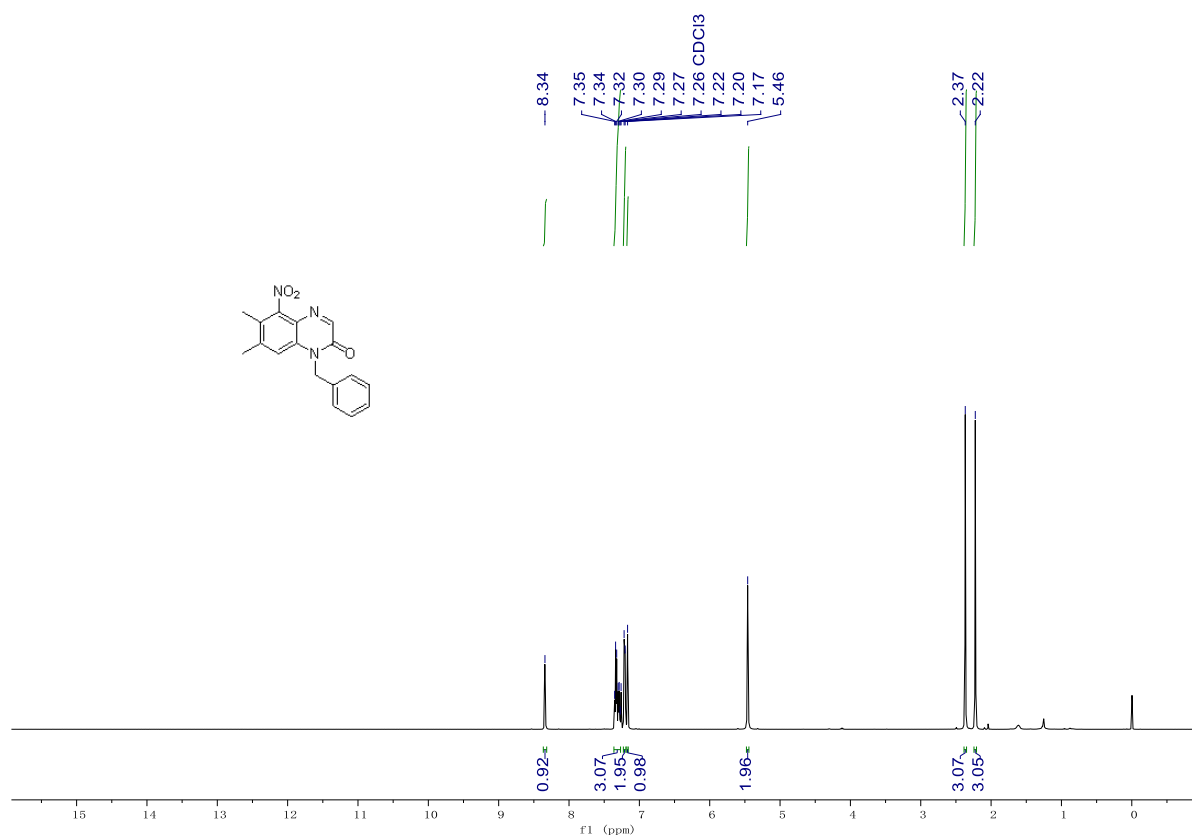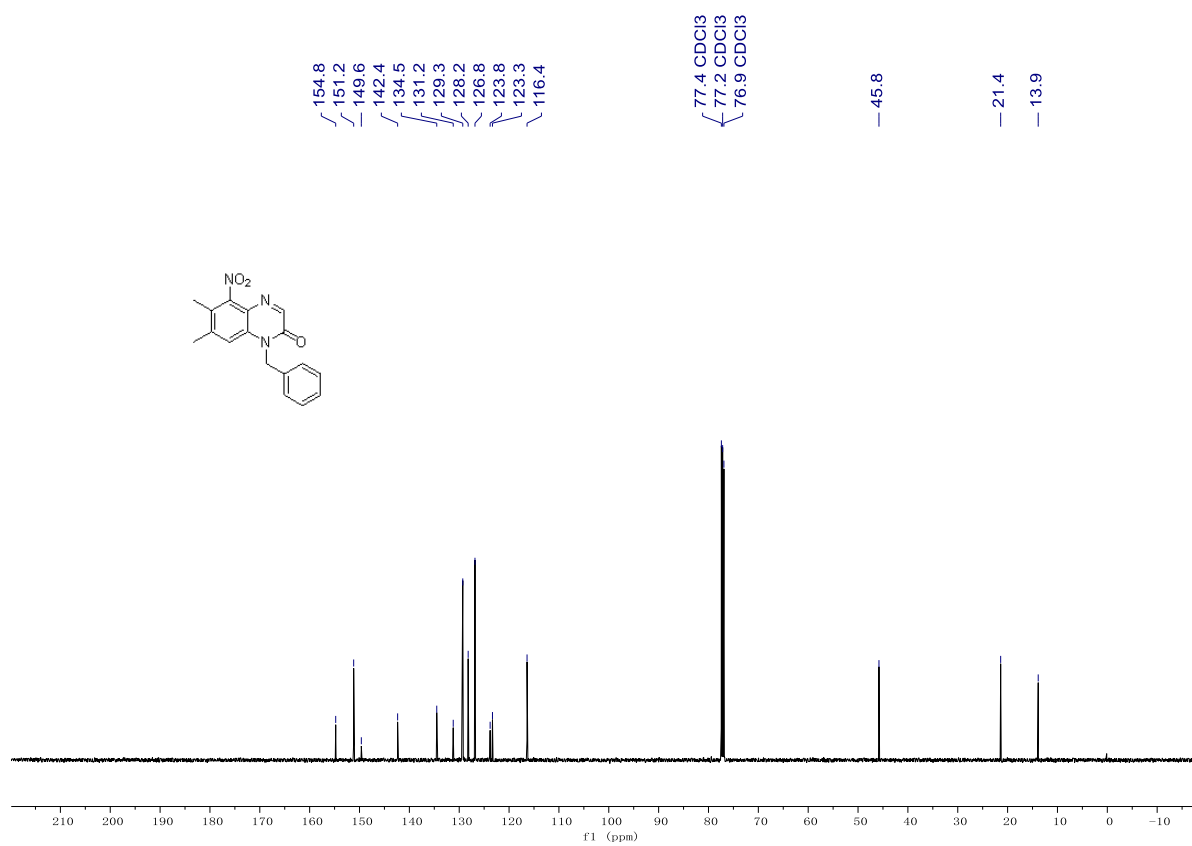

1-(4-bromobenzyl)-6,7-dimethyl-5-nitroquinoxalin-2(1H)-one (2aa)

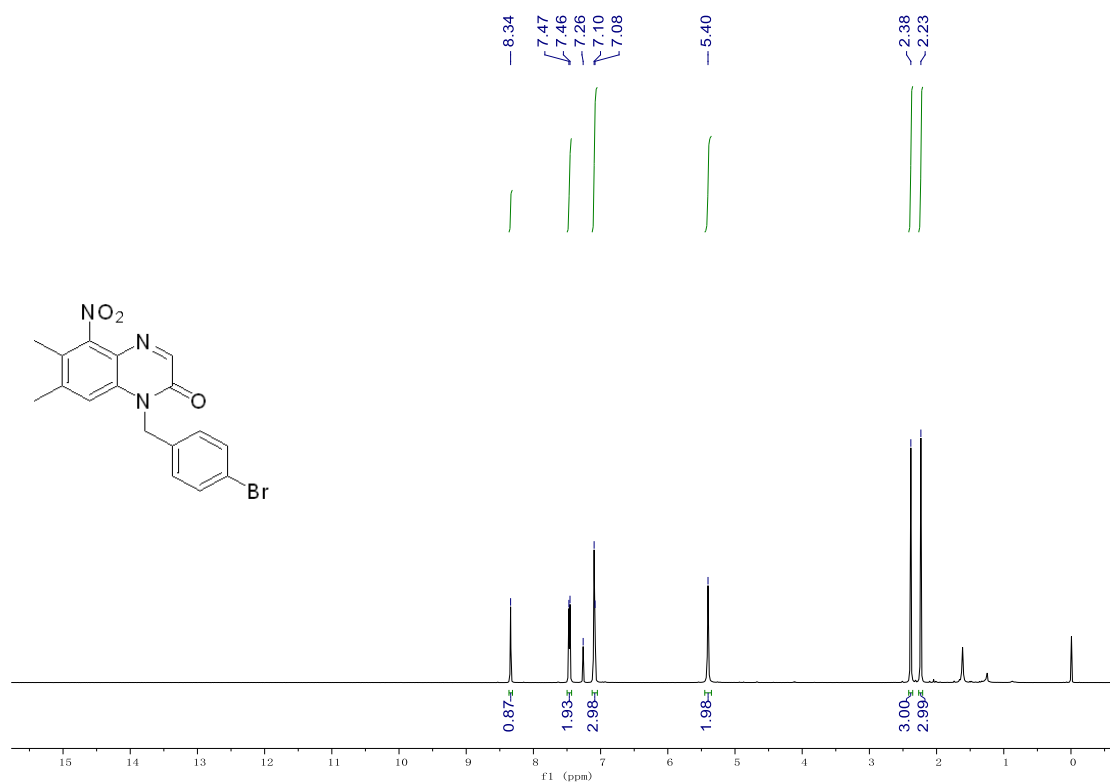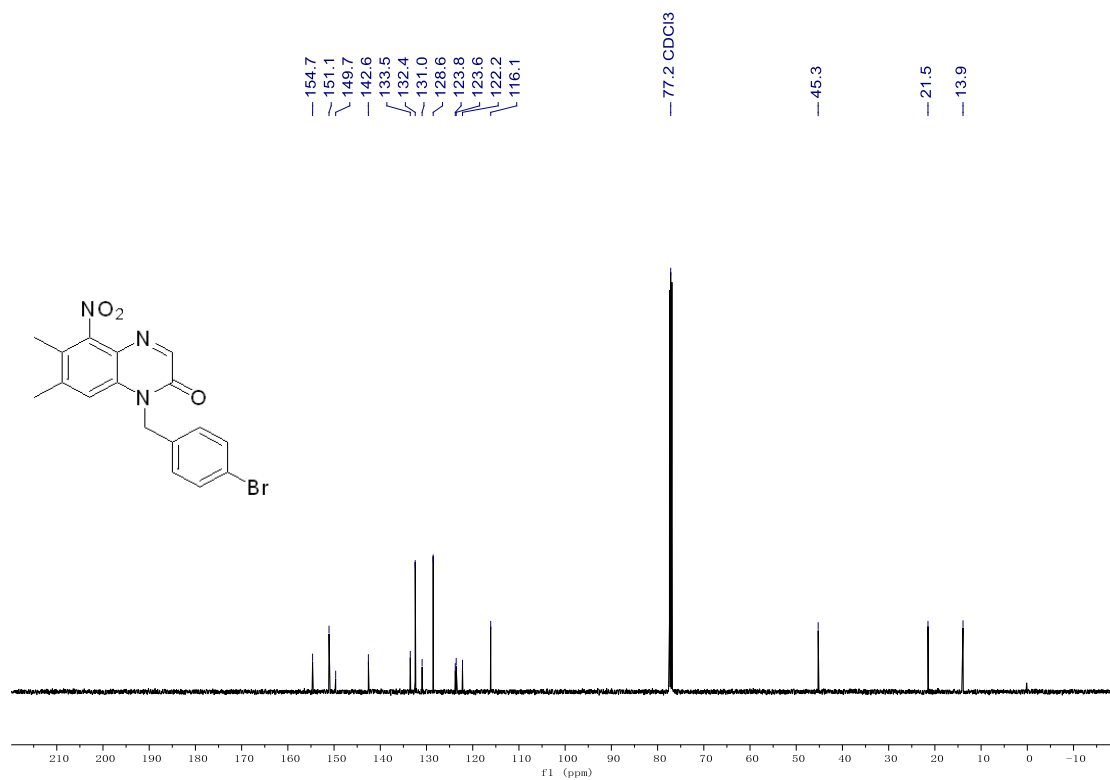



6,7-dichloro-1-methyl-5-nitroquinoxalin-2(1H)-one (2ab)

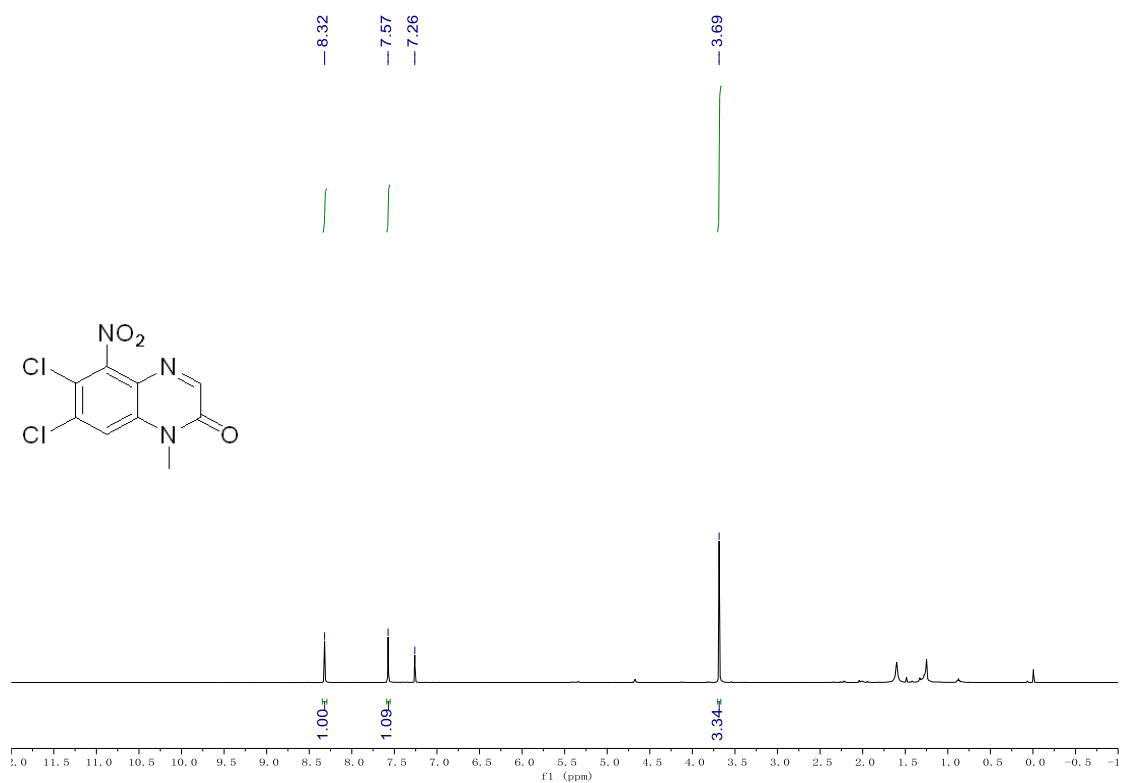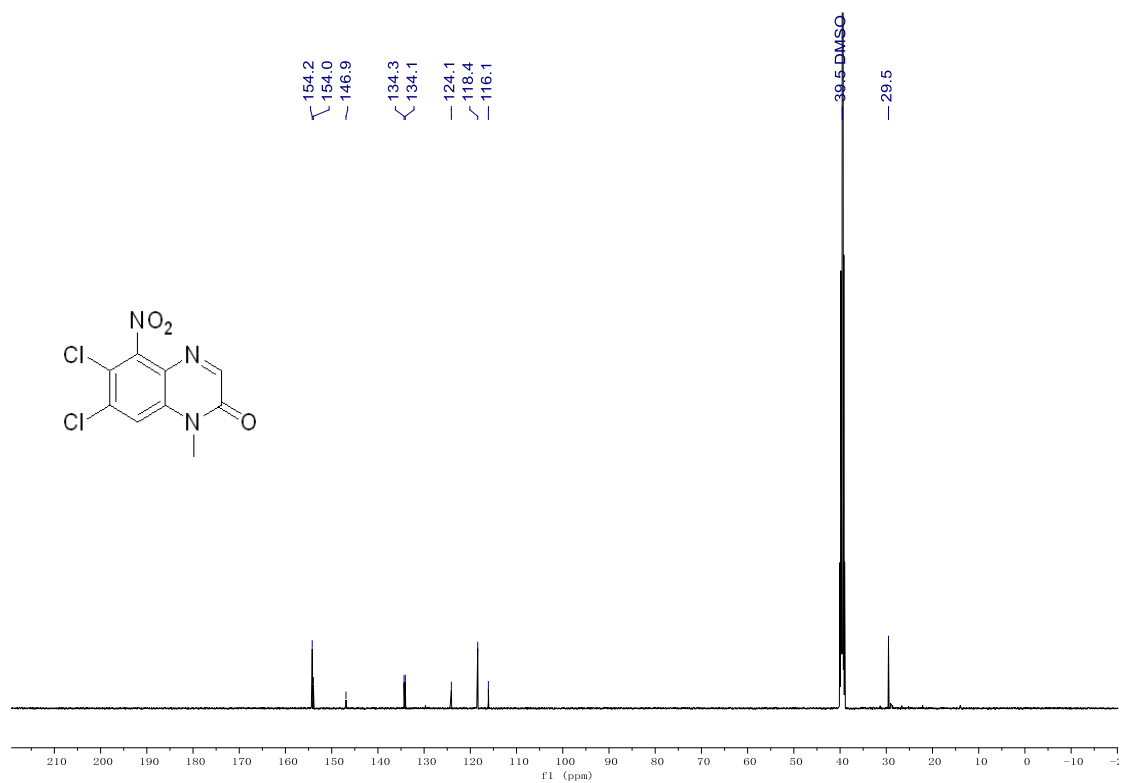

# 6-nitroquinoxaline (2ac)

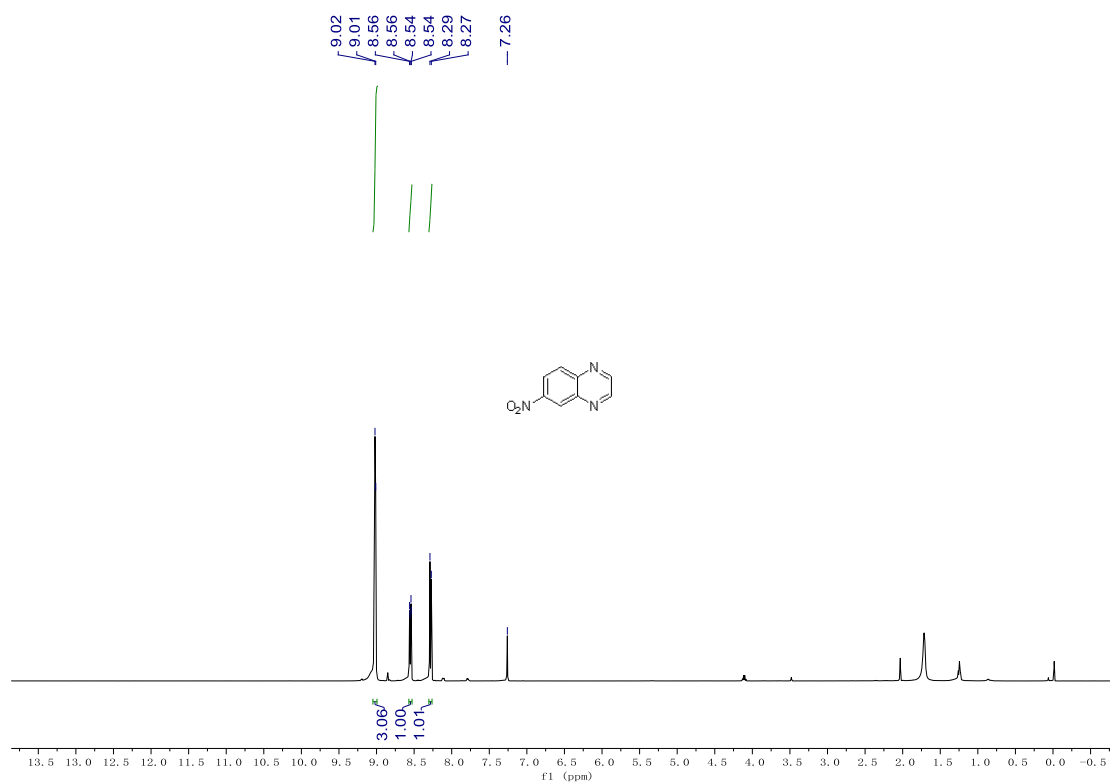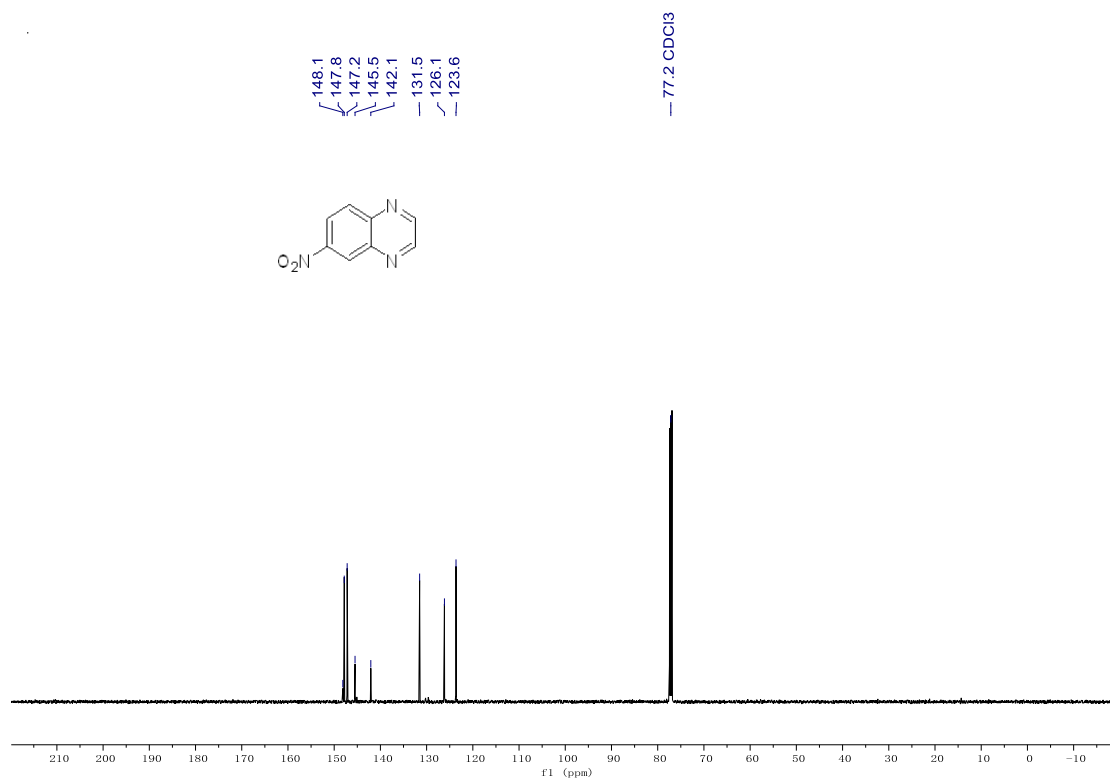

7-amino-1-methylquinoxalin-2(1H)-one (3b)

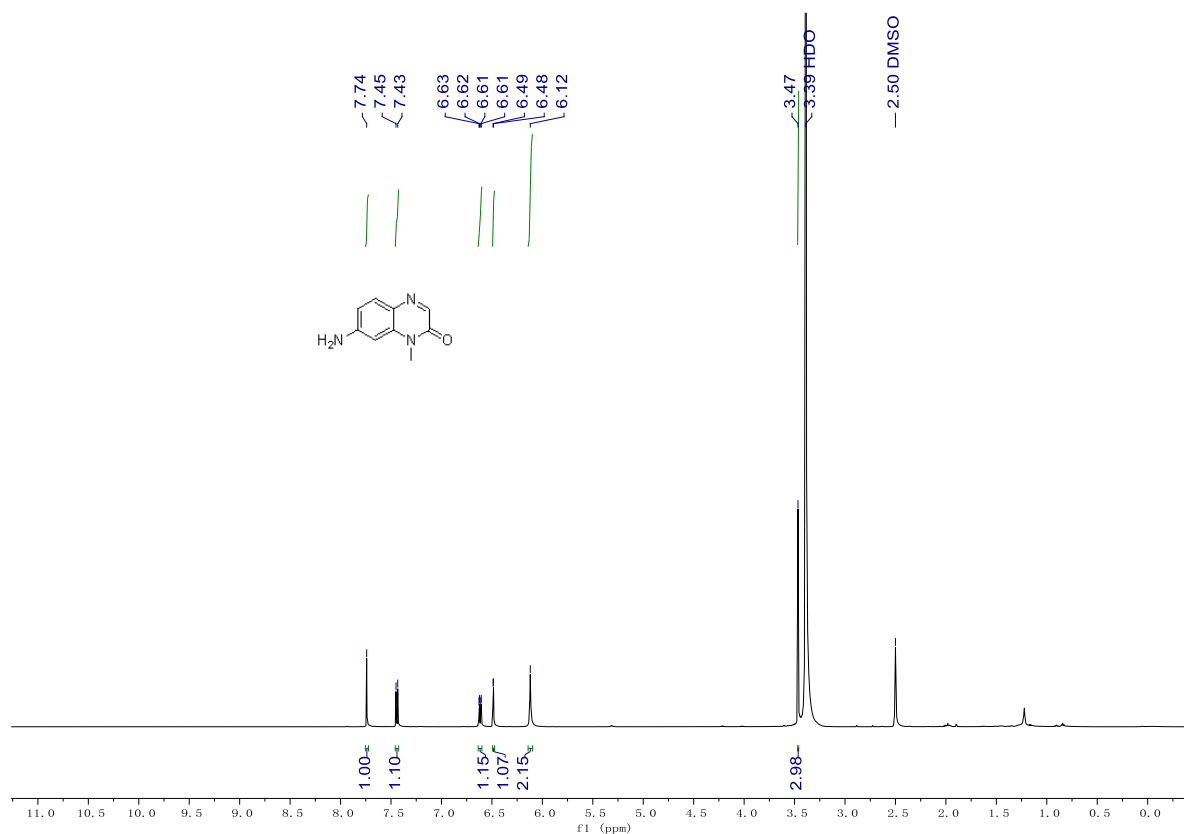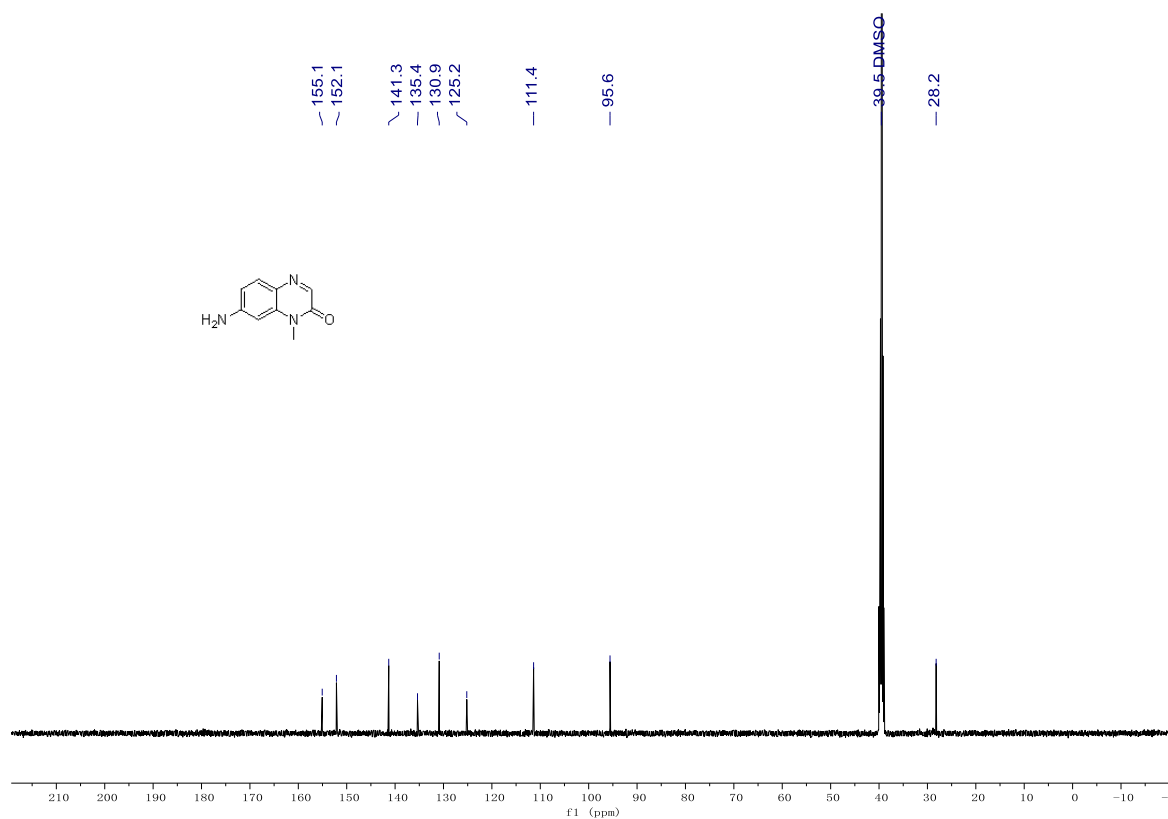

(2-nitroethene-1,1-diyl)dibenzene (4)

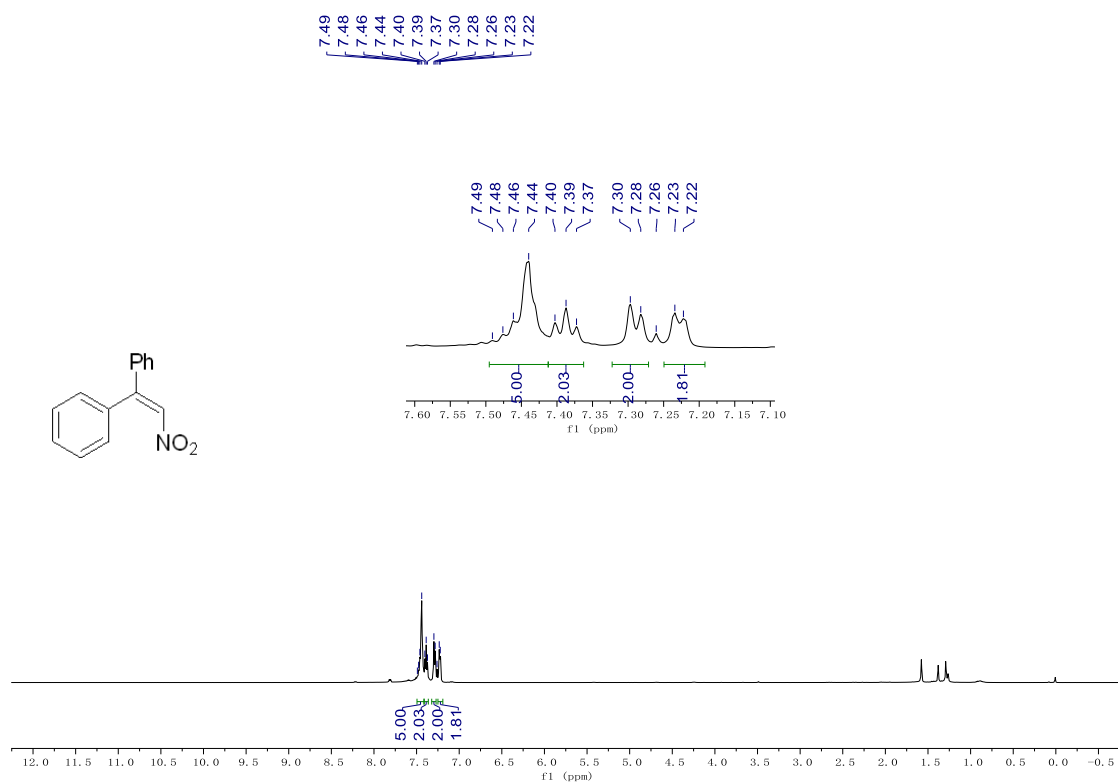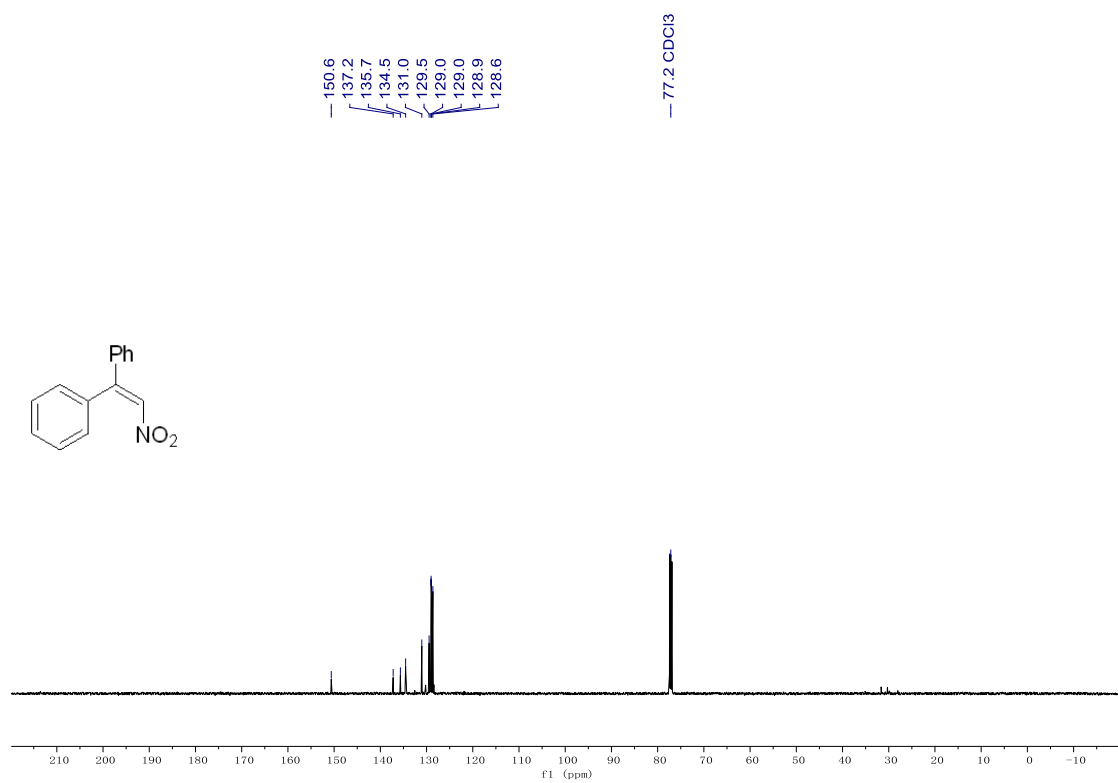

Supplement: d1ob02015c1.pdf [file d1ob02015c1.pdf]
